# Supplementary material for: Mechanistic insights into an NH4OAc-promoted imine dance in Rh-catalysed multicomponent double C–H annulations through an N-retention/exchange dual channel
Source: Royal Society of Chemistry journal article supplement (doi:10.1039/d3sc03861k), 2023-01-01
Supplement: d3sc03861k1.pdf [file d3sc03861k1.pdf]

## Supporting Information for

### **Mechanistic insights into NH<sub>4</sub>OAc-promoted imine dance in Rh-catalysed multicomponent double C–H annulations through N-retention/-exchange dual channel**

Shiqing Li,<sup>\*,a,b,+</sup> Shihai Lv,<sup>a,+</sup> Yanyan Yang,<sup>a,+</sup> Peiyan Zhu,<sup>a</sup> Dongbing Zhao,<sup>b,\*</sup> and Ming-Hua Zeng<sup>\*,a,c</sup>

<sup>a</sup>Guangxi Key Laboratory of Electrochemical and Magneto-Chemical Functional Materials, College of Chemistry and Bioengineering, Guilin University of Technology, Guilin 541004, China; orcid.org/0000-0001-9883-4553; Email: [lisq@glut.edu.cn](mailto:lisq@glut.edu.cn)

<sup>b</sup>State Key Laboratory and Institute of Elemento-Organic Chemistry, College of Chemistry, Nankai University, Tianjin 300071, China; orcid.org/0000-0003-2583-1575; E-mail: [dongbing.chem@nankai.edu.cn](mailto:dongbing.chem@nankai.edu.cn)

<sup>c</sup>State Key Laboratory for Chemistry and Molecular Engineering of Medicinal Resources, School of Chemistry and Pharmaceutical Sciences, Guangxi Normal University, 15 Yu Cai Road, Guilin, 541004, China; orcid.org/0000-0002-7227-7688; Email: [zmh@mailbox.gxnu.edu.cn](mailto:zmh@mailbox.gxnu.edu.cn)

## Table of Contents

|                                                                                                             |      |
|-------------------------------------------------------------------------------------------------------------|------|
| 1 General remarks .....                                                                                     | S3   |
| 2 General procedure for the syntheses .....                                                                 | S3   |
| 2.1 General procedure A (GP A) for the synthesis of 2 <i>H</i> -imidazoles <b>1</b> .....                   | S3   |
| 2.2 General procedure B (GP B) for the four-component reaction to synthesize 1,1'-BIQs .....                | S6   |
| 2.3 General procedure C (GP C) for the six-component reaction to synthesize 1,1'-BIQs .....                 | S7   |
| 2.4 General procedure D (GP D) for the synthesis of non-symmetric 1,1'-BIQs .....                           | S8   |
| 2.5 General procedure E (GP E) for one-pot, two-step synthesis of non-symmetric 1,1'-BIQs ...               | S8   |
| 2.6 General procedure F (GP F) for the synthesis of C-bridged 1,1'-bisisoquinolines .....                   | S8   |
| 3 Control experiments for mechanistic studies .....                                                         | S9   |
| 3.1 Synthesis of compound <b>Int-C</b> .....                                                                | S9   |
| 3.2 Hofmann elimination proof (converting <b>Int-C</b> to <b>3a'</b> ) .....                                | S10  |
| 3.3 Synthesis of <b>3a</b> from <b>Int-C</b> .....                                                          | S11  |
| 3.4 Synthesis of <b>3a</b> from <b>3a'</b> .....                                                            | S11  |
| 4 Isotope labeling experiments .....                                                                        | S11  |
| 4.1 H/D exchange experiments .....                                                                          | S11  |
| 4.2 Kinetic isotope effect (KIE) studies .....                                                              | S14  |
| 4.3 <sup>18</sup> O labeling experiment .....                                                               | S17  |
| 4.4 <sup>15</sup> N labeling experiments .....                                                              | S18  |
| 5 ESI-MS studies .....                                                                                      | S25  |
| 5.1 Detecting the four-component reaction mixture at 30 min .....                                           | S25  |
| 5.2 Detecting the six-component reaction mixture in the presence of <sup>15</sup> NH <sub>4</sub> OAc ..... | S31  |
| 5.3 Time-dependent ESI-MS to monitor the reaction process .....                                             | S36  |
| 5.4 Time-dependent ESI-MS in the synthesis of <b>mix-<sup>15</sup>N-3a</b> .....                            | S37  |
| 6 Synthetic applications .....                                                                              | S39  |
| 6.1 Scale-up reactions (1 mmol) .....                                                                       | S39  |
| 6.2 General procedure for the synthesis of 1,1'-bisisoquinolinium salts <b>7</b> .....                      | S40  |
| 6.3 Synthesis of trisubstituted 1,1'-bisisoquinoline <b>8</b> .....                                         | S40  |
| 6.4 Synthesis of <b>3a</b> from furoxan <b>9</b> .....                                                      | S41  |
| 6.5 Synthesis of <b>3a</b> from diimine <b>10</b> .....                                                     | S41  |
| 6.5 Synthesis of <b>di-<sup>15</sup>N-3a</b> with full <sup>15</sup> N-labeling .....                       | S42  |
| 6.6 Synthesis of <b>mono-<sup>15</sup>N-3a</b> with full <sup>15</sup> N-labeling .....                     | S43  |
| 6.7 Adjusting the <sup>15</sup> N incorporation of <b>mix-<sup>15</sup>N-3a</b> by reaction acidity .....   | S44  |
| 7 Using 1,1'-BIQ as ligand in double <i>N</i> -arylation to synthesize benzo[ <i>c</i> ]cinnolines .....    | S46  |
| 8 Experimental data for the described substances .....                                                      | S47  |
| 9 References .....                                                                                          | S62  |
| 10 Copies of <sup>1</sup> H and <sup>13</sup> C and <sup>19</sup> F spectra .....                           | S64  |
| 11 X-ray crystallographic data .....                                                                        | S101 |

## 1 General remarks

NMR spectra were recorded on a BRUKER Ascend 500. The  $^1\text{H}$  NMR (500 MHz) chemical shifts were measured relative to  $\text{CDCl}_3$  or  $\text{DMSO-}d_6$  as the internal reference ( $\text{CDCl}_3$ :  $\delta = 7.26$  ppm;  $\text{DMSO-}d_6$ :  $\delta = 2.50$  ppm). The  $^{13}\text{C}$  NMR (125 MHz) chemical shifts were given using  $\text{CDCl}_3$  or  $\text{DMSO-}d_6$  the internal standard ( $\text{CDCl}_3$ :  $\delta = 77.16$  ppm;  $\text{DMSO-}d_6$ :  $\delta = 39.52$  ppm). High-resolution mass spectra (HRMS) were obtained with a BRUKER solanX 70 FT-MS (ESI<sup>+</sup>). Melting points were determined with SGW<sup>®</sup> X-4 and are uncorrected. The diffraction data of crystals were collected on a Bruker APEX-II CCD with Ga- K $\alpha$  radiation,  $\lambda = 1.34139$  Å) at 260 K. at Shiyanjia lab (www.Shiyanjia.com).

All reagents were obtained from commercial suppliers and used without further purification. All reaction mixtures were heated with aluminum heating blocks and detected by TLC (thin layer chromatography) with silica gel-coated plates.  $[(\text{Cp}^*\text{RhCl}_2)_2]^1$ , alkynes **2**<sup>2</sup>, furoxan **9**,<sup>3</sup> hexahydroquinoxaline **10**,<sup>4</sup> and cyclic iodoniums **12**<sup>5</sup> were prepared according to the literature procedures.

## 2 General procedure for the syntheses

### 2.1 General procedure A (GP A) for the synthesis of 2H-imidazoles 1

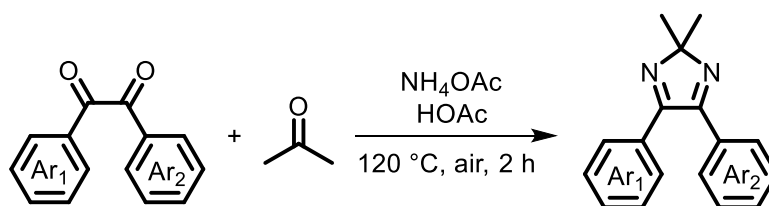

A solution of benzil (1 mmol), acetone (1.03 mmol, 1.03 equiv),  $\text{NH}_4\text{OAc}$  (504 mg, 7 mmol, 7 equiv) in glacial acetic acid (2 mL) was reacted at 120 °C for 2 h under air. After reaction completed, the reaction mixture was cooled to room temperature, then extracted with ethyl acetate. The combine organic phase was washed with saturated aq.  $\text{NaHCO}_3$ , dried with  $\text{MgSO}_4$  and concentrated under vacuum to obtain crude products. The crude products were eluted by flash chromatography with petroleum ether/ethyl acetate (10/1) to afford the 2H-imidazole products **1**.

### 2,2-dimethyl-4,5-diphenyl-2H-imidazole (1a)

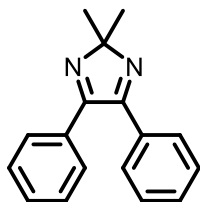

Brown solid (208.2 mg, 84% yield), purification via a silica (100-200 mesh) gel column (petroleum ether/EtOAc = 10/1, v/v). M.p.: 65.0–67.0 °C. **<sup>1</sup>H NMR (500MHz, CDCl<sub>3</sub>):**  $\delta$  = 7.51 (d,  $J$  = 7.0 Hz, 4H), 7.45 (t,  $J$  = 7.3 Hz, 2H), 7.36 (t,  $J$  = 7.5 Hz, 4H), 1.67 (s, 6H) ppm. **<sup>13</sup>C NMR (125 MHz, CDCl<sub>3</sub>):**  $\delta$  = 164.3, 132.8, 130.3, 129.0, 128.4, 101.7, 24.3 ppm. Data in accordance with the literature.<sup>6</sup>

### 2,2-dimethyl-4,5-di-*p*-tolyl-2H-imidazole (1b)

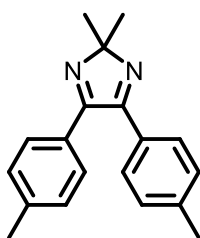

Brown solid (173.5 mg, 81% yield), purification via a silica (100-200 mesh) gel column (petroleum ether/EtOAc = 10/1, v/v). M.p.: 131.0–133.0 °C. **<sup>1</sup>H NMR (500MHz, CDCl<sub>3</sub>):**  $\delta$  = 7.41 (d,  $J$  = 8.0 Hz, 4H), 7.16 (d,  $J$  = 7.5 Hz, 4H), 2.38 (s, 6H), 1.64 (s, 6H) ppm. **<sup>13</sup>C NMR (125 MHz, CDCl<sub>3</sub>):**  $\delta$  = 164.3, 140.4, 130.1, 129.1, 129.0, 101.3, 24.4, 21.6 ppm. **HRMS (ESI)  $m/z$ :** calcd for C<sub>19</sub>H<sub>21</sub>N<sub>2</sub> ([M+H]<sup>+</sup>) 277.1699, found 277.1694.

### 4,5-bis(4-chlorophenyl)-2,2-dimethyl-2H-imidazole (1c)

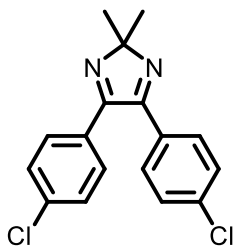

Brown solid (175 mg, 55% yield), purification via a silica (100-200 mesh) gel column (petroleum ether/EtOAc = 20/1→10/1, v/v). M.p.: 157–159 °C. **<sup>1</sup>H NMR (500MHz, CDCl<sub>3</sub>):**  $\delta$  = 7.44 (d,  $J$  = 8.5 Hz, 4H), 7.36 (d,  $J$  = 8.0 Hz, 4H), 1.64 (s, 6H) ppm. **<sup>13</sup>C NMR (125 MHz, CDCl<sub>3</sub>):**  $\delta$  = 163.0, 136.8, 131.0, 130.3, 128.9, 102.2, 24.2 ppm. **HRMS (ESI)  $m/z$ :** calcd for C<sub>17</sub>H<sub>15</sub>Cl<sub>2</sub>N<sub>2</sub> ([M+H]<sup>+</sup>) 317.0607, found 317.0608.

### 4,5-bis(4-fluorophenyl)-2,2-dimethyl-2H-imidazole (1d)

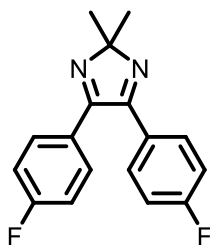

Brown solid (137 mg, 48% yield), purification via a silica (100-200 mesh) gel column (petroleum ether/EtOAc = 10/1, v/v). M.p.: 108–110 °C. **<sup>1</sup>H NMR (500MHz, CDCl<sub>3</sub>):**  $\delta$  = 7.51–7.49 (m, 4H), 7.07 (t,  $J$  = 8.5 Hz, 4H), 1.64 (s, 6H) ppm. **<sup>13</sup>C NMR (125 MHz, CDCl<sub>3</sub>):**  $\delta$  = 164.1 (d,  $J_{C-F}$  = 249.5 Hz), 163.1,

131.1 (d,  $J_{C-F}$  = 8.6 Hz), 128.8 (d,  $J_{C-F}$  = 3.1 Hz), 115.7 (d,  $J_{C-F}$  = 21.8 Hz), 101.8, 24.2 ppm. **HRMS (ESI)  $m/z$** : calcd for  $C_{17}H_{15}N_2F_2$  ( $[M+H]^+$ ) 285.1198, found 285.1195.

#### 2,2-dimethyl-4,5-di-*m*-tolyl-2*H*-imidazole (1e)

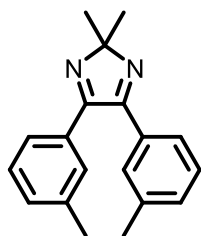

Brown oil (181.1 mg, 65% yield), purification via a silica (100-200 mesh) gel column (petroleum ether/EtOAc = 20/1→10/1, v/v).  **$^1H$  NMR (500MHz,  $CDCl_3$ )**:  $\delta$  = 7.50 (s, 2H), 7.29 (d,  $J$  = 2.5 Hz, 2H), 7.26–7.25 (m, 4H, cover the solvent), 2.39 (s, 6H), 1.71 (s, 6H) ppm.  **$^{13}C$  NMR (125 MHz,  $CDCl_3$ )**:  $\delta$  = 164.5, 138.3, 132.8, 131.1, 129.6, 128.1, 126.2, 101.5, 24.4, 21.5 ppm. **HRMS (ESI)  $m/z$** : calcd for  $C_{19}H_{21}N_2$  ( $[M+H]^+$ ) 277.1699, found 277.1697.

#### 2,2-dimethyl-4,5-di(thiophen-2-yl)-2*H*-imidazole (1f)

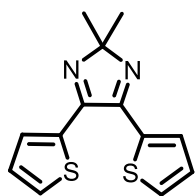

Brown solid (131.4 mg, 50% yield), purification via a silica (100-200 mesh) gel column (petroleum ether/EtOAc = 20/1→10/1, v/v). M.p.: 120–122 °C.  **$^1H$  NMR (500MHz,  $CDCl_3$ )**:  $\delta$  = 7.50 (d,  $J$  = 4.5 Hz, 2H), 7.41 (d,  $J$  = 3.0 Hz, 2H), 7.08 (t,  $J$  = 4.3 Hz, 2H), 1.63 (s, 6H) ppm.  **$^{13}C$  NMR (125 MHz,  $CDCl_3$ )**:  $\delta$  = 157.4, 134.9, 130.4, 129.6, 127.6, 101.7, 24.5 ppm. **HRMS (ESI)  $m/z$** : calcd for  $C_{13}H_{13}N_2S_2$  ( $[M+H]^+$ ) 261.0515, found 261.0514.

#### 4-(4-ethoxyphenyl)-2,2-dimethyl-5-(*p*-tolyl)-2*H*-imidazole (1g)

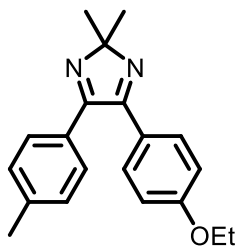

Brown oil (236.5 mg, 77% yield), purification via a silica (100-200 mesh) gel column (petroleum ether/EtOAc = 10/1→2/1, v/v).  **$^1H$  NMR (500MHz,  $CDCl_3$ )**:  $\delta$  = 7.46 (d,  $J$  = 8.5 Hz, 2H), 7.41 (d,  $J$  = 7.5 Hz, 2H), 7.16 (d,  $J$  = 7.5 Hz, 2H), 6.85 (d,  $J$  = 8.5 Hz, 2H), 4.04 (q,  $J$  = 7.0 Hz, 2H), 2.38 (s, 3H), 1.63 (s, 6H), 1.41 (t,  $J$  = 7.0 Hz, 3H) ppm.  **$^{13}C$  NMR (125 MHz,  $CDCl_3$ )**:  $\delta$  = 164.4, 163.8, 160.6, 140.3, 130.7, 130.2, 129.1, 128.9, 125.0, 114.2, 101.1, 63.6, 24.4, 21.6, 14.8 ppm. **HRMS (ESI)  $m/z$** : calcd for  $C_{20}H_{23}N_2O$  ( $[M+H]^+$ ) 307.1805, found 307.1805.

## 2.2 General procedure B (GP B) for the four-component reaction to synthesize 1,1'-BIQs

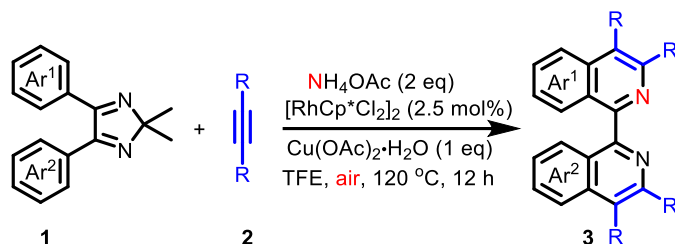

The mixture of 2H-imidazole **1** (0.1 mmol), alkyne **2** (0.2 mmol, 2 equiv),  $[(\text{Cp}^*\text{RhCl}_2)_2]$  (1.6 mg, 2.5 mol%),  $\text{Cu}(\text{OAc})_2 \cdot \text{H}_2\text{O}$  (20 mg, 0.1 mmol, 1 equiv),  $\text{NH}_4\text{OAc}$  (15.4 mg, 0.2 mmol, 2 equiv) and TFE (2 mL) was stirred at 120 °C for 12 h under air. The reaction mixture was concentrated under vacuum and the residue was purified by a neutral aluminum oxide (200–300 mesh) column, eluting with petroleum ether/EtOAc (80/1  $\rightarrow$  8/1, v/v) to afford products **3**.

**Table S1.** Optimization of the four-component reaction conditions<sup>a</sup>

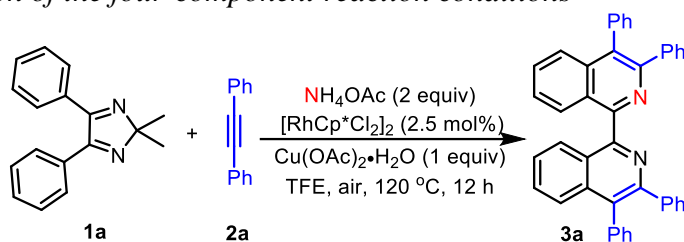

| entry | variation from the standard conditions                                                    | yield (%) <sup>b</sup> |
|-------|-------------------------------------------------------------------------------------------|------------------------|
| 1     | <b>none</b>                                                                               | <b>93</b>              |
| 2     | without $\text{NH}_4\text{OAc}$                                                           | 26                     |
| 3     | $\text{NH}_4\text{OAc}$ (1 equiv)                                                         | 74                     |
| 4     | $\text{NH}_4\text{Cl}$ or $(\text{NH}_4)_2\text{CO}_3$ instead of $\text{NH}_4\text{OAc}$ | trace                  |
| 5     | $\text{RhCl}_3 \cdot 3\text{H}_2\text{O}$ as catalyst                                     | n.d.                   |
| 6     | $\text{Cp}^*\text{Co}(\text{CO})\text{I}_2$ as catalyst                                   | n.d.                   |
| 7     | $[\text{Ru}(p\text{-cymene})\text{Cl}_2]_2$ as catalyst                                   | trace                  |
| 8     | without $\text{Cu}(\text{OAc})_2 \cdot \text{H}_2\text{O}$                                | 35                     |
| 9     | under $\text{N}_2$                                                                        | 42                     |
| 10    | without $\text{Cu}(\text{OAc})_2 \cdot \text{H}_2\text{O}$ under $\text{N}_2$             | 18                     |
| 11    | $\text{Cu}(\text{OAc})_2 \cdot \text{H}_2\text{O}$ (0.5 equiv)                            | 67                     |
| 12    | $\text{Cu}(\text{OAc})_2 \cdot \text{H}_2\text{O}$ (2 equiv)                              | 89                     |
| 13    | $\text{Cu}(\text{OAc})_2 \cdot \text{H}_2\text{O}$ (2 equiv) under $\text{N}_2$           | 85                     |
| 14    | $\text{Ag}_2\text{CO}_3$ or $\text{AgOTf}$ as oxidant                                     | 72, 54                 |
| 15    | HFIP as solvent                                                                           | 82                     |
| 16    | MeOH as solvent                                                                           | 12                     |
| 17    | DCE as solvent                                                                            | trace                  |
| 18    | 1,4-dioxane as solvent                                                                    | n.d.                   |

<sup>a</sup>Reaction conditions: **1a** (0.1 mmol), **2a** (0.2 mmol), NH<sub>4</sub>OAc (2 equiv), [Cp\*RhCl<sub>2</sub>]<sub>2</sub> (2.5 mol%) and Cu(OAc)<sub>2</sub>·H<sub>2</sub>O (1 equiv) in TFE (2 mL) at 120 °C for 12 h under air. <sup>b</sup>Isolated yield. TFE = trifluoroethanol, HFIP = hexafluoroisopropanol, DCE = 1,2-dichloroethane. n.d. = not detected.

### 2.3 General procedure C (GP C) for the six-component reaction to synthesize 1,1'-BIQs

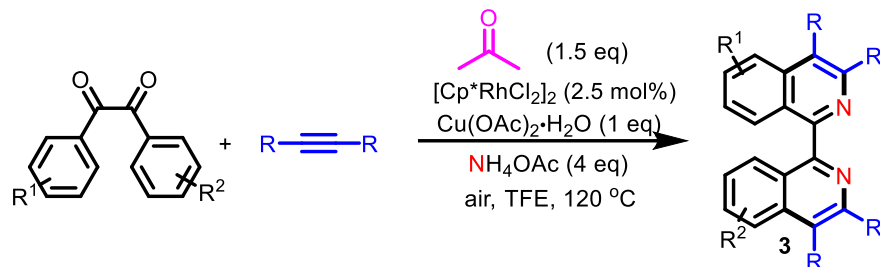

The mixture of benzil (0.1 mmol), alkyne (0.2 mmol, 2 equiv), acetone (8.7 mg, 0.15 mmol, 1.5 equiv), [(Cp\*RhCl<sub>2</sub>)<sub>2</sub>] (1.6 mg, 2.5 mol%), Cu(OAc)<sub>2</sub>·H<sub>2</sub>O (20 mg, 0.1 mmol, 1 equiv), NH<sub>4</sub>OAc (30.8mg, 0.4 mmol, 4 equiv) and TFE (2 mL) was stirred at 120 °C for 12 h under air. The reaction mixture was concentrated under vacuum and the residue was purified by a neutral aluminum oxide (200–300 mesh) column, eluting with petroleum ether/EtOAc (80/1 → 8/1, v/v) to afford compounds **3**.

**Table S2.** Optimization of the six-component reaction conditions

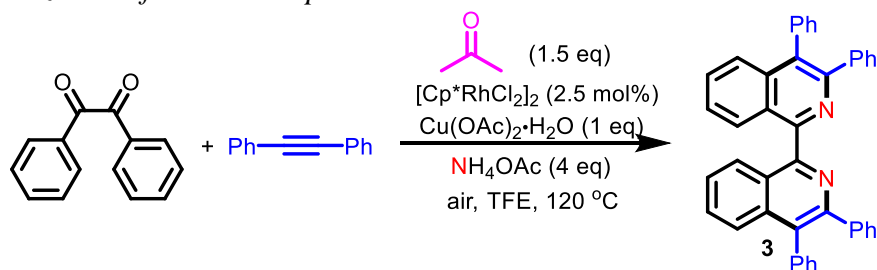

| entry | acetone   | NH <sub>4</sub> OAc | yield (%) <sup>b</sup> |
|-------|-----------|---------------------|------------------------|
| 1     | none      | 2 equiv             | n.d.                   |
| 2     | 1.5 equiv | 2 equiv             | 25%                    |
| 3     | 1.5 equiv | 4 equiv             | 52%                    |

<sup>a</sup>Reaction conditions: benzil (0.1 mmol), alkyne **2a** (0.2 mmol), acetone (x equiv), NH<sub>4</sub>OAc (y equiv), [Cp\*RhCl<sub>2</sub>]<sub>2</sub> (2.5 mol%) and Cu(OAc)<sub>2</sub>·H<sub>2</sub>O (1 equiv) in TFE (2 mL) at 120 °C for 12 h under air. <sup>b</sup>Isolated yield. TFE = trifluoroethanol, n.d. = not detected.

## 2.4 General procedure D (GP D) for the synthesis of non-symmetric 1,1'-BIQs

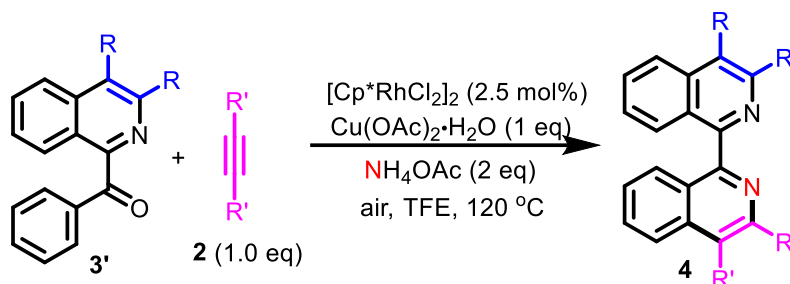

The mixture of **3'** (0.1 mmol), alkyne **2** (0.1 mmol, 1 equiv),  $[\text{Cp}^*\text{RhCl}_2]_2$  (1.6 mg, 2.5 mol%),  $\text{Cu}(\text{OAc})_2 \cdot \text{H}_2\text{O}$  (20 mg, 0.1 mmol, 1 equiv),  $\text{NH}_4\text{OAc}$  (15.4 mg, 0.2 mmol, 2 equiv) and TFE (2 mL) was stirred at 120 °C for 12 h under air. The reaction mixture was concentrated under vacuum and the residue was purified by a neutral aluminum oxide (200–300 mesh) column, eluting with petroleum ether/EtOAc (80/1 → 8/1, v/v) to afford non-symmetric products **4**.

## 2.5 General procedure E (GP E) for one-pot, two-step synthesis of non-symmetric 1,1'-BIQs

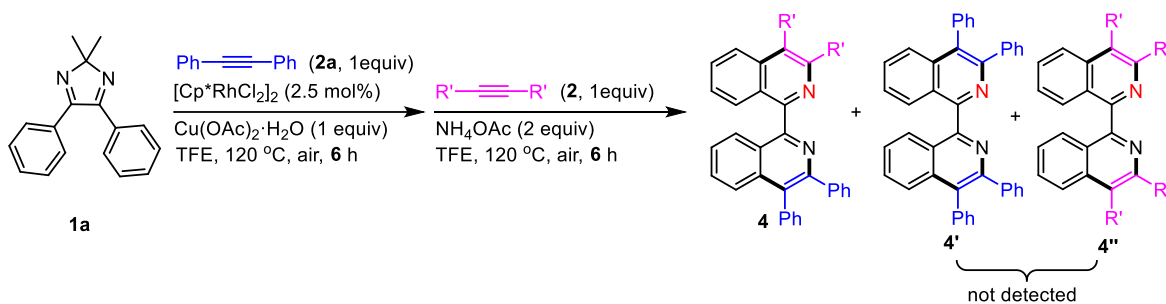

A solution of **1a** (24.8 mg, 0.1 mmol), alkyne **2a** (17.8 mg, 0.1 mmol, 1 equiv),  $[\text{Cp}^*\text{RhCl}_2]_2$  (1.6 mg, 2.5 mol%),  $\text{Cu}(\text{OAc})_2 \cdot \text{H}_2\text{O}$  (20 mg, 0.1 mmol, 1 equiv) and TFE (2 mL) was reacted at 120 °C for 6 h under air, then another molecule of alkyne **2** (0.1 mmol, 1 equiv) and  $\text{NH}_4\text{OAc}$  (15.4 mg, 0.2 mmol, 2 equiv) were added to the reactor. The resulting mixture was stirred at 120 °C for another 6 h under air. After reaction complete, the reaction mixture was concentrated under vacuum and the residue was purified by a neutral aluminum oxide (200–300 mesh) column, eluting with petroleum ether/EtOAc (80/1 → 8/1, v/v) to afford non-symmetric products **4**. (Notably, this reaction shows high chemo-selectivity, giving **4** solely without generation of **4'** and **4''**).

## 2.6 General procedure F (GP F) for the synthesis of C-bridged 1,1'-bisoquinolines



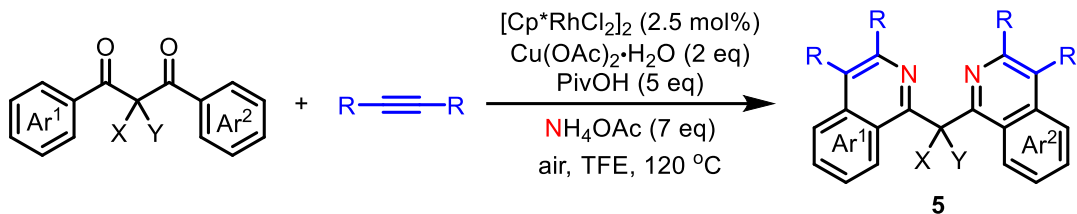

The mixture of 1,3-diketone (0.1 mmol), alkyne (0.2 mmol, 2 equiv),  $\text{NH}_4\text{OAc}$  (54 mg, 0.7 mmol, 7 equiv),  $[(\text{Cp}^*\text{RhCl}_2)_2]$  (1.6 mg, 2.5 mol%),  $\text{Cu}(\text{OAc})_2 \cdot \text{H}_2\text{O}$  (40 mg, 0.2 mmol, 2 equiv),  $\text{PivOH}$  (102 mg, 0.5 mmol, 5 equiv) and TFE (2 mL) was stirred at 120 °C for 12 h under air. The reaction mixture was concentrated under vacuum and the residue was purified by flash chromatography with petroleum ether/ethyl acetate (80/1  $\rightarrow$  40/1, v/v) to afford compounds **5**.

### 3 Control experiments for mechanistic studies

#### 3.1 Synthesis of compound Int-C

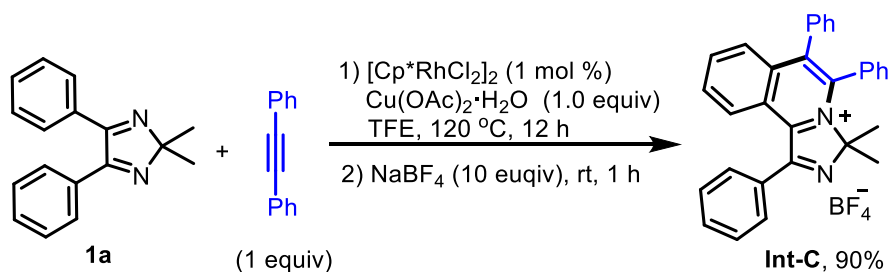

A solution of **1a** (24.8 mg, 0.1 mmol), alkyne **2a** (17.8 mg, 0.1 mmol, 1 equiv),  $[(\text{Cp}^*\text{RhCl}_2)_2]$  (0.6 mg, 1 mol%),  $\text{Cu}(\text{OAc})_2 \cdot \text{H}_2\text{O}$  (20 mg, 0.1 mmol, 1 equiv) and TFE (2 mL) was reacted at 120 °C for 12 h under air. Then  $\text{NaBF}_4$  (110 mg, 1 mmol, 10 equiv) was added to the reaction mixture for reacting at room temperature for another 1 h. The reaction mixture was concentrated under vacuum and the residue was purified by a silica gel (100–200 mesh) column, eluting with  $\text{CH}_2\text{Cl}_2/\text{CH}_3\text{OH}$  (80/1  $\rightarrow$  10/1, v/v) to afford **Int-C** as a yellow solid.

#### 3,3-dimethyl-1,5,6-triphenyl-3H-imidazo[5,1-a]isoquinolin-4-ium tetrafluoroborate (**Int-C**)

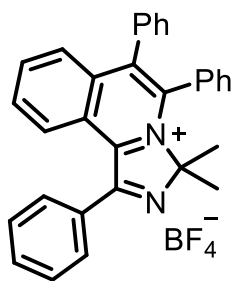

Yellow solid (46.3mg, 90% yield). M.p.: >250 °C.  $^1\text{H NMR}$  (500MHz,  $\text{DMSO}-d_6$ ):  $\delta$  = 8.19 (t,  $J$  = 7.5 Hz, 1H), 8.12 (d,  $J$  = 8.5 Hz, 1H), 7.97 (t,  $J$  = 7.5 Hz, 1H), 7.89–7.87 (m, 2H), 7.81–7.78 (m, 3H), 7.62–7.58 (m, 3H), 7.48–7.36 (m, 6H), 7.24 (d,  $J$  = 6.5 Hz, 2H), 1.77 (s, 6H) ppm.  $^{13}\text{C NMR}$  (125 MHz,  $\text{DMSO}-d_6$ ):  $\delta$  = 162.3, 146.3, 142.8, 139.6, 139.3, 136.8, 133.2, 132.6, 132.6, 131.3, 131.2, 130.5, 130.0, 129.6, 129.3, 128.7, 128.6, 128.3, 127.4, 127.0,

126.3, 122.1, 104.0, 24.5 ppm.  $^{19}\text{F}$  NMR (470 MHz,  $\text{DMSO-}d_6$ ):  $\delta = -148.35, -148.45$  ppm.  
HRMS (ESI)  $m/z$ : calcd for  $\text{C}_{31}\text{H}_{25}\text{N}_2$  ( $[\text{M}-\text{BF}_4^-]^+$ ) 425.2012, found 425.2010.

### 3.2 Hofmann elimination proof (converting Int-C to 3a')

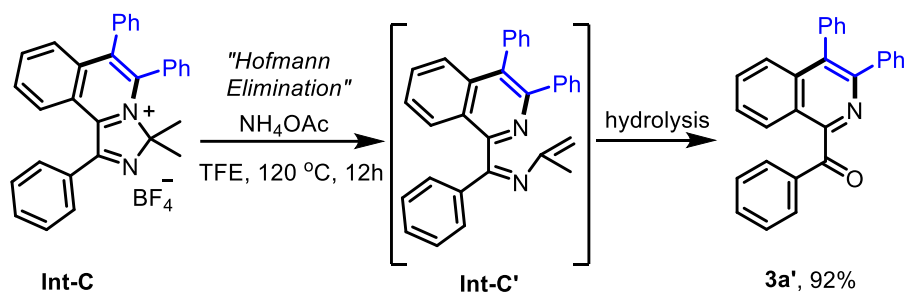

A solution of **In-C** (51.2 mg, 0.1 mmol),  $\text{NH}_4\text{OAc}$  (15.4 mg, 0.2 mmol, 2 equiv) and TFE (2 mL) was reacted at 120 °C for 12 h under air. The reaction mixture was concentrated under vacuum and the residue was purified by a silica gel (100–200 mesh) column, eluting with petroleum ether/EtOAc (100/1  $\rightarrow$  80/1, v/v) to afford **3a'** as a white solid (35.6 mg, 92% yield).

### (3,4-diphenylisoquinolin-1-yl)(phenyl)methanone (3a')

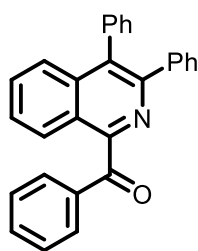

Yellow solid (36.5 mg, 95% yield), purification via a silica (100-200 mesh) gel column (petroleum ether/EtOAc = 100/1 $\rightarrow$ 80/1, v/v).  $^1\text{H}$  NMR (500MHz,  $\text{CDCl}_3$ ):  $\delta = 8.25$  (d,  $J = 8.5$  Hz, 1H), 8.12 (d,  $J = 7.0$  Hz, 2H), 7.76 (d,  $J = 8.5$  Hz, 1H), 7.66–7.58 (m, 3H), 7.52 (t,  $J = 7.8$  Hz, 2H), 7.43–7.37 (m, 5H), 7.32–7.31 (m, 2H), 7.18–7.17 (m, 3H) ppm.  $^{13}\text{C}$  NMR (125 MHz,  $\text{CDCl}_3$ ):  $\delta = 194.9, 155.9, 149.0, 140.2, 137.2, 137.1, 136.8, 133.8, 132.5, 131.3, 131.1, 130.8, 130.5, 128.6, 128.6, 127.8, 127.4, 126.4, 126.1, 125.2$  ppm. The NMR data are consistent with the literature.<sup>7</sup>

### 3.3 Synthesis of **3a** from **Int-C**

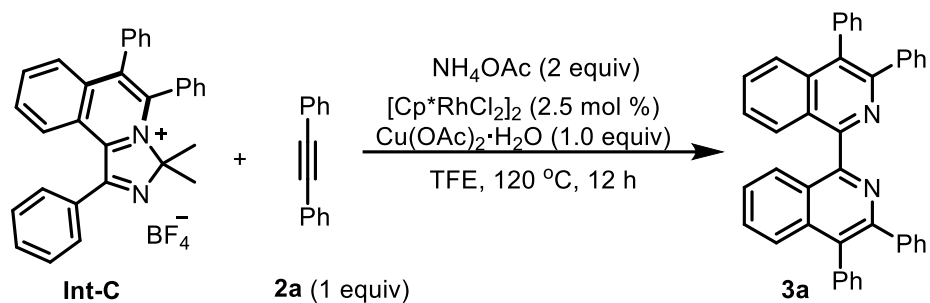

A solution of **Int-C** (51.2 mg, 0.1 mmol), alkyne **2a** (17.8 mg, 0.1 mmol, 1 equiv),  $[(\text{Cp}^*\text{RhCl}_2)_2]$  (1.6 mg, 2.5 mol%),  $\text{Cu}(\text{OAc})_2\cdot\text{H}_2\text{O}$  (20 mg, 0.1 mmol, 1 equiv),  $\text{NH}_4\text{OAc}$  (15.4 mg, 0.2 mmol, 2 equiv) and TFE (2 mL) was stirred at 120 °C for 12 h under air. The reaction gave **3a** as a white solid (39.2 mg, 70% yield) by purifying through a neutral aluminum oxide (200–300 mesh) column, eluting with petroleum ether/EtOAc (100/1  $\rightarrow$  80/1, v/v).

### 3.4 Synthesis of **3a** from **3a'**

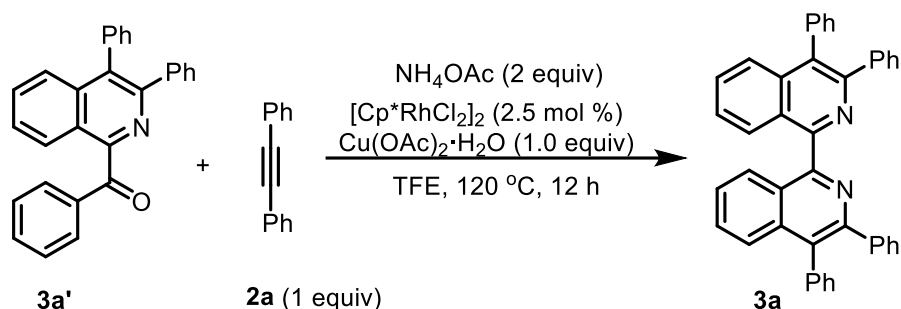

The reaction of **3a'** (38.5 mg, 0.1 mmol), alkyne **2a** (17.8 mg, 0.1 mmol, 1 equiv),  $[(\text{Cp}^*\text{RhCl}_2)_2]$  (1.6 mg, 2.5 mol%),  $\text{Cu}(\text{OAc})_2\cdot\text{H}_2\text{O}$  (20 mg, 0.1 mmol, 1 equiv),  $\text{NH}_4\text{OAc}$  (15.4 mg, 0.2 mmol, 2 equiv) and TFE (2 mL) at 120 °C for 12 h under air afforded **3a** as a white solid (55 mg, 98% yield).

## 4 Isotope labeling experiments

### 4.1 H/D exchange experiments

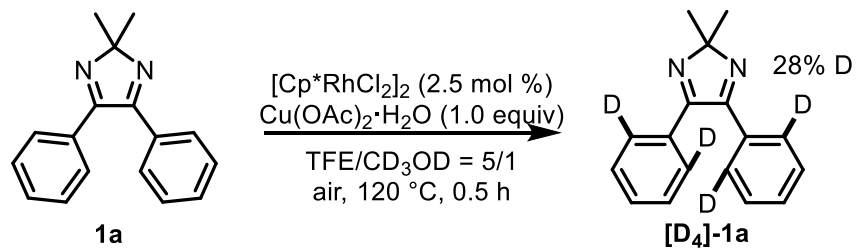

The mixture of **1a** (12.4 mg, 0.05 mmol), [(Cp\**RhCl*<sub>2</sub>)<sub>2</sub>] (0.8 mg, 2.5 mol %), Cu(OAc)<sub>2</sub>·H<sub>2</sub>O (10 mg, 0.05 mmol, 1 equiv) in TFE (1 mL) and CD<sub>3</sub>OD (0.2 mL) was reacted at 120 °C for 0.5 h under air. After the reaction was cooled down, the solvent was evaporated under reduced pressure and the residue was purified by flash column chromatography on silica gel, eluting with petroleum ether/EtOAc (10/1 → 5/1, v/v) to afford **[D<sub>4</sub>]-1a**. <sup>1</sup>H NMR analysis showed that (4-2.88)/4=28% hydrogen at the *ortho* positions of the phenyl ring was deuterated.

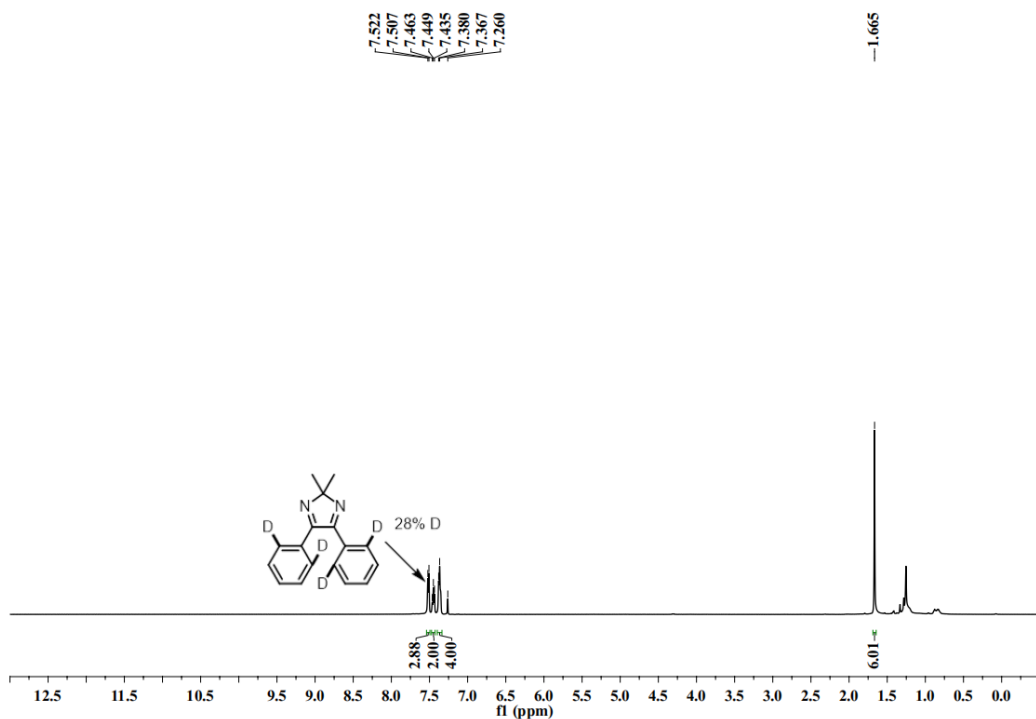

<sup>1</sup>H NMR (500 MHz, CDCl<sub>3</sub>) of **[D<sub>4</sub>]-1a**

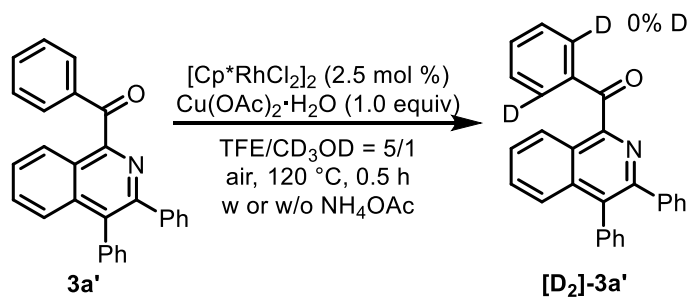

The mixture of **3a'** (19.3 mg, 0.05 mmol), [(Cp\**RhCl*<sub>2</sub>)<sub>2</sub>] (0.8 mg, 2.5 mol %), Cu(OAc)<sub>2</sub>·H<sub>2</sub>O (10 mg, 0.05 mmol, 1 equiv), with or without NH<sub>4</sub>OAc (7.7 mg, 0.1 mmol, 2 equiv) in TFE (1 mL) and CD<sub>3</sub>OD (0.2 mL) was reacted at 120 °C for 0.5 h under air. After the reaction was cooled down, the solvent was evaporated under reduced pressure and the residue was purified by flash

column chromatography on silica gel, eluting with petroleum ether/EtOAc (10/1 → 5/1, v/v) to afford **[D<sub>2</sub>]-3a'**. <sup>1</sup>H NMR analysis showed that 0% hydrogen at the *ortho* positions of the phenyl ring was deuterated.

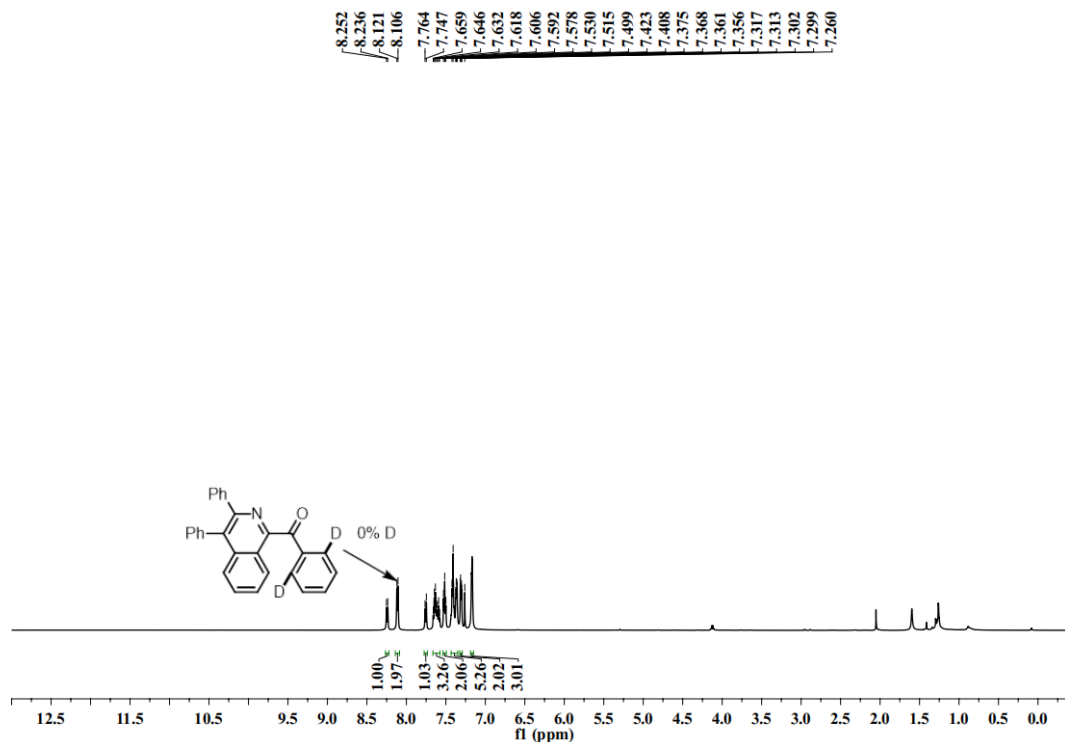

<sup>1</sup>H NMR (500 MHz, CDCl<sub>3</sub>) of **[D<sub>2</sub>]-3a'** (with NH<sub>4</sub>OAc)

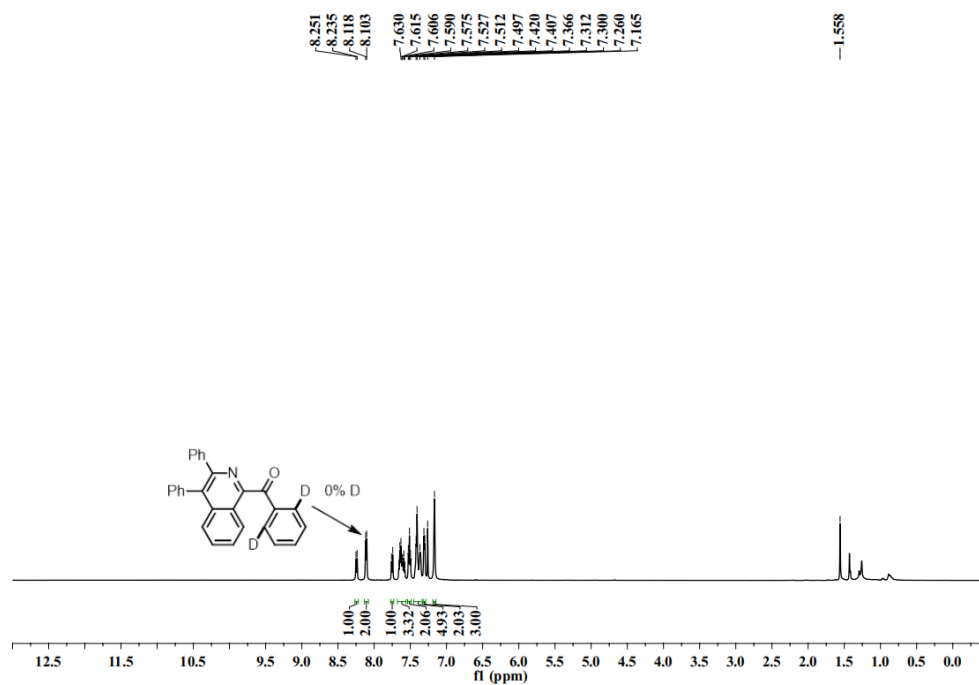

<sup>1</sup>H NMR (500 MHz, CDCl<sub>3</sub>) of **[D<sub>2</sub>]-3a'** (without NH<sub>4</sub>OAc)

## 4.2 Kinetic isotope effect (KIE) studies

### KIE of the first C-H activation

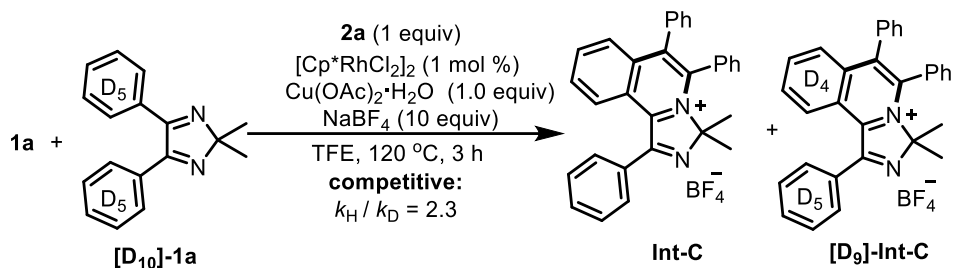

The mixture of **1a** (12.4 mg, 0.05 mmol), **[D<sub>10</sub>]-1a** (12.9 mg, 0.05 mmol), **2a** (0.05 mmol, 8.9 mg, 1 equiv),  $[(\text{Cp}^*\text{RhCl}_2)_2]$  (1.6 mg, 2.5 mol %),  $\text{Cu}(\text{OAc})_2\cdot\text{H}_2\text{O}$  (20 mg, 0.05 mmol, 1 equiv) and TFE (2 mL) was reacted at 120 °C for 3 h under air. After the reaction was cooled down the solvent was evaporated under reduced pressure and the residue was purified by a silica gel (100–200 mesh) column, eluting with  $\text{CH}_2\text{Cl}_2/\text{CH}_3\text{OH}$  (80/1  $\rightarrow$  10/1, v/v) to afford the mixture of **Int-C** and **[D<sub>9</sub>]-Int-C**. The ratio of **Int-C**/([D<sub>9</sub>]-**Int-C**) was determined to be 2.3 ( $k_{\text{H}}/k_{\text{D}} \approx 0.7/[1-0.7] = 2.3$ ) by  $^1\text{H}$  NMR.

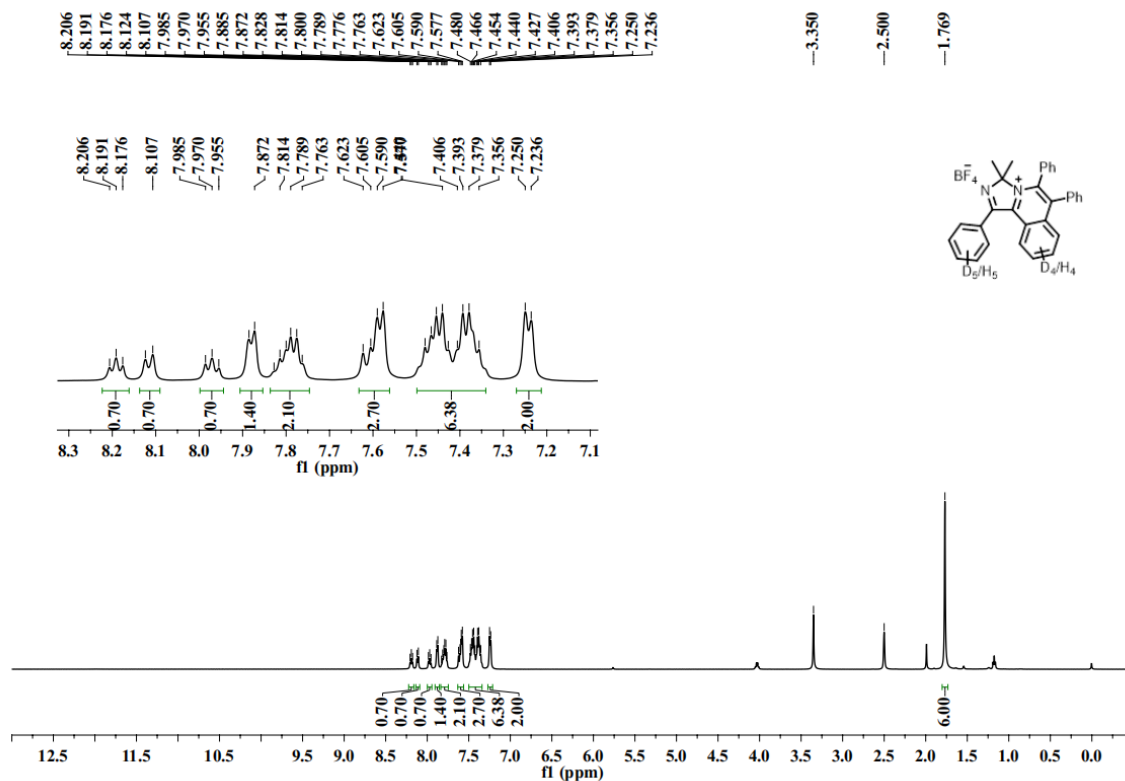

## KIE of the second C-H activation

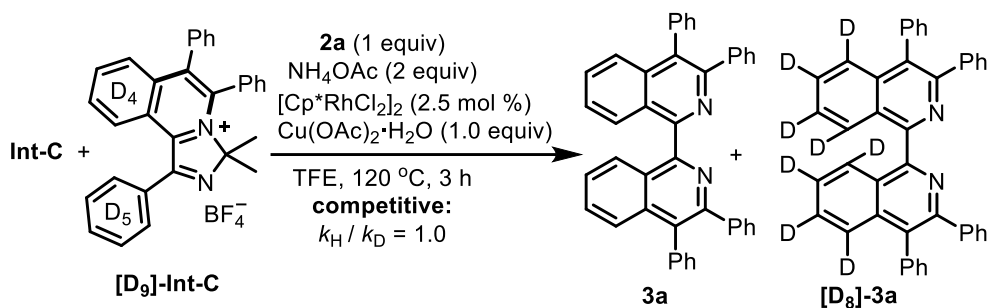

The mixture of **Int-C** (25.6 mg, 0.05 mmol), **[D<sub>9</sub>]-Int-C** (26.1 mg, 0.05 mmol), **2a** (0.05 mmol, 8.9 mg, 1 equiv),  $[\text{Cp}^*\text{RhCl}_2]_2$  (1.6 mg, 2.5 mol %),  $\text{Cu(OAc)}_2 \cdot \text{H}_2\text{O}$  (20 mg, 0.05 mmol, 1 equiv),  $\text{NH}_4\text{OAc}$  (15.4 mg, 0.1 mmol, 2 equiv) and TFE (2 mL) was reacted at 120 °C for 3 h under air. After the reaction was completed, the solvent was evaporated and the residue was purified by a neutral aluminum oxide (200–300 mesh) column, eluting with petroleum ether/EtOAc (100/1 → 60/1, v/v) to afford the mixture of **3a** and **[D<sub>8</sub>]-3a**. The ratio of **3a**/[**[D<sub>8</sub>]-3a**] was determined to be 1.0 ( $k_{\text{H}}/k_{\text{D}} \approx 1/[2-1] = 1.0$ ) by  $^1\text{H}$  NMR.

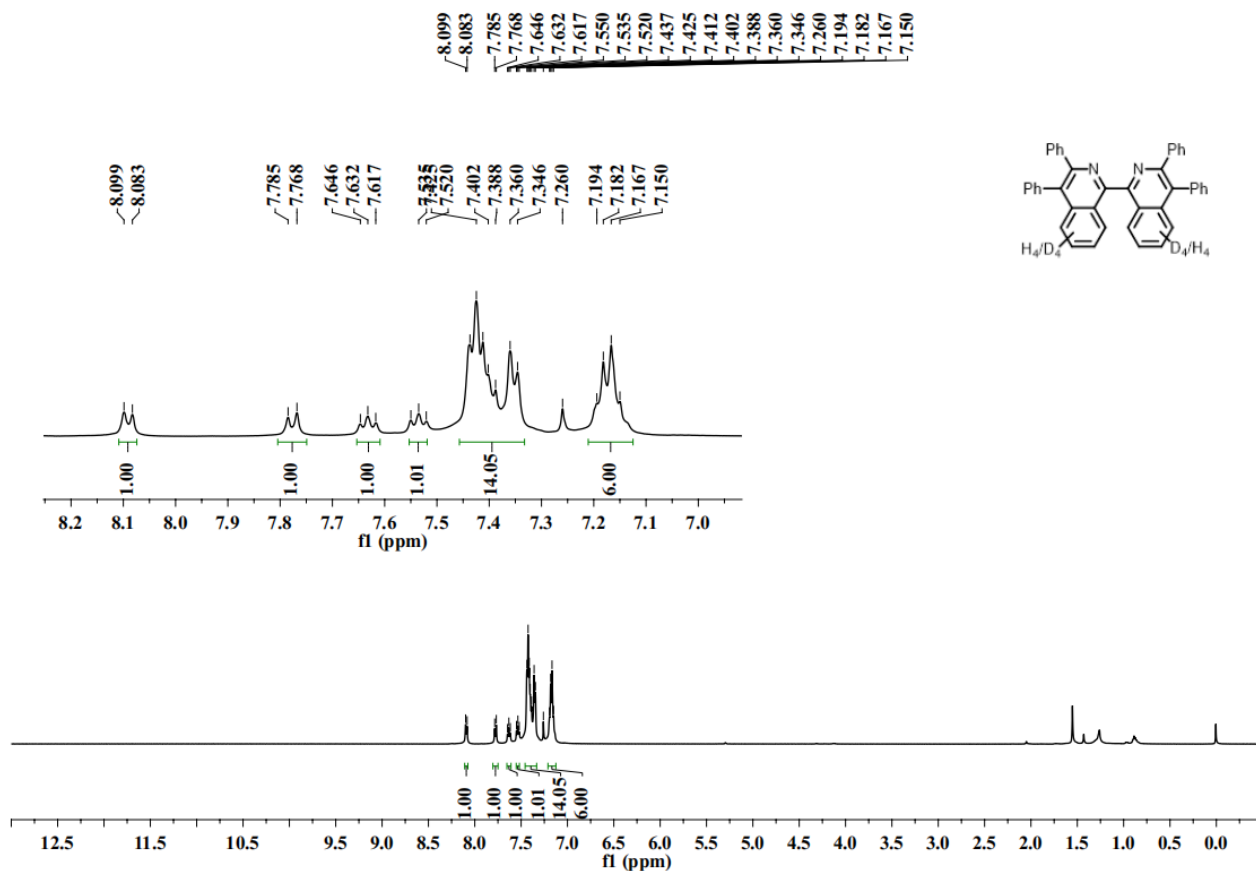

### KIE of the double C-H activation

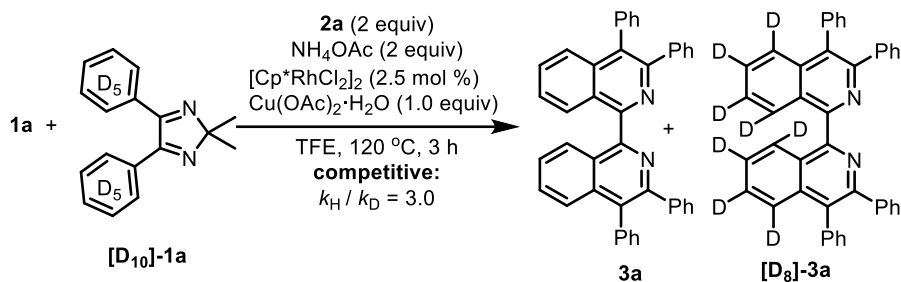

The mixture of  $1\mathbf{a}$  (12.4 mg, 0.05 mmol),  $[\mathbf{D}_{10}]\text{-}1\mathbf{a}$  (12.9 mg, 0.05 mmol),  $\mathbf{2a}$  (0.1 mmol, 17.8 mg, 2 equiv),  $[(\text{Cp}^*\text{RhCl}_2)_2]$  (1.6 mg, 2.5 mol %),  $\text{Cu(OAc)}_2\cdot\text{H}_2\text{O}$  (20 mg, 0.05 mmol, 1 equiv),  $\text{NH}_4\text{OAc}$  (15.4 mg, 0.1 mmol, 2 equiv) and TFE (2 mL) was reacted at 120 °C for 3 h under air. The reaction was cooled down before the solvent was evaporated under reduced pressure. The residue was purified by a neutral aluminum oxide (200–300 mesh) column, eluting with petroleum ether/EtOAc (100/1  $\rightarrow$  50/1, v/v) to afford the mixture of  $\mathbf{3a}$  and  $[\mathbf{D}_8]\text{-}\mathbf{3a}$ . The ratio of  $\mathbf{3a}/([\mathbf{D}_8]\text{-}\mathbf{3a})$  was determined to be 3.0 ( $k_{\text{H}}/k_{\text{D}} \approx 1.5/[2-1.5]=3.0$ ) by  $^1\text{H}$  NMR.

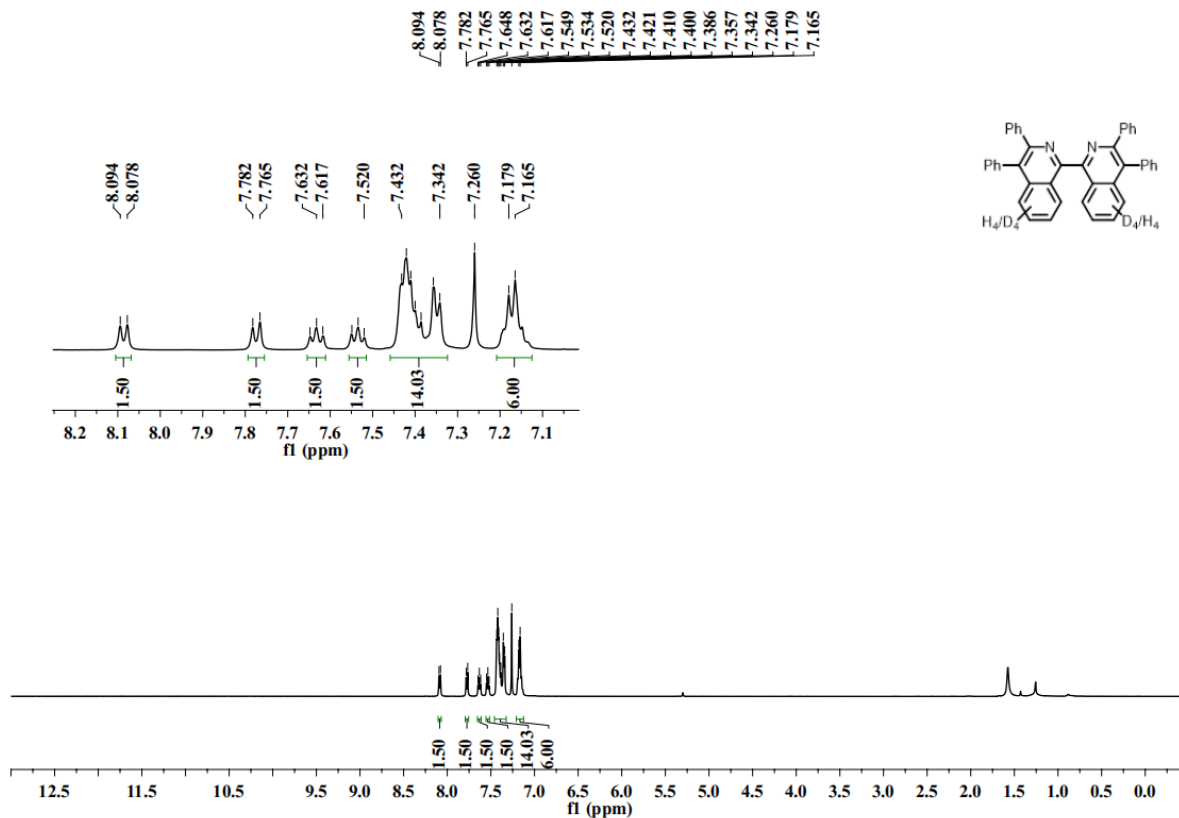



### 4.3 $^{18}\text{O}$ labeling experiment

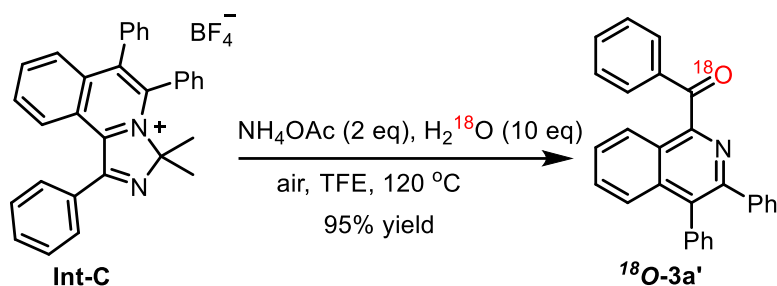

The mixture of **Int-C** (51.2 mg, 0.1 mmol),  $\text{NH}_4\text{OAc}$  (15.4 mg, 0.2 mmol, 2 equiv),  $\text{H}_2^{18}\text{O}$  (18  $\mu\text{L}$ , 1 mmol, 10 equiv) and TFE (2 mL) was reacted at 120  $^\circ\text{C}$  for 12 h under air. The reaction mixture was purified by a silica gel (100–200 mesh) column, eluting with petroleum ether/EtOAc (80/1  $\rightarrow$  40/1, v/v) to afford  **$^{18}\text{O-3a}'$**  as a yellow solid (36.6 mg, 95% yield).

**$^{18}\text{O-3a}'$**  was dissolved in methanol and filtered with a cotton pad, and the filtrate was analyzed by HRMS analysis using Vanquish-Exactive Plus liquid chromatography mass spectrometry (ion trap). HRMS analysis showed that the abundance of  $^{18}\text{O}$  in  **$3\text{a}'$**  was 27%.

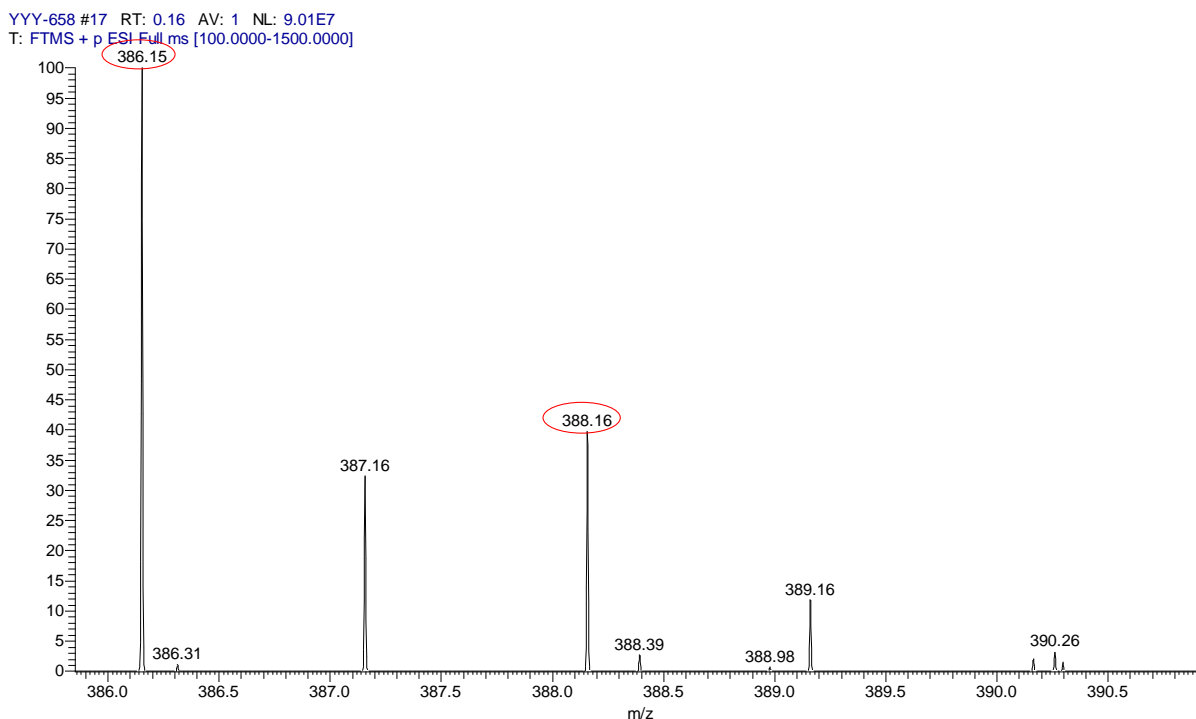

| m/z                       | Relative Natural Abundance (%) | Observed Abundance (%) | Corrected Abundance (%) | Isotopic Enrichment Relative (%) |
|---------------------------|--------------------------------|------------------------|-------------------------|----------------------------------|
| $[\text{M}+\text{H}] + 0$ | 100                            | 100                    | 100                     | 73                               |
| $[\text{M}+\text{H}] + 2$ | 4.4                            | 41.2                   | 36.8                    | 27                               |

#### 4.4 <sup>15</sup>N labeling experiments

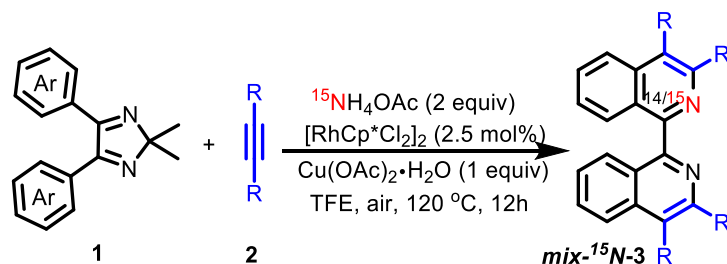

**Synthesis:** The mixture of **1** (0.1 mmol), **2** (0.2 mmol, 2 equiv), [(Cp\*<sup>15</sup>NhCl<sub>2</sub>)<sub>2</sub>] (1.6 mg, 2.5 mol %), Cu(OAc)<sub>2</sub>·H<sub>2</sub>O (20 mg, 0.1 mmol, 1 equiv), <sup>15</sup>NH<sub>4</sub>OAc (15.4 mg, 0.2 mmol, 2 equiv) and TFE (2 mL) was reacted at 120 °C for 10 h under air. The reaction mixture was concentrated under vacuum and the residue was purified by a neutral aluminum oxide (200–300 mesh) column, eluting with petroleum ether/EtOAc (100/1 → 40/1, v/v) to afford product **mix-<sup>15</sup>N-3**.

**<sup>15</sup>N test:** **mix-<sup>15</sup>N-3** was dissolved in methanol and filtered with a cotton pad, and the filtrate was diluted with the methanol and analyzed by HRMS analysis using Vanquish-Exactive Plus liquid chromatography mass spectrometry (ion trap).

**Determination of <sup>15</sup>N Incorporation:** Percent <sup>15</sup>N isotope incorporation was determined by comparison of the mass spectral patterns of <sup>15</sup>N-labeled product versus <sup>14</sup>N-counterpart and calculated by the expressions below.<sup>8</sup>

**% <sup>15</sup>N incorp.** = [(Corrected abundance of <sup>15</sup>N) / (Corrected abundance of <sup>15</sup>N + Observed abundance of <sup>14</sup>N)], where observed abundance of <sup>14</sup>N is obtained from the mass signal intensities at [M] (*m/z*).

**Corrected Abundance of <sup>15</sup>N** = Observed abundance of <sup>15</sup>N – (Observed abundance of <sup>14</sup>N × Relative natural abundance of <sup>15</sup>N / 100), where observed abundance of <sup>15</sup>N is obtained from the mass signal intensities at [M+1] (*m/z*).

#### **Representative Example (mix-<sup>15</sup>N-3a):**

Corrected abundance of <sup>15</sup>N of **3a** = 100 – (91.19 × 45.4/100) = 100 – 41.4 = 58.6%

% <sup>15</sup>N incorp. of **3a** = 58.6 / (58.6+91.19) = 58.6/149.79 = 39 %

1717\_1666685593244\_2210209011 #13 RT: 0.18 AV: 1 NL: 1.12E8  
 T: FTMS + p ESI Full ms [100.0000-1500.0000]

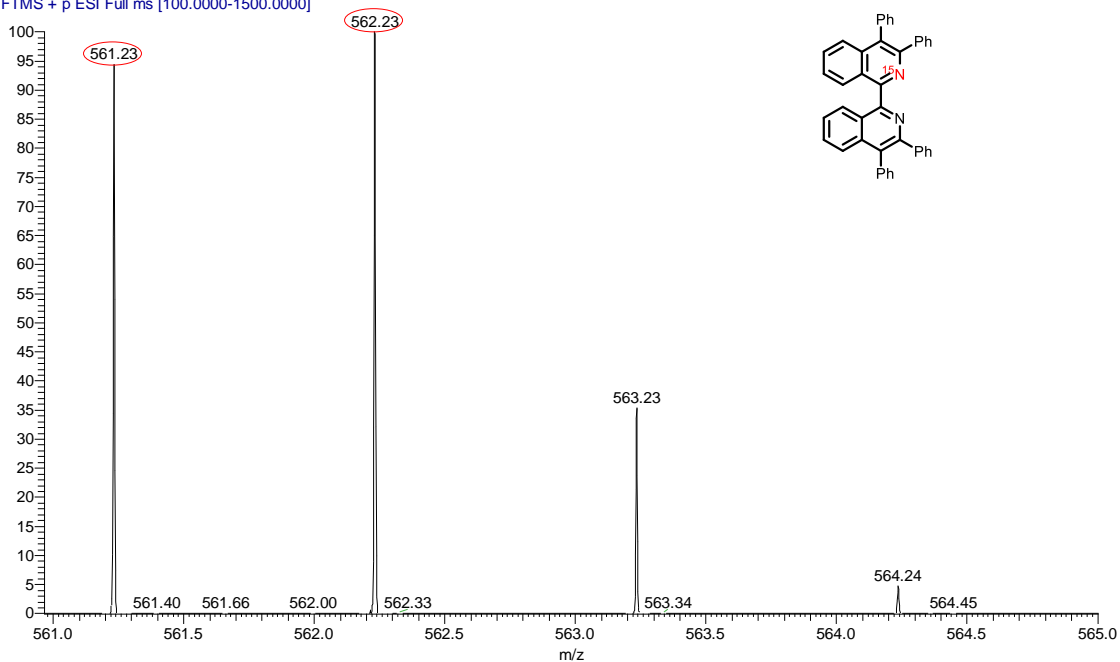

| m/z                    | Relative Natural Abundance (%) | Observed Abundance (%) | Corrected Abundance (%) | Isotopic Enrichment Relative (%) |
|------------------------|--------------------------------|------------------------|-------------------------|----------------------------------|
| [M+H] <sup>+</sup> + 0 | 100                            | 91.19                  | 91.19                   | 61                               |
| [M+H] <sup>+</sup> + 1 | 45.4                           | 100                    | 58.6                    | <b>39</b>                        |

According to above procedure, **mix-<sup>15</sup>N-3a** was obtained as with solid (51.6 mg, 92% yield), and HRMS analysis showed that the abundance of <sup>15</sup>N in **mix-<sup>15</sup>N-3a** was 39%.

YYY-662 #15 RT: 0.14 AV: 1 NL: 5.44E7  
 T: FTMS + p ESI Full ms [100.0000-1500.0000]

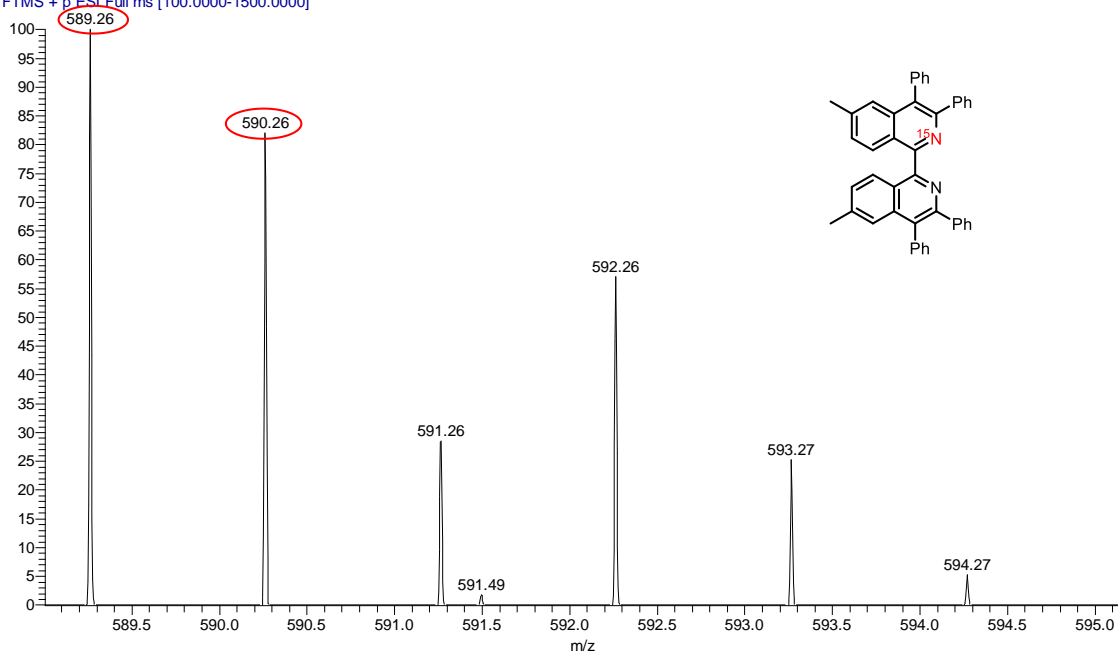

| m/z                    | Relative Natural Abundance (%) | Observed Abundance (%) | Corrected Abundance (%) | Isotopic Enrichment Relative (%) |
|------------------------|--------------------------------|------------------------|-------------------------|----------------------------------|
| [M+H] <sup>+</sup> + 0 | 100                            | 100                    | 100                     | 70                               |
| [M+H] <sup>+</sup> + 1 | 47.6                           | 89.54                  | 41.94                   | <b>30</b>                        |

According to above procedure, **mix-<sup>15</sup>N-3b** was obtained as with solid (33.4 mg, 57% yield), and HRMS analysis showed that the abundance of <sup>15</sup>N in **mix-<sup>15</sup>N-3b** was 30%.

YYY-663 #15 RT: 0.14 AV: 1 NL: 2.10E7  
 T: FTMS + p ESI Full ms [100.0000-1500.0000]

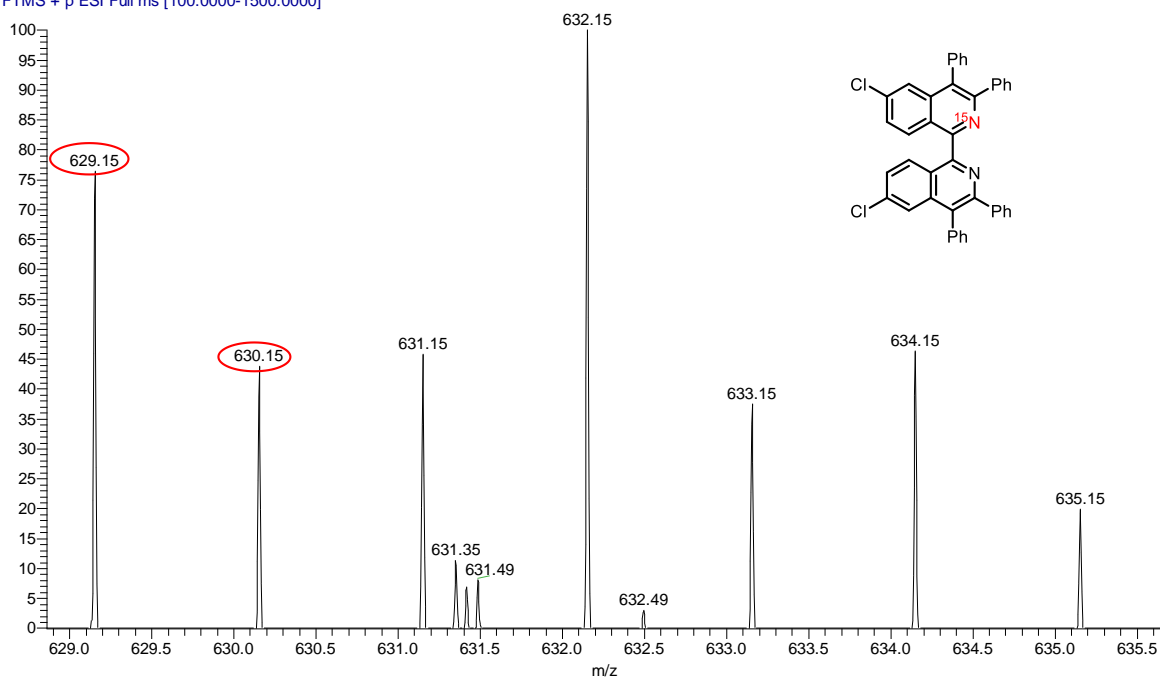

| m/z                  | Relative Natural Abundance (%) | Observed Abundance (%) | Corrected Abundance (%) | Isotopic Enrichment Relative (%) |
|----------------------|--------------------------------|------------------------|-------------------------|----------------------------------|
| [M+H] <sup>+</sup> 0 | 100                            | 78.73                  | 78.73                   | 91                               |
| [M+H] <sup>+</sup> 1 | 45.4                           | 43.97                  | 8.23                    | <b>9</b>                         |

According to above procedure, **mix-<sup>15</sup>N-3c** was obtained as with solid (46.9 mg, 77% yield), and HRMS analysis showed that the abundance of <sup>15</sup>N in **mix-<sup>15</sup>N-3c** was 9%.

YYY-664 #17 RT: 0.16 AV: 1 NL: 2.52E7  
 T: FTMS + p ESI Full ms [100.0000-1500.0000]

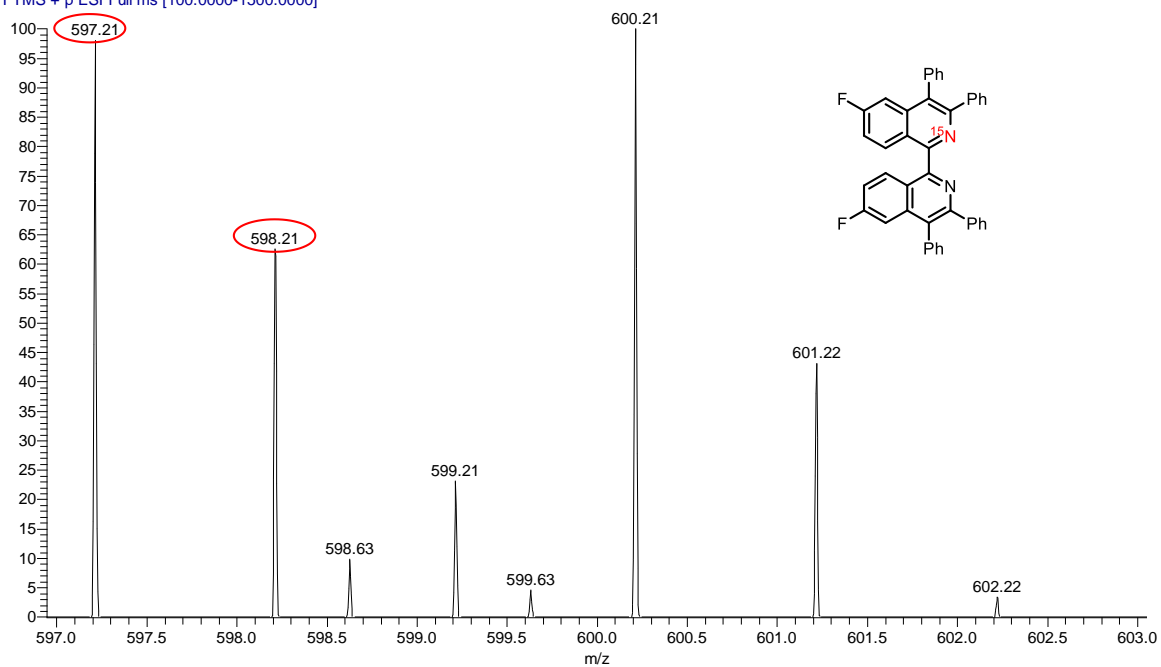

| m/z                  | Relative Natural Abundance (%) | Observed Abundance (%) | Corrected Abundance (%) | Isotopic Enrichment Relative (%) |
|----------------------|--------------------------------|------------------------|-------------------------|----------------------------------|
| [M+H] <sup>+</sup> 0 | 100                            | 100                    | 100                     | 84                               |
| [M+H] <sup>+</sup> 1 | 45.4                           | 64.93                  | 19.53                   | <b>16</b>                        |

According to above procedure, **mix-<sup>15</sup>N-3d** was obtained as with solid (24.3 mg, 41% yield), and HRMS analysis showed that the abundance of <sup>15</sup>N in **mix-<sup>15</sup>N-3d** was 16%.

5-OMe #17 RT: 0.16 AV: 1 NL: 1.34E7  
 T: FTMS + p ESI Full ms [100.0000-1500.0000]

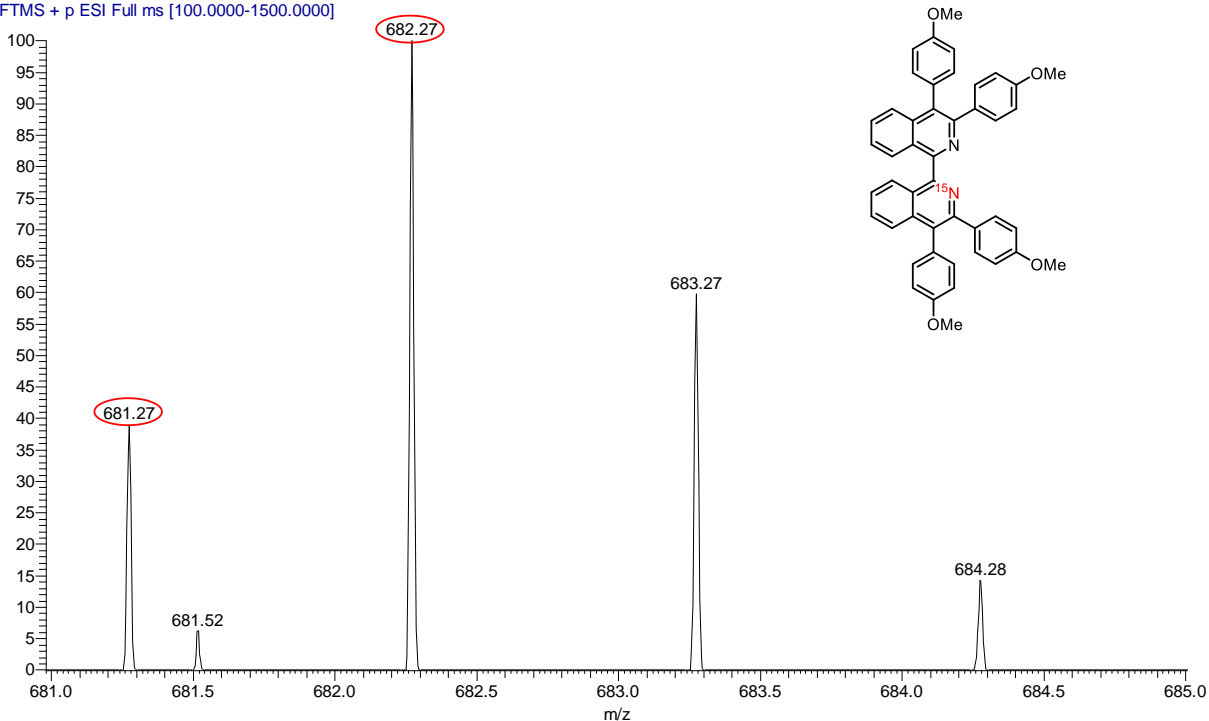

| m/z       | Relative Natural Abundance (%) | Observed Abundance (%) | Corrected Abundance (%) | Isotopic Enrichment Relative (%) |
|-----------|--------------------------------|------------------------|-------------------------|----------------------------------|
| [M+H] + 0 | 100                            | 39.17                  | 39.17                   | 33                               |
| [M+H] + 1 | 49.8                           | 100                    | 80.49                   | <b>67</b>                        |

According to above procedure, **mix-<sup>15</sup>N-3j** was obtained as with solid (32.7 mg, 48% yield), and HRMS analysis showed that the abundance of <sup>15</sup>N in **mix-<sup>15</sup>N-3j** was 67%.

4-Cl #13 RT: 0.12 AV: 1 NL: 5.31E7  
 T: FTMS + p ESI Full ms [100.0000-1500.0000]

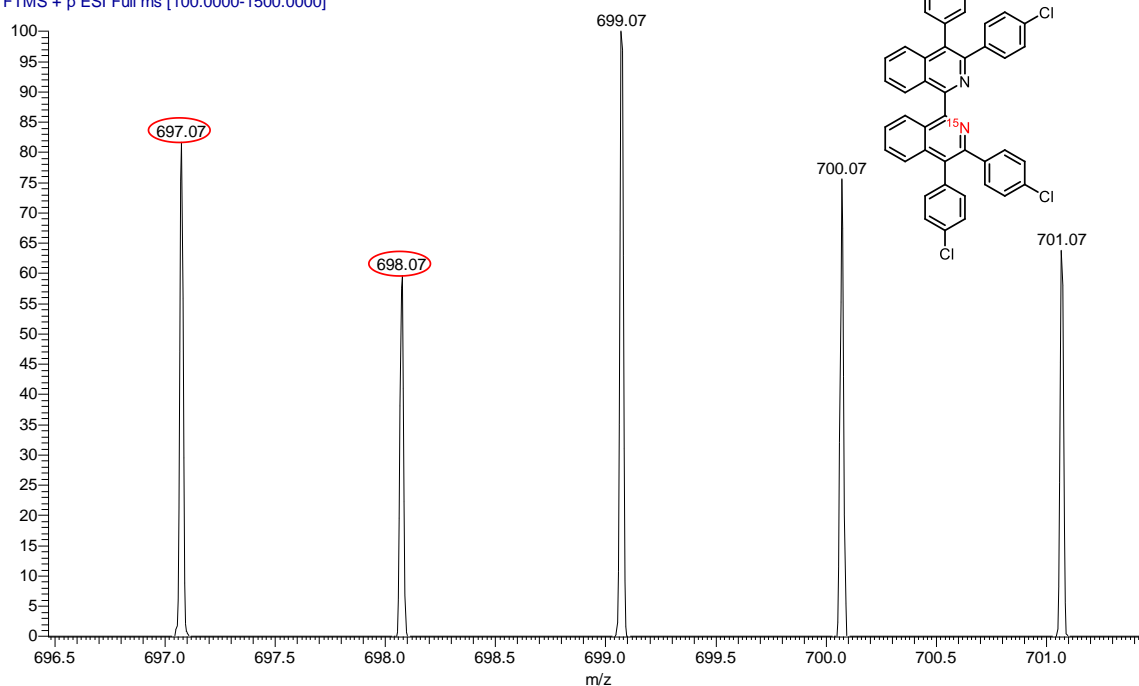

| m/z                    | Relative Natural Abundance (%) | Observed Abundance (%) | Corrected Abundance (%) | Isotopic Enrichment Relative (%) |
|------------------------|--------------------------------|------------------------|-------------------------|----------------------------------|
| [M+H] <sup>+</sup> + 0 | 78.2                           | 80.22                  | 80.22                   | 72                               |
| [M+H] <sup>+</sup> + 1 | 35.5                           | 59.44                  | 30.96                   | <b>28</b>                        |

According to above procedure, **mix-<sup>15</sup>N-3k** was obtained as with solid (44.6 mg, 64% yield), and HRMS analysis showed that the abundance of <sup>15</sup>N in **mix-<sup>15</sup>N-3k** was 28%.



YYY-666 #17 RT: 0.16 AV: 1 NL: 1.24E6  
T: FTMS + n-ESI-Full ms [100.0000-1500.0000]

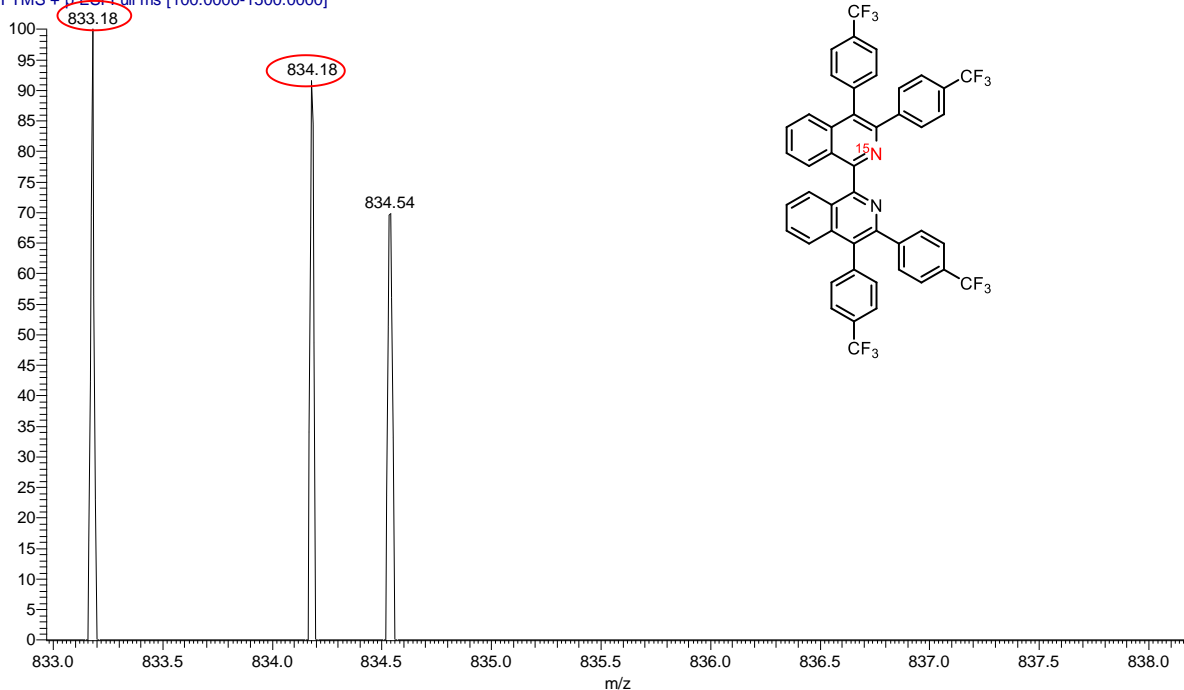

| m/z                    | Relative Natural Abundance (%) | Observed Abundance (%) | Corrected Abundance (%) | Isotopic Enrichment Relative (%) |
|------------------------|--------------------------------|------------------------|-------------------------|----------------------------------|
| [M+H] <sup>+</sup> + 0 | 100                            | 100                    | 100                     | 70                               |
| [M+H] <sup>+</sup> + 1 | 49.8                           | 93.03                  | 43.23                   | <b>30</b>                        |

According to above procedure, **mix-<sup>15</sup>N-3m** was obtained as with solid (60.8 mg, 73% yield), and HRMS analysis showed that the abundance of <sup>15</sup>N in **mix-<sup>15</sup>N-3m** was 30%.

## 5 ESI-MS studies

### 5.1 Detecting the four-component reaction mixture at 30 min

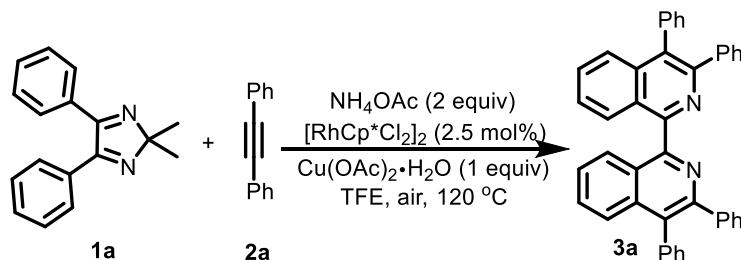

The mixture of **1a** (0.1 mmol), **2a** (0.2 mmol, 2 equiv),  $[(Cp^*RhCl_2)_2]$  (1.6 mg, 2.5 mol%),  $Cu(OAc)_2 \cdot H_2O$  (20 mg, 1 equiv),  $NH_4OAc$  (15.4 mg, 2 equiv) and TFE (2 mL) was stirred at 120 °C for 0.5 h under air. After 0.5 h, the reaction mixture was filtered with a cotton pad, and the

filtrate was diluted with the methanol and analyzed by HRMS analysis using Vanquish-Exactive Plus liquid chromatography mass spectrometry (ion trap) without any purification. The HRMS spectrum clearly displays the intermediates, **Cp\*(OAc)Rh<sup>+</sup>**, **Int-A**, **Int-B**, **Int-C**, **Int-F**, **Int-G**, **3a'**, and **3a**.

*Table S3 ESI-MS data found at 30 min*

| Intermediates                                 | Formula                                           | Calculated | Observed |
|-----------------------------------------------|---------------------------------------------------|------------|----------|
| <b>Cp*(OAc)Rh<sup>+</sup> [M]<sup>+</sup></b> | C <sub>12</sub> H <sub>18</sub> O <sub>2</sub> Rh | 297.04     | 297.03   |
| <b>Int-A [M]<sup>+</sup></b>                  | C <sub>27</sub> H <sub>30</sub> N <sub>2</sub> Rh | 485.15     | 485.14   |
| <b>Int-B [M]<sup>+</sup></b>                  | C <sub>41</sub> H <sub>40</sub> N <sub>2</sub> Rh | 663.22     | 663.22   |
| <b>Int-C [M]<sup>+</sup></b>                  | C <sub>31</sub> H <sub>25</sub> N <sub>2</sub>    | 425.20     | 425.20   |
| <b>Int-F [M]<sup>+</sup></b>                  | C <sub>45</sub> H <sub>33</sub> N <sub>2</sub>    | 601.26     | 601.26   |
| <b>Int-G [M + H]<sup>+</sup></b>              | C <sub>28</sub> H <sub>21</sub> N <sub>2</sub>    | 385.17     | 385.17   |
| <b>3a' [M + H]<sup>+</sup></b>                | C <sub>28</sub> H <sub>20</sub> NO                | 386.15     | 386.15   |
| <b>3a [M + H]<sup>+</sup></b>                 | C <sub>42</sub> H <sub>29</sub> N <sub>2</sub>    | 561.23     | 561.23   |

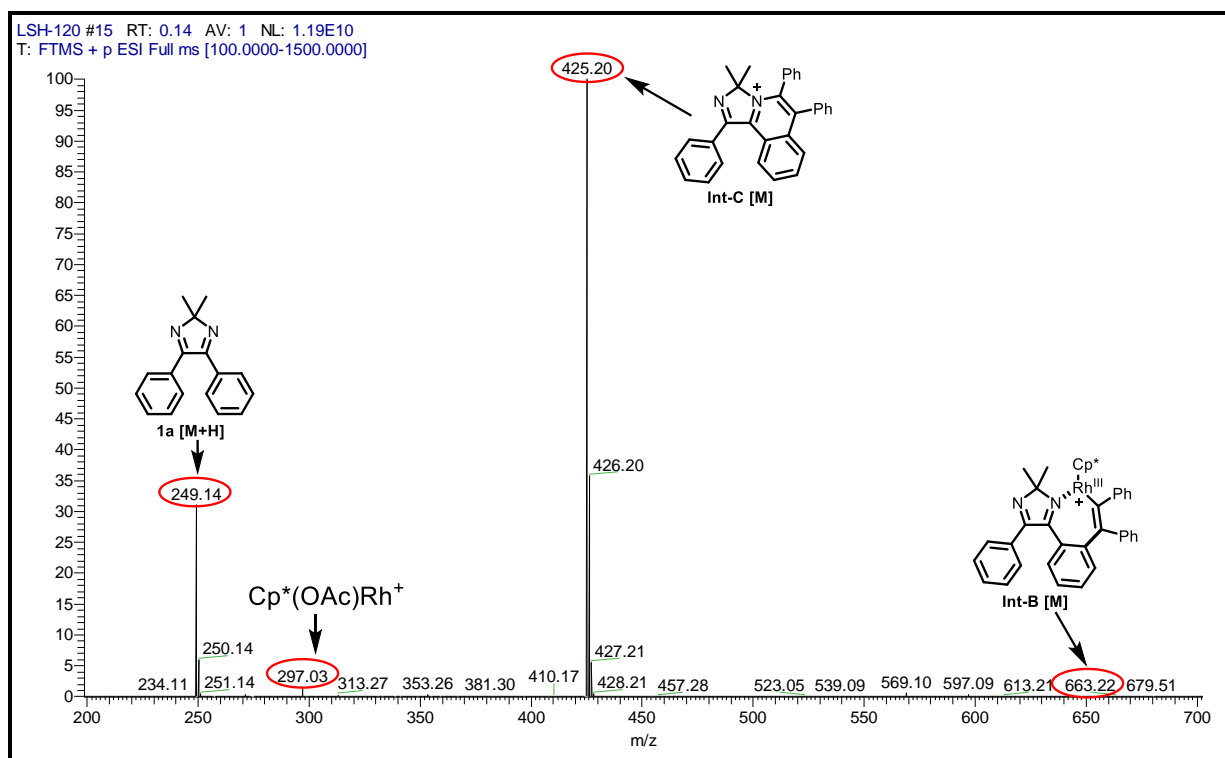

LSH-120 #17 RT: 0.16 AV: 1 NL: 2.75E7  
T: FTMS + p ESI Full ms [100.0000-1500.0000]

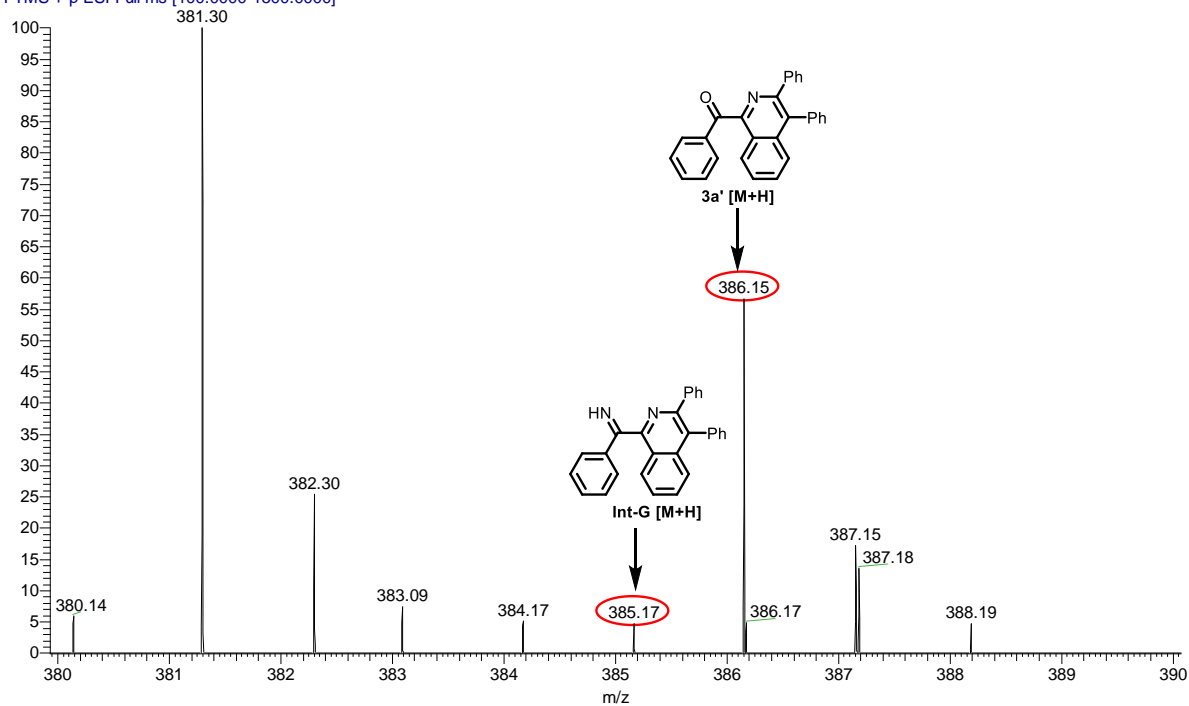

LSH-120 #29 RT: 0.27 AV: 1 NL: 1.30E7  
T: FTMS + p ESI Full ms [100.0000-1500.0000]

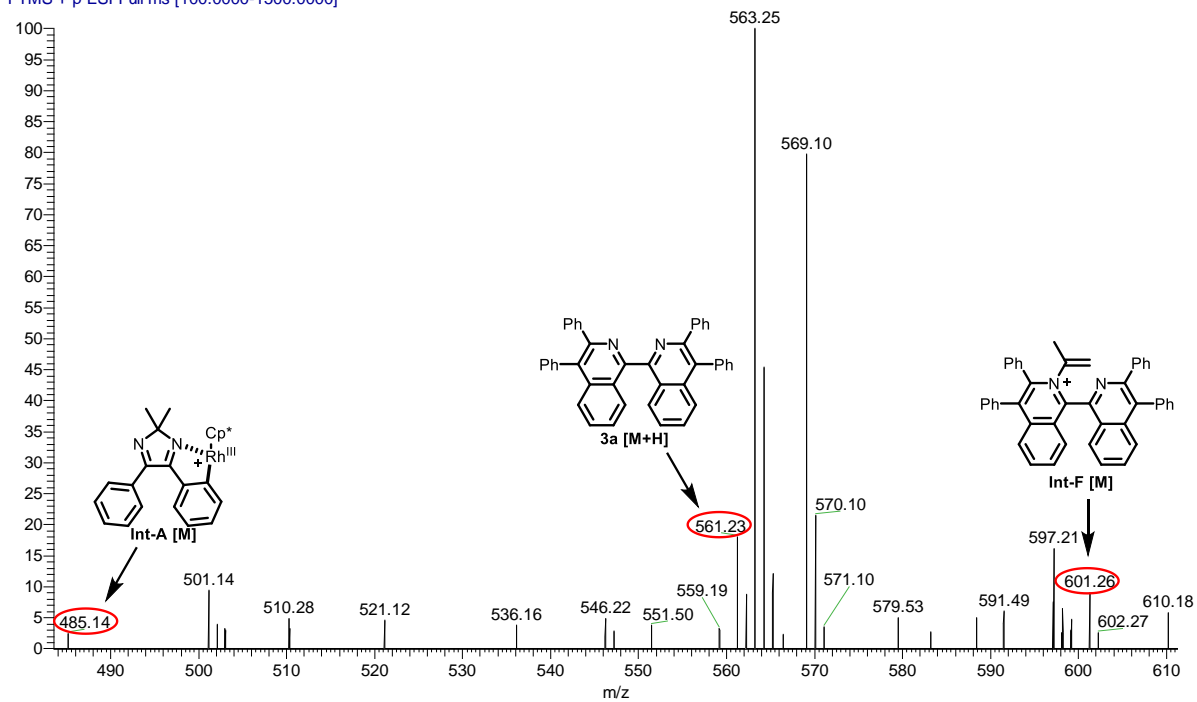

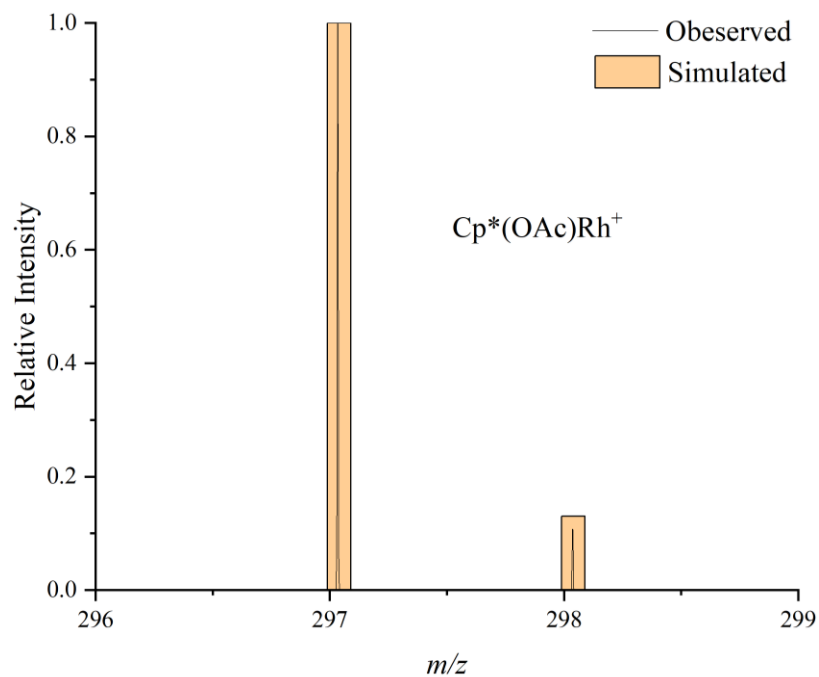

**Figure S1** Isotopic distribution vs the mass spectrum simulated for  $\text{Cp}^*(\text{OAc})\text{Rh}^+$

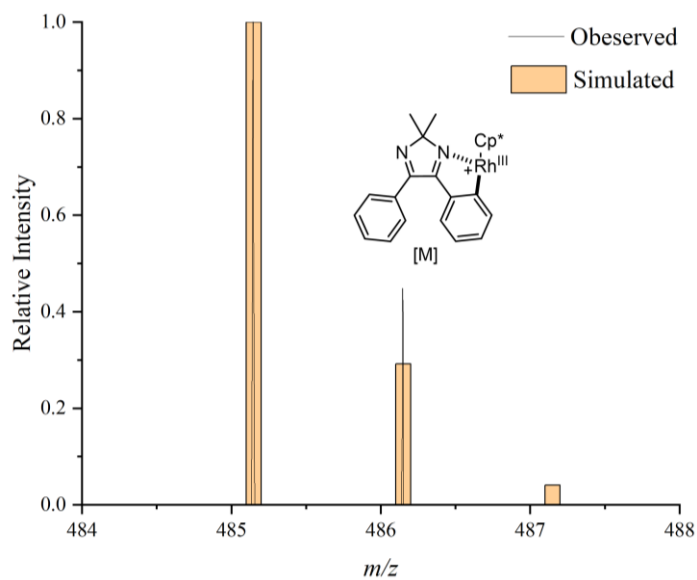

**Figure S2** Isotopic distribution vs the mass spectrum simulated for *Int-A*

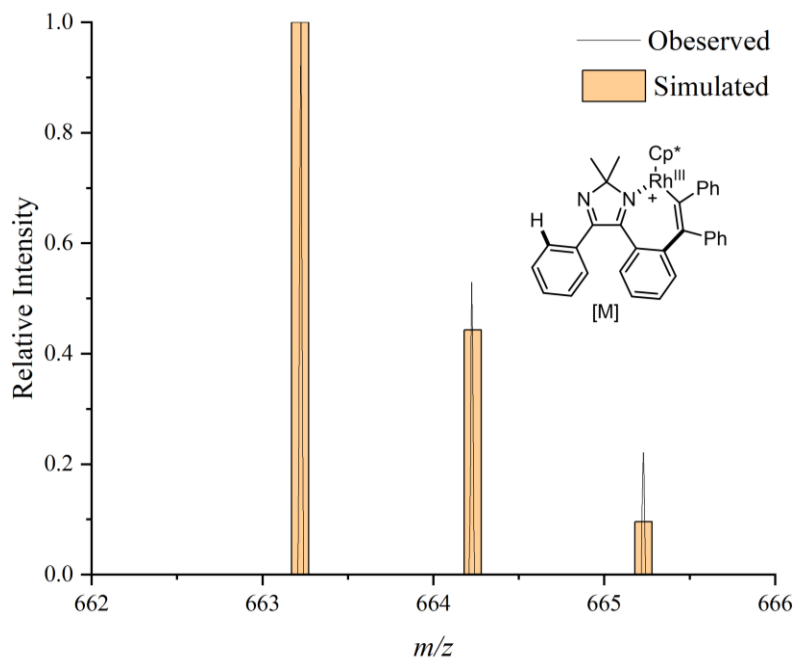

**Figure S3** Isotopic distribution vs the mass spectrum simulated for **Int-B**

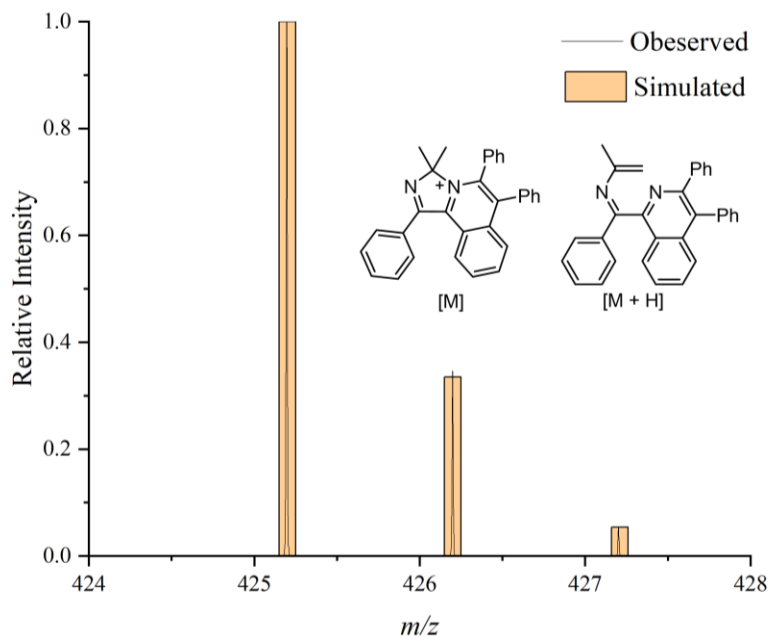

**Figure S4** Isotopic distribution vs the mass spectrum simulated for **Int-C/ Int-C'**

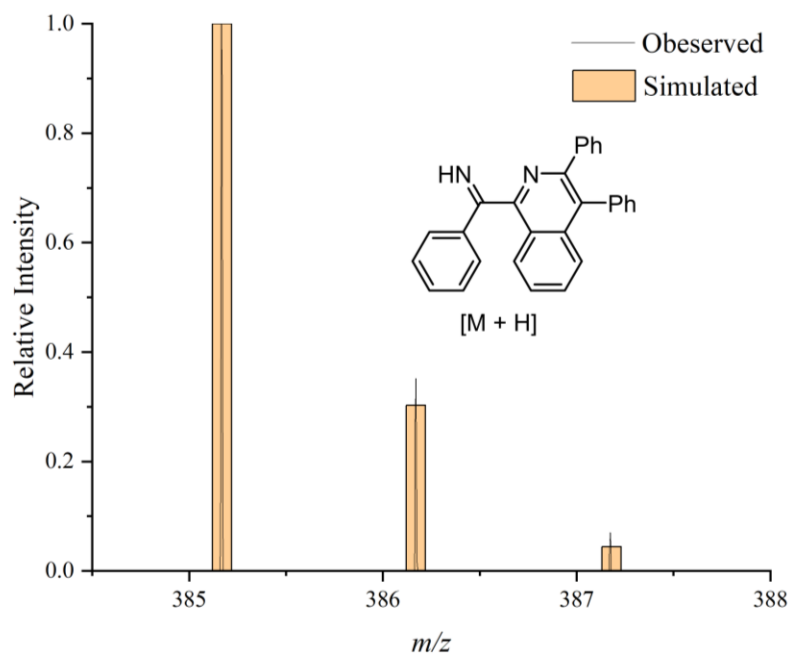

**Figure S5** Isotopic distribution vs the mass spectrum simulated for **Int-G**

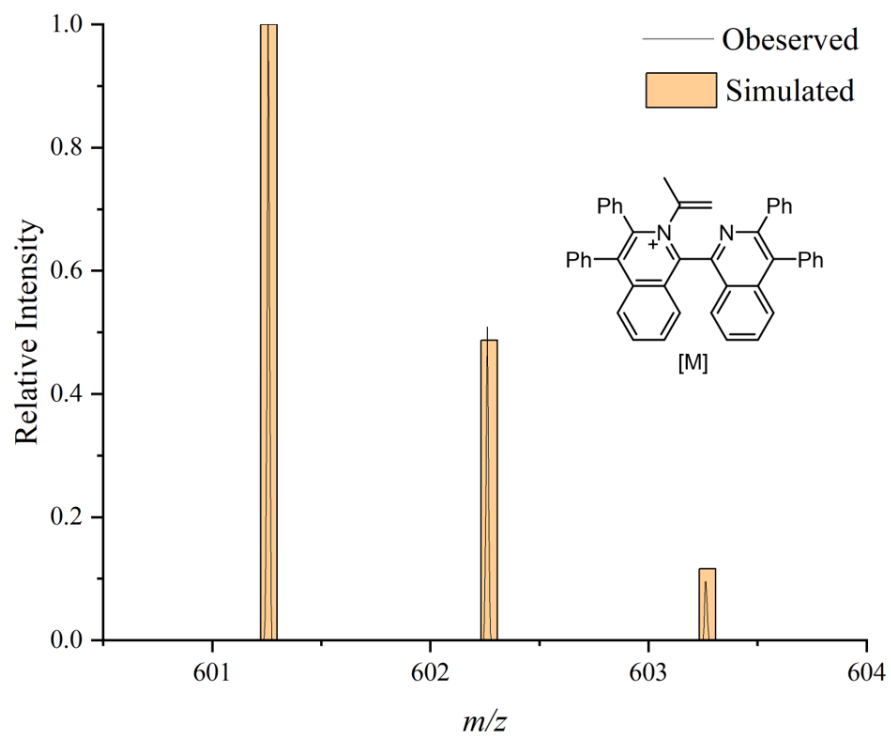

**Figure S6** Isotopic distribution vs the mass spectrum simulated for **Int-F**

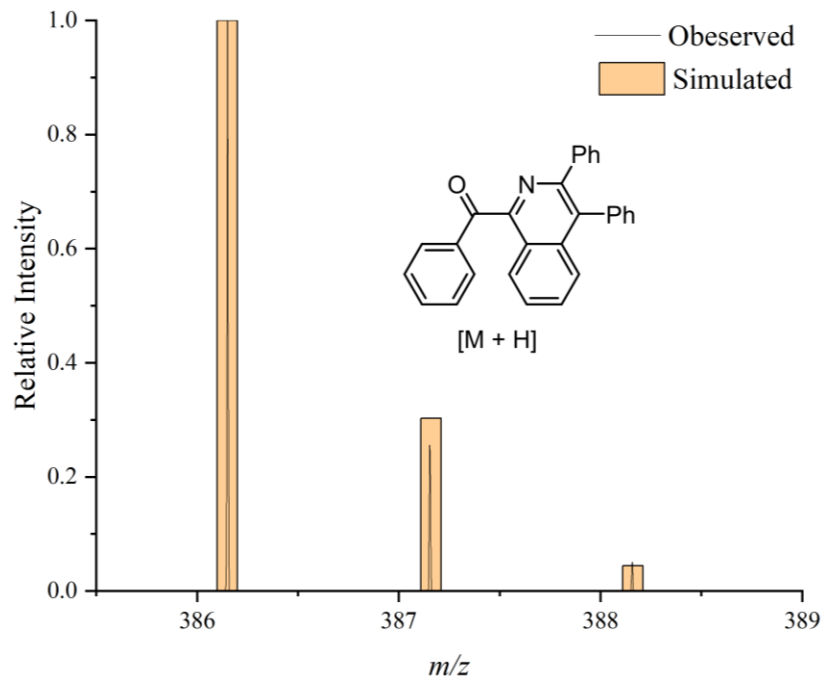

**Figure S7** Isotopic distribution vs the mass spectrum simulated for **3a'**

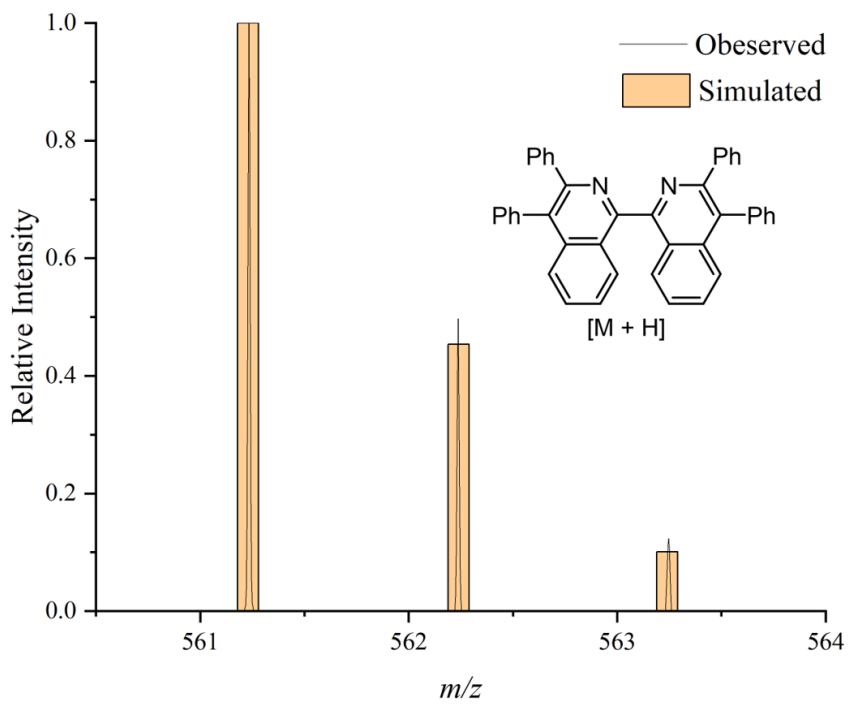

**Figure S8** Isotopic distribution vs the mass spectrum simulated for **3a**

## 5.2 Detecting the six-component reaction mixture in the presence of $^{15}\text{NH}_4\text{OAc}$

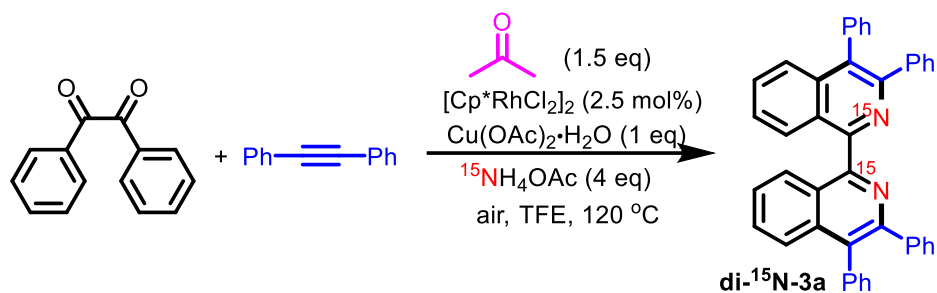

The mixture of benzil (10.5 mg, 0.05 mmol), diphenylacetylene (17.8 mg, 0.1 mmol, 2 equiv), acetone (0.075 mmol, 1.5 equiv),  $[\text{Cp}^*\text{RhCl}_2]_2$  (0.8 mg, 2.5 mol%),  $\text{Cu(OAc)}_2\cdot\text{H}_2\text{O}$  (10 mg, 0.05 mmol, 1 equiv),  $\text{NH}_4\text{OAc}$  (15.4 mg, 0.2 mmol, 4 equiv) and TFE (1 mL) was stirred at 120 °C for 5 h under air. After 5 h, the reaction mixture was filtered with a cotton pad, and the filtrate was diluted with the methanol and analysed by HRMS analysis using Vanquish-Exactive Plus liquid chromatography mass spectrometry (ion trap) without any purification. The HRMS spectrum clearly displays the intermediates,  $\text{Cp}^*(\text{OAc})\text{Rh}^+$ , *di- $^{15}\text{N}$ -1a*, *di- $^{15}\text{N}$ -Int-C*,  *$^{15}\text{N}$ -3a'*, *di- $^{15}\text{N}$ -Int-F*, and *di- $^{15}\text{N}$ -3a*.

**Table S4** ESI-MS data found for six-component reaction in the presence of  $^{15}\text{NH}_4\text{OAc}$

| Intermediates                                                          | Formula                                         | Calculated | Observed |
|------------------------------------------------------------------------|-------------------------------------------------|------------|----------|
| <b><math>\text{Cp}^*(\text{OAc})\text{Rh}^+</math> [M]<sup>+</sup></b> | $\text{C}_{12}\text{H}_{18}\text{O}_2\text{Rh}$ | 297.04     | 297.04   |
| <i>di-<math>^{15}\text{N}</math>-1a</i> [M + H] <sup>+</sup>           | $\text{C}_{17}\text{H}_{17}^{15}\text{N}_2$     | 251.13     | 251.13   |
| <i>di-<math>^{15}\text{N}</math>-Int-C</i> [M] <sup>+</sup>            | $\text{C}_{31}\text{H}_{25}^{15}\text{N}_2$     | 427.20     | 427.19   |
| <i><math>^{15}\text{N}</math>-3a'</i> [M + H] <sup>+</sup>             | $\text{C}_{28}\text{H}_{20}^{15}\text{NO}$      | 387.15     | 387.15   |
| <i>di-<math>^{15}\text{N}</math>-Int-F</i> [M] <sup>+</sup>            | $\text{C}_{45}\text{H}_{33}^{15}\text{N}_2$     | 603.26     | 603.26   |
| <i>di-<math>^{15}\text{N}</math>-3a</i> [M + H] <sup>+</sup>           | $\text{C}_{42}\text{H}_{29}^{15}\text{N}_2$     | 563.23     | 563.22   |



LSH-2-N15 #13 RT: 0.12 AV: 1 NL: 1.68E7  
T: FTMS + p ESI Full ms [100.0000-1500.0000]

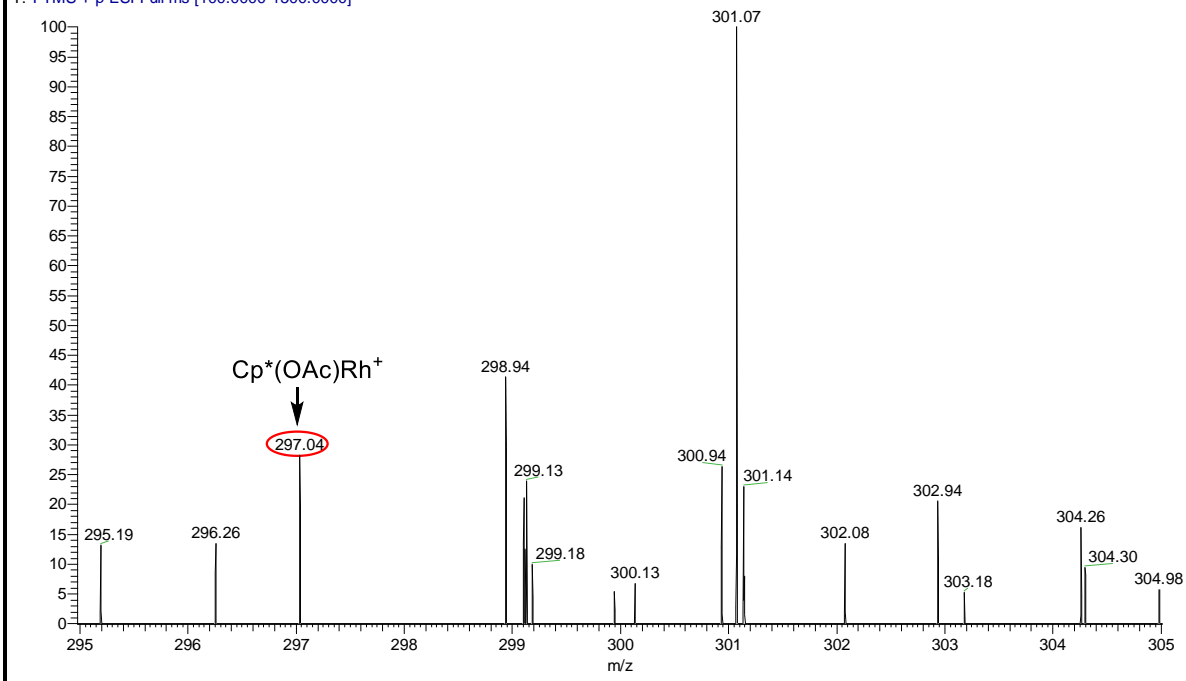

LSH-2-N15 #13 RT: 0.12 AV: 1 NL: 8.10E9  
T: FTMS + p ESI Full ms [100.0000-1500.0000]

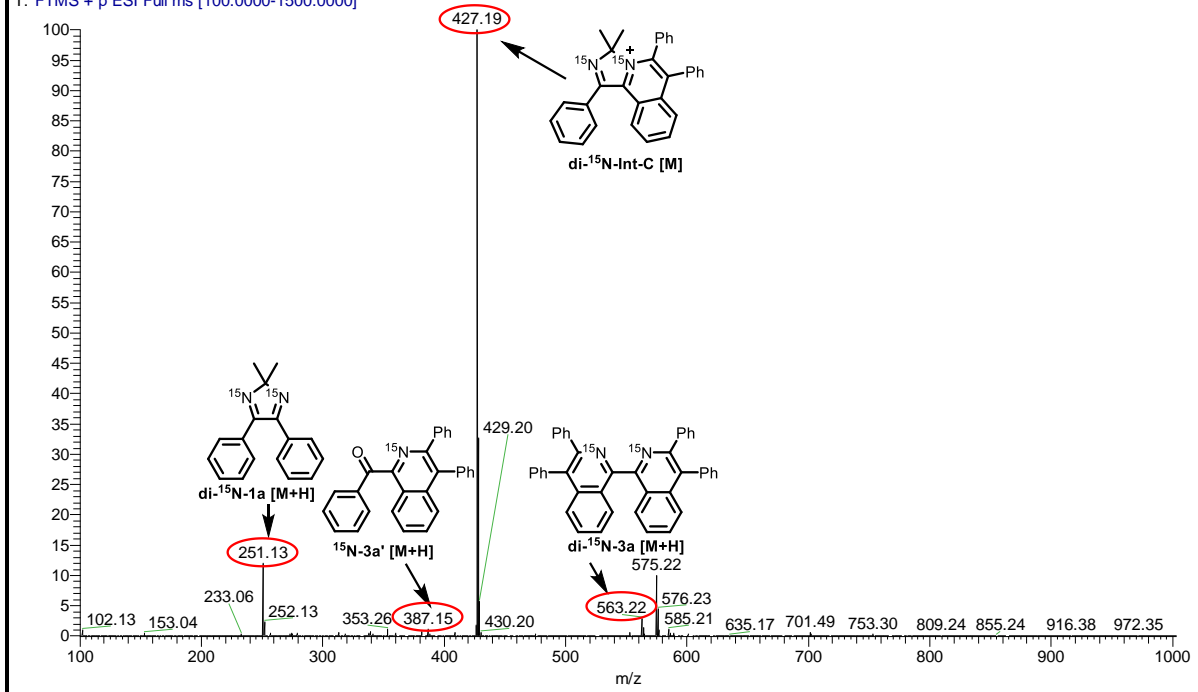

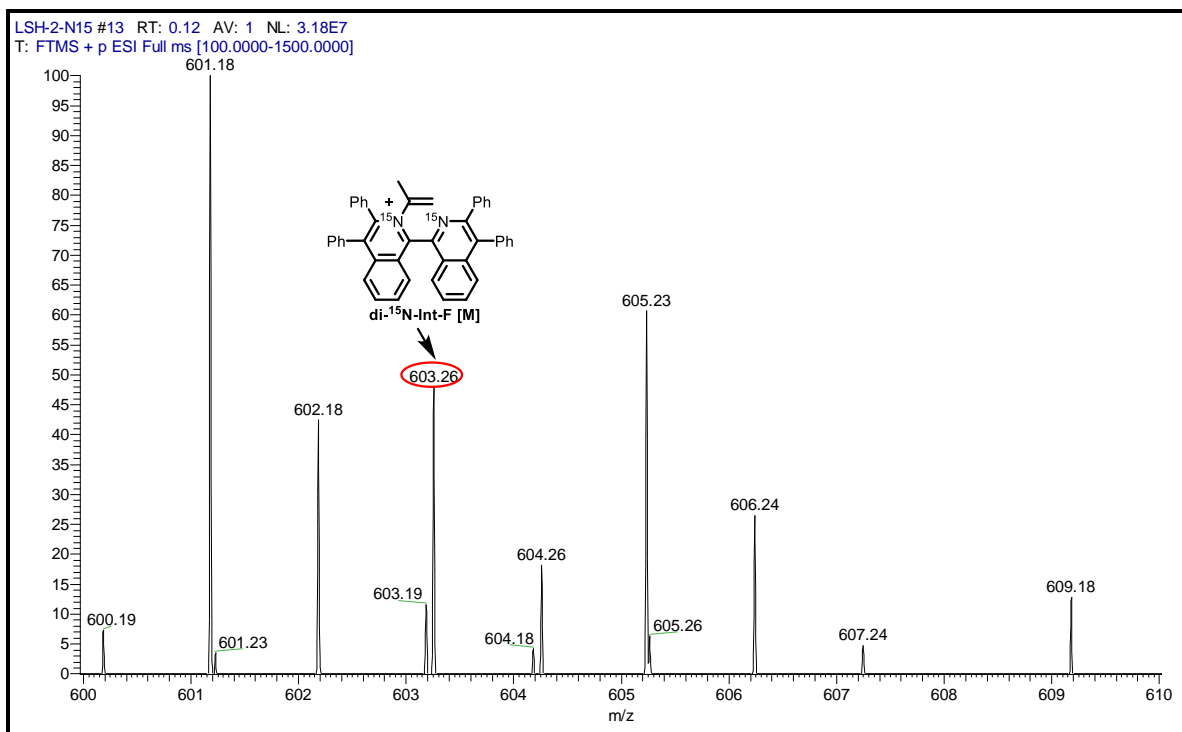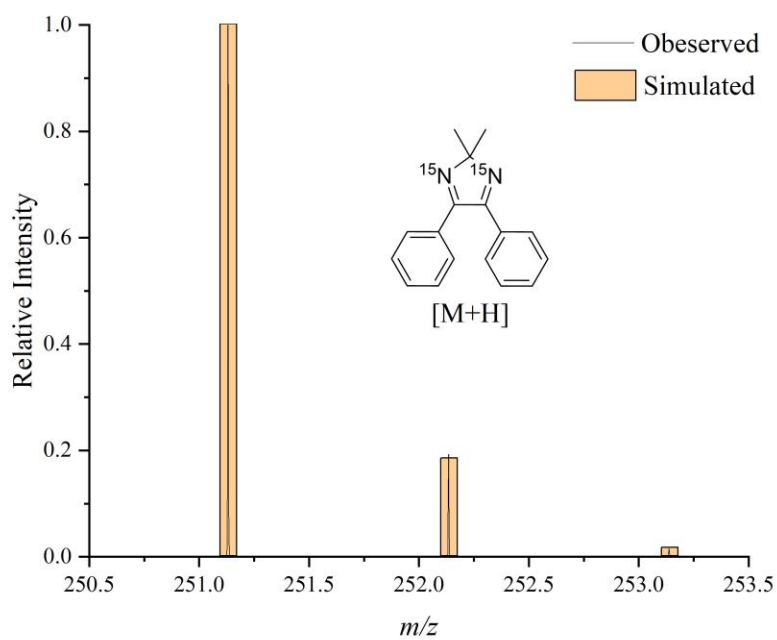

**Figure S9** Isotopic distribution vs the mass spectrum simulated for di-<sup>15</sup>N-1a

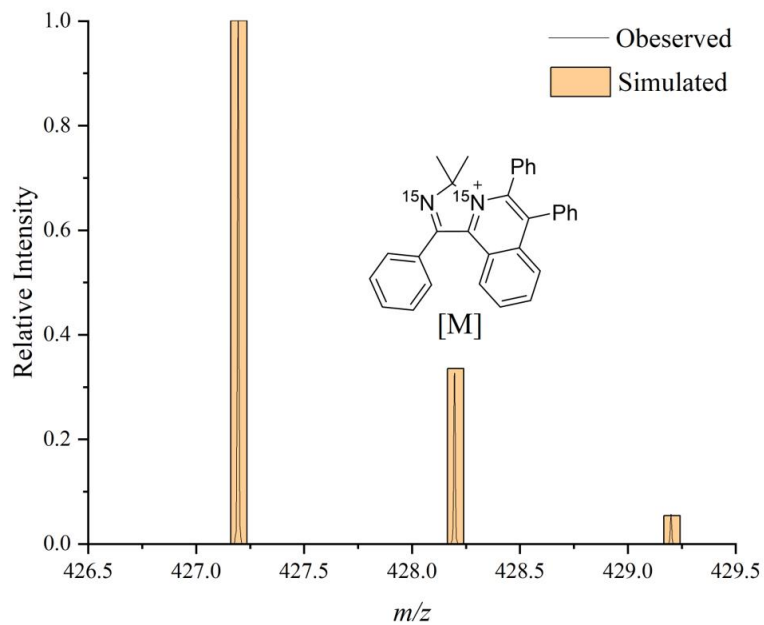

**Figure S10** Isotopic distribution vs the mass spectrum simulated for  $di-^{15}N-Int-C$

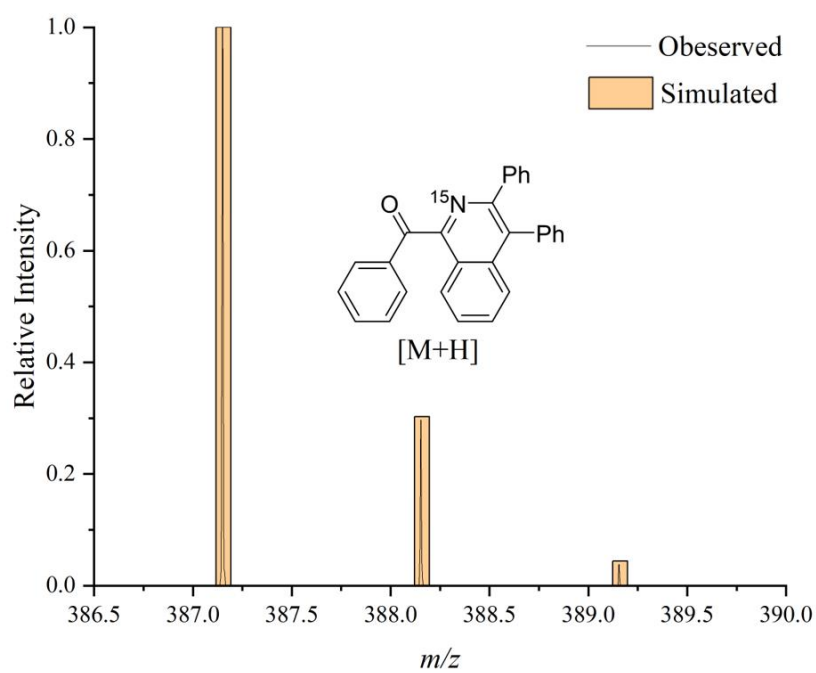

**Figure S11** Isotopic distribution vs the mass spectrum simulated for  $^{15}N-3a'$

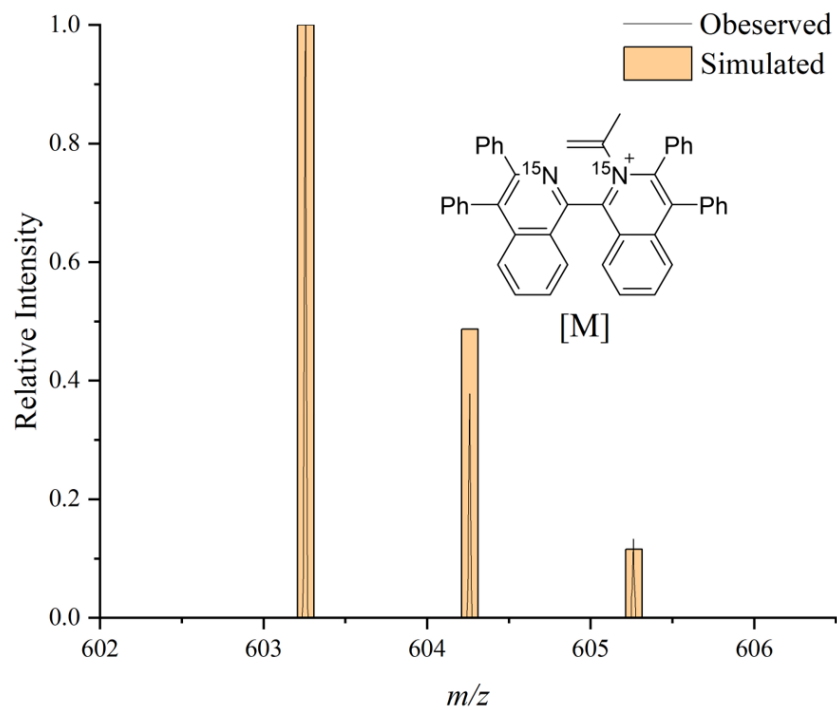

**Figure S12** Isotopic distribution vs the mass spectrum simulated for *di*-<sup>15</sup>N-Int-F

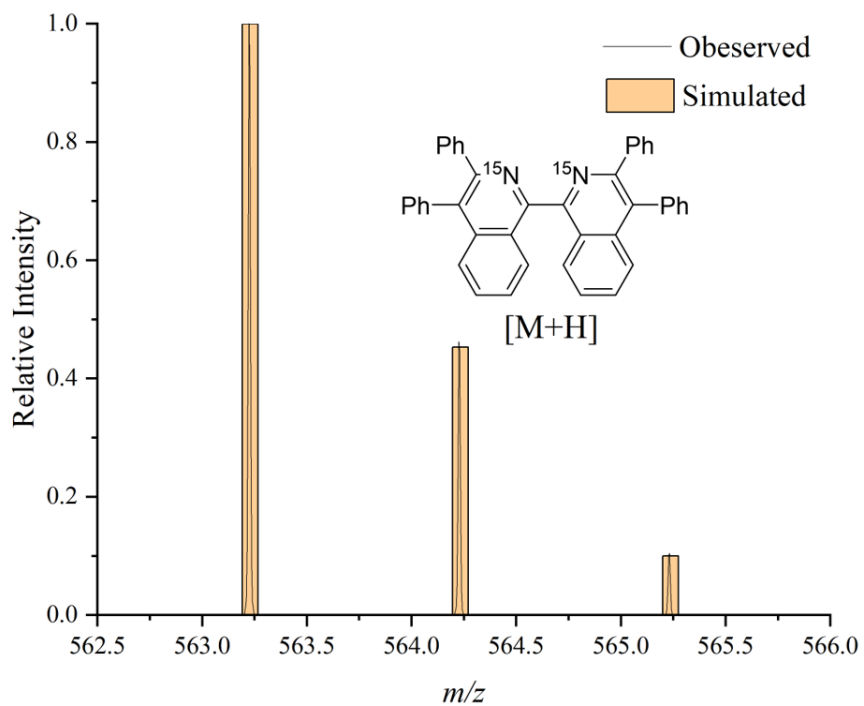

**Figure S13** Isotopic distribution vs the mass spectrum simulated for *di*-<sup>15</sup>N-3a

### 5.3 Time-dependent ESI-MS to monitor the reaction process

#### (1) In neutral system:

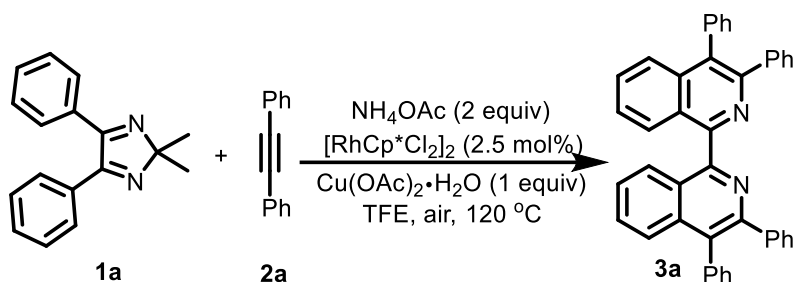

The mixture of **1a** (24.8 mg, 0.1 mmol), **2a** (35.6 mg, 0.2 mmol, 2 equiv),  $[(\text{Cp}^*\text{RhCl}_2)_2]$  (1.6 mg, 2.5 mol%),  $\text{Cu}(\text{OAc})_2 \cdot \text{H}_2\text{O}$  (20 mg, 0.1 mmol, 1 equiv),  $\text{NH}_4\text{OAc}$  (15.4 mg, 0.2 mmol, 2 equiv) and TFE (2 mL) was stirred at room temperature for 5 min under air, then moved to heat at  $120\text{ }^\circ\text{C}$ . At the reaction time of 5 min (rt), 0.5 h ( $120\text{ }^\circ\text{C}$ ), 2 h ( $120\text{ }^\circ\text{C}$ ), 6 h ( $120\text{ }^\circ\text{C}$ ), 10 h ( $120\text{ }^\circ\text{C}$ ) and 12 h ( $120\text{ }^\circ\text{C}$ ), the reaction mixture was extracted with a micro injector. The reaction mixture was diluted with methanol and filtered by cotton pad, and the filtrate was analyzed by HRMS analysis using Vanquish-Exactive Plus liquid chromatography mass spectrometry (ion trap) without any purification. The Time-dependent ESI-MS spectrum clearly showed the change trend in the relative intensity of intermediates (Table S5).

**Table S5** Intensity of the intermediates according to time in ESI-MS

|                 | 5 min      | 0.5 h       | 2 h         | 6 h         | 10 h       | 12 h       |
|-----------------|------------|-------------|-------------|-------------|------------|------------|
| <b>1a</b>       | 8659657728 | 3711735296  | 628686144   | 147309856   | 79096224   | 78157600   |
| <b>Int-A</b>    | 3228962.5  | 192570.4    | 133243      | 25267.8     | 20237.8    | 19962.7    |
| <b>Int-B</b>    | 4197236    | 1869430.4   | Not found   | Not found   | Not found  | Not found  |
| <b>Int-C/C'</b> | 4948361216 | 11091359744 | 14646522880 | 11478876160 | 6540953088 | 6532972032 |
| <b>Int-F</b>    | Not found  | 6585557.5   | 32953764    | 63775988    | 104018872  | 101017182  |
| <b>Int-G</b>    | 2418946.8  | 890194.1    | 1707117     | 1274590.9   | 840716.5   | 983024.1   |
| <b>3a'</b>      | 32065688   | 16364353    | 17705166    | 17394136    | 11195047   | 11828096   |
| <b>3a</b>       | Not found  | 18205718    | 238285584   | 314316960   | 355185088  | 495769408  |

#### 5.4 Time-dependent ESI-MS in the synthesis of mix-<sup>15</sup>N-3a

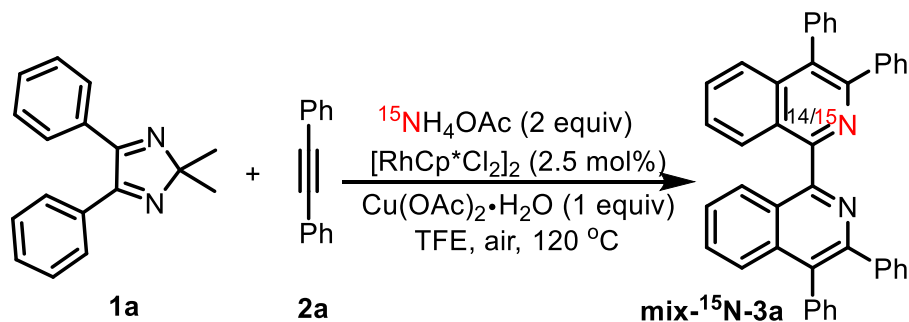

The mixture of **1a** (24.8 mg, 0.1 mmol), **2a** (35.6 mg, 0.2 mmol, 2 equiv),  $[(\text{Cp}^*\text{RhCl}_2)_2]$  (1.6 mg, 2.5 mol%),  $\text{Cu}(\text{OAc})_2 \cdot \text{H}_2\text{O}$  (20 mg, 0.1 mmol, 1 equiv),  $^{15}\text{NH}_4\text{OAc}$  (15.6 mg, 0.2 mmol, 2 equiv) and TFE (2 mL) was stirred at room temperature for 5 min under air, then moved to heat at 120 °C. At the reaction time of 5 min, 2 h, 4 h, 6 h, 8 h, 10 h, and 12 h, the reaction mixture was extracted with a micro injector. The reaction mixture was diluted with methanol and filtered by cotton pad, and the filtrate was analyzed by HRMS analysis using Vanquish-Exactive Plus liquid chromatography mass spectrometry (ion trap) without any purification. The  $^{15}\text{N}$ -labeling ratio of **3a** was clearly tracked by the time-dependent ESI-MS.

**Table S6.** Intensity of the peak ( $[M+H]$  and  $[M+H+1]$ ) according to time in ESI-MS

|                       | 5 min    | 2 h       | 4 h       | 6 h       | 8 h       | 10 h      | 12 h      |
|-----------------------|----------|-----------|-----------|-----------|-----------|-----------|-----------|
| Intensity             | 41763176 | 114854160 | 259384320 | 302288096 | 348470784 | 428523776 | 449511648 |
| $[M+H]$               | 561.23   | 561.23    | 561.23    | 561.23    | 561.23    | 561.23    | 561.23    |
| Intensity             | 47364584 | 128923232 | 273356576 | 320238272 | 389003424 | 340005760 | 526074144 |
| $[M+H+1]$             | 562.23   | 562.23    | 562.23    | 562.23    | 562.23    | 562.23    | 562.23    |
| $^{15}\text{N}$ ratio | 40.5%    | 40.1%     | 37.5%     | 37.7%     | 39.8%     | 41.4%     | 41.7%     |

#### (2) In acidic system:

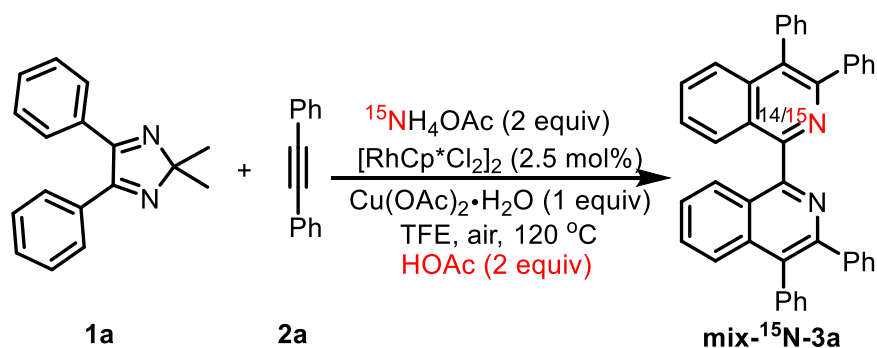

The mixture of **1a** (24.8 mg, 0.1 mmol), **2a** (35.6 mg, 0.2 mmol, 2 equiv), [(Cp\**RhCl*<sub>2</sub>)<sub>2</sub>] (1.6 mg, 2.5 mol%), Cu(OAc)<sub>2</sub>·H<sub>2</sub>O (20 mg, 0.1 mmol, 1 equiv), <sup>15</sup>NH<sub>4</sub>OAc (15.6 mg, 0.2 mmol, 2 equiv), HOAc (11 μl, 0.2 mmol, 2 equiv) and TFE (2 mL) was stirred at room temperature for 5 min under air, then moved to heat at 120 °C. At the reaction time of 5 min, 2 h, 4 h, 6 h, 8 h, 10 h, and 12 h, the reaction mixture was extracted with a micro injector. The reaction mixture was diluted with methanol and filtered by cotton pad, and the filtrate was analyzed by HRMS analysis using Vanquish-Exactive Plus liquid chromatography mass spectrometry (ion trap) without any purification. The <sup>15</sup>N-labeling ratio of **3a** was clearly tracked by the time-dependent ESI-MS.

**Table S7.** Intensity of the peak (*[M+H]* and *[M+H+1]*) according to time in ESI-MS when adding HOAc

|                       | 5 min    | 2 h      | 4 h      | 6 h      | 8 h       | 10 h     | 12 h      |
|-----------------------|----------|----------|----------|----------|-----------|----------|-----------|
| Intensity             | 17051444 | 27897696 | 48938864 | 56579532 | 5178050.5 | 79532904 | 90193704  |
| <b>[M+H]</b>          | 561.23   | 561.23   | 561.23   | 561.23   | 561.23    | 561.23   | 561.23    |
| Intensity             | 13669079 | 17924206 | 34024300 | 49847268 | 4290084.5 | 74332088 | 103594040 |
| <b>[M+H+1]</b>        | 562.23   | 562.23   | 562.23   | 562.23   | 562.23    | 562.23   | 562.23    |
| <sup>15</sup> N ratio | 41.3%    | 35.1%    | 37.3%    | 43.8%    | 42.1%     | 45.5%    | 50.8%     |

### (3) In basic system:

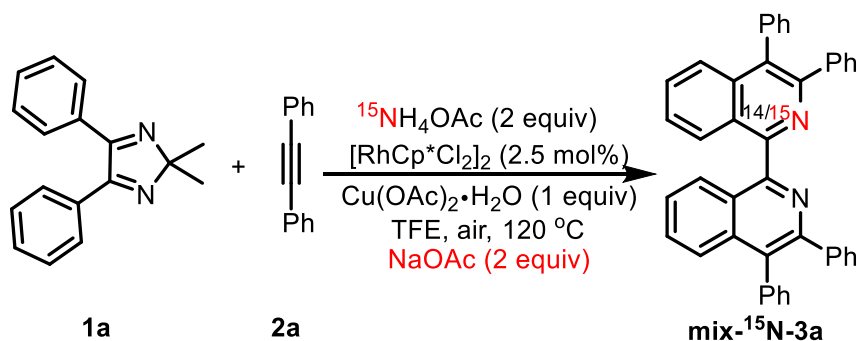

The mixture of **1a** (24.8 mg, 0.1 mmol), **2a** (35.6 mg, 0.2 mmol, 2 equiv), [(Cp\**RhCl*<sub>2</sub>)<sub>2</sub>] (1.6 mg, 2.5 mol%), Cu(OAc)<sub>2</sub>·H<sub>2</sub>O (20 mg, 0.1 mmol, 1 equiv), <sup>15</sup>NH<sub>4</sub>OAc (15.6 mg, 0.2 mmol, 2 equiv), NaOAc (16.4 mg, 0.2 mmol, 2 equiv) and TFE (2 mL) was stirred at room temperature for 5 min under air, then moved to heat at 120 °C. At the reaction time of 5 min, 2 h, 4 h, 6 h, 8 h, 10 h, and 12 h, the reaction mixture was extracted with a micro injector. The reaction mixture was diluted with methanol and filtered by cotton pad, and the filtrate was analyzed by HRMS analysis

using Vanquish-Exactive Plus liquid chromatography mass spectrometry (ion trap) without any purification. The  $^{15}\text{N}$ -labeling ratio of **3a** was clearly tracked by the time-dependent ESI-MS.

**Table S8.** Intensity of the peak ( $[M+H]$  and  $[M+H+1]$ ) according to time in ESI-MS when adding NaOAc

|                       | 5 min     | 2 h       | 4 h      | 6 h      | 8 h      | 10 h     | 12 h     |
|-----------------------|-----------|-----------|----------|----------|----------|----------|----------|
| Intensity             | 6533618.5 | 4917115.5 | 10278779 | 33717960 | 26260442 | 30985018 | 31880254 |
| $[M+H]$               | 561.23    | 561.23    | 561.23   | 561.23   | 561.23   | 561.23   | 561.23   |
| Intensity             | 2505176.3 | 2001445.8 | 34024300 | 19582682 | 18282992 | 18008446 | 18475614 |
| $[M+H+1]$             | 562.23    | 562.23    | 562.23   | 562.23   | 562.23   | 562.23   | 562.23   |
| $^{15}\text{N}$ ratio | 22.0%     | 23.4%     | 27.1%    | 37.3%    | 32.4%    | 32.4%    | 32.4%    |

## 6 Synthetic applications

### 6.1 Scale-up reactions (1 mmol)

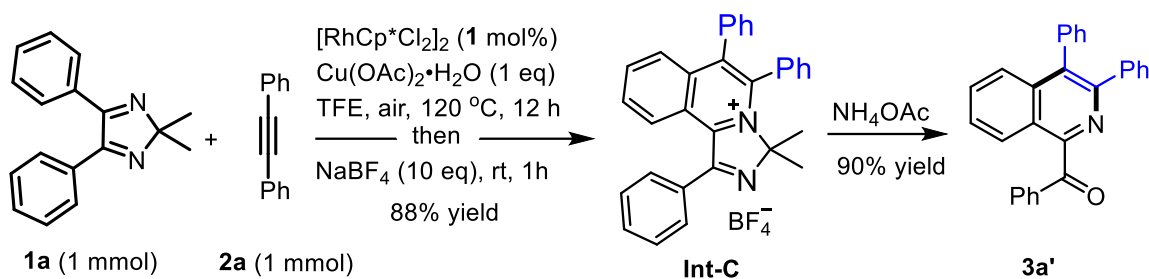

**Synthesis of Int-C.** The mixture of 2*H*-imidazole **1a** (248 mg, 1 mmol), alkyne **2a** (178 mg, 1 mmol, 1equiv),  $[(\text{Cp}^*\text{RhCl}_2)_2]$  (6 mg, 1 mol%),  $\text{Cu}(\text{OAc})_2 \cdot \text{H}_2\text{O}$  (200 mg, 1 mmol, 2 equiv), and TFE (10 mL) was stirred at 120 °C for 12 h under air. Then,  $\text{NaBF}_4$  (110 mg, 2 mmol, 10 equiv), was added to the reaction mixture, stir at room temperature for 1 h. After reaction completed, the mixture was concentrated under vacuum and the residue was purified by a silica gel (100–200 mesh) column, eluting with  $\text{CH}_2\text{Cl}_2/\text{CH}_3\text{OH}$  (80/1 → 10/1, v/v) to afford **Int-C** as a yellow solid (451 mg, 88% yield).

**Synthesis of 3a'.** A solution of **Int-C** (451 mg, 0.88 mmol),  $\text{NH}_4\text{OAc}$  (136 mg, 1.76 mmol, 2 equiv) and TFE (9 mL) was reacted at 120 °C for 12 h under air. The solvent was removed under vacuum and the residue was purified by a silica gel (100–200 mesh) column, eluting with petroleum ether/EtOAc (100/1 → 80/1, v/v) to afford **3a'** as a white solid (305 mg, 90% yield).



## 6.2 General procedure for the synthesis of 1,1'-biisoquinolinium salts **7**

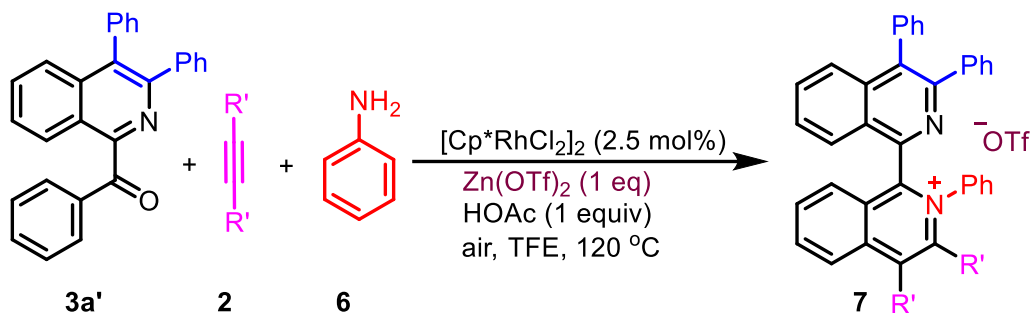

The mixture of **3a'** (38.5 mg, 0.1 mmol), alkyne **2** (0.1 mmol, 1 equiv), [(Cp\*RhCl<sub>2</sub>)<sub>2</sub>] (1.6 mg, 2.5 mol%), aniline **6** (14 mg, 1.5 mmol, 1.5 equiv), Zn(OTf)<sub>2</sub> (36.4 mg, 0.1 mmol, 1 equiv), HOAc (6 μL, 0.1 mmol, 1 equiv) and TFE (2 mL) was reacted at 120 °C for 12 h under air. The reaction mixture was concentrated under vacuum and the residue was purified by a silica gel (200–300 mesh) column, eluting with CH<sub>2</sub>Cl<sub>2</sub>/CH<sub>3</sub>OH (80/1 → 8/1, v/v) to afford salts **7**.

## 6.3 Synthesis of trisubstituted 1,1'-biisoquinoline **8**

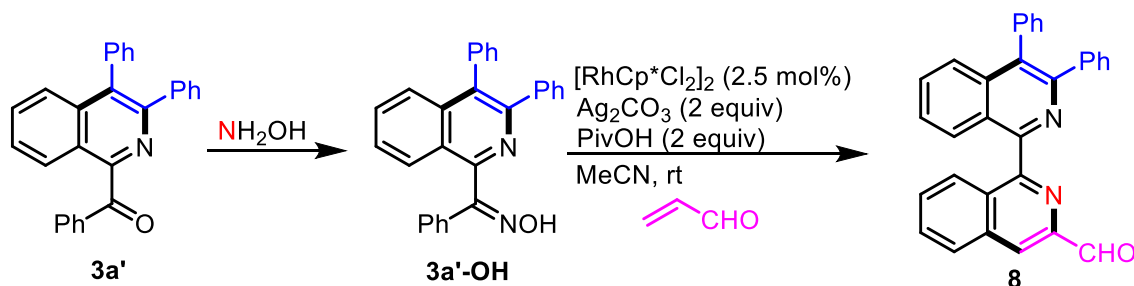

To a dry Schlenk tube with a magnetic stir bar was added **3a'** (77.1 mg, 0.2 mmol), NH<sub>2</sub>OH · HCl (34.7 mg, 0.5 mmol, 2.5 equiv), pyridine (23.7 mg, 0.3 mmol, 1.5 equiv) and EtOH (2 mL). The mixture was stirred at 90 °C for 10 h. After cooling down to room temperature, a large amount of solid is precipitated. The precipitate was collected by filtration and washed with EtOH (2 mL) to afford (3,4-diphenylisoquinolin-1-yl)(phenyl)methanone oxime **3a'-OH** as a white solid (73.6 mg, 92% yield).

Then, **3a'-OH** (40 mg, 0.1 mmol), acrolein (16.8 mg, 0.3 mmol, 3 equiv), [(Cp\*RhCl<sub>2</sub>)<sub>2</sub>] (1.3 mg, 2.0 mol%), Ag<sub>2</sub>CO<sub>3</sub> (55.1 mg, 2 equiv), PivOH (20.4 mg, 2 equiv) and MeCN (1 mL) were added to a dry Schlenk tube for stirring at room temperature for 18 h under air. The residue was

purified by a silica gel (100–200 mesh) column, eluting with petroleum ether/EtOAc (10/1, v/v) to afford **8** as a yellowish solid (20.1 mg, 46%).

#### 6.4 Synthesis of **3a** from furoxan **9**

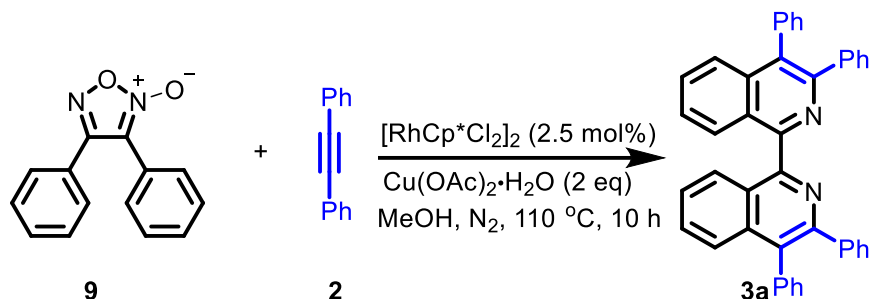

To a dry Schlenk tube with a magnetic stir bar was added furoxan **9** (23.8 mg, 0.1 mmol), alkyne **2a** (35.6 mmol, 0.2 mmol, 2 equiv),  $[(\text{Cp}^*\text{RhCl}_2)_2]$  (1.6 mg, 2.5 mol%),  $\text{Cu}(\text{OAc})_2 \cdot \text{H}_2\text{O}$  (40 mg, 0.2 mmol, 2 equiv), and MeOH (2 mL). The reaction mixture was stirred at 110 °C for 10 h under nitrogen atmosphere before concentrated under vacuum. The residue was purified by a neutral aluminum oxide (200–300 mesh) column, eluting with petroleum ether/EtOAc (40/1 → 8/1, v/v) to afford **3a** as a white solid (47.6 mg, 84%).

#### 6.5 Synthesis of **3a** from diimine **10**

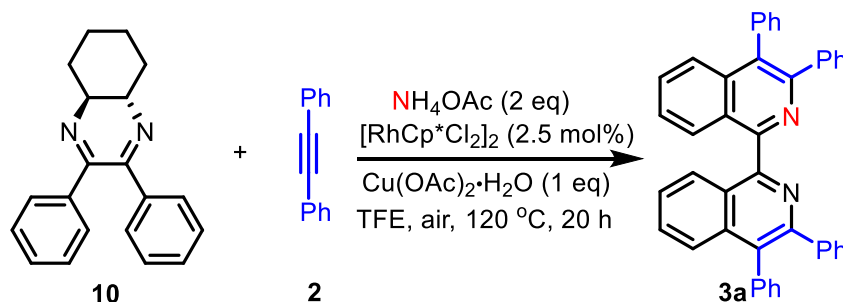

The mixture of **10** (28.8 mg, 0.1 mmol), alkyne **2a** (35.6 mmol, 0.2 mmol, 2 equiv),  $[(\text{Cp}^*\text{RhCl}_2)_2]$  (1.6 mg, 2.5 mol%),  $\text{Cu}(\text{OAc})_2 \cdot \text{H}_2\text{O}$  (20 mg, 0.1 mmol, 1 equiv),  $\text{NH}_4\text{OAc}$  (15.4 mg, 0.2 mmol, 2 equiv) and TFE (2 mL) was stirred at 120 °C for 20 h under air. The reaction mixture was concentrated under vacuum and the residue was purified by a neutral aluminum oxide (200–300 mesh) column, eluting with petroleum ether/EtOAc (40/1 → 8/1, v/v) to afford **3a** as a white solid (17.0 mg, 30% yield). While **3a** was not detected when  $\text{NH}_4\text{OAc}$  was absent.

## 6.5 Synthesis of di-<sup>15</sup>N-**3a** with full <sup>15</sup>N-labeling

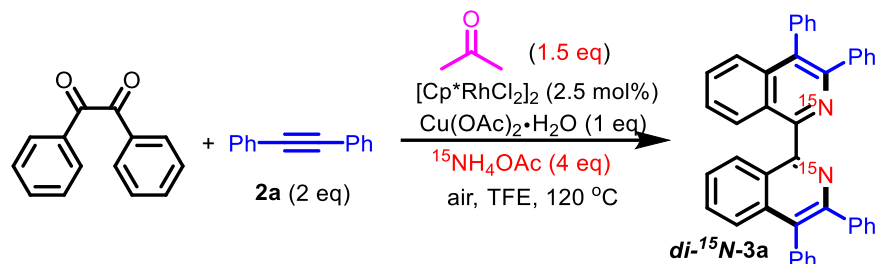

The mixture of benzil (21 mg, 0.1 mmol), **2a** (35.6 mmol, 0.2 mmol, 2 equiv), acetone (1.5 mmol, 1.5 equiv), [(Cp\*RhCl<sub>2</sub>)<sub>2</sub>] (1.6 mg, 2.5 mol %), Cu(OAc)<sub>2</sub>·H<sub>2</sub>O (20 mg, 0.1 mmol, 1 equiv), <sup>15</sup>NH<sub>4</sub>OAc (30.8 mg, 0.4 mmol, 4 equiv) and TFE (2 mL) was reacted at 120 °C for 12h under air. The reaction mixture was purified by a neutral aluminum oxide (200–300 mesh) column, eluting with petroleum ether/EtOAc (80/1 → 8/1, v/v) to afford **di-<sup>15</sup>N-3a** as a white solid (28 mg, 50% yield). The <sup>15</sup>N ratio was determined by HRMS analysis using Vanquish-Exactive Plus liquid chromatography mass spectrometry (ion trap). HRMS analysis showed that the abundance of <sup>15</sup>N in **3a** was close to 100%.

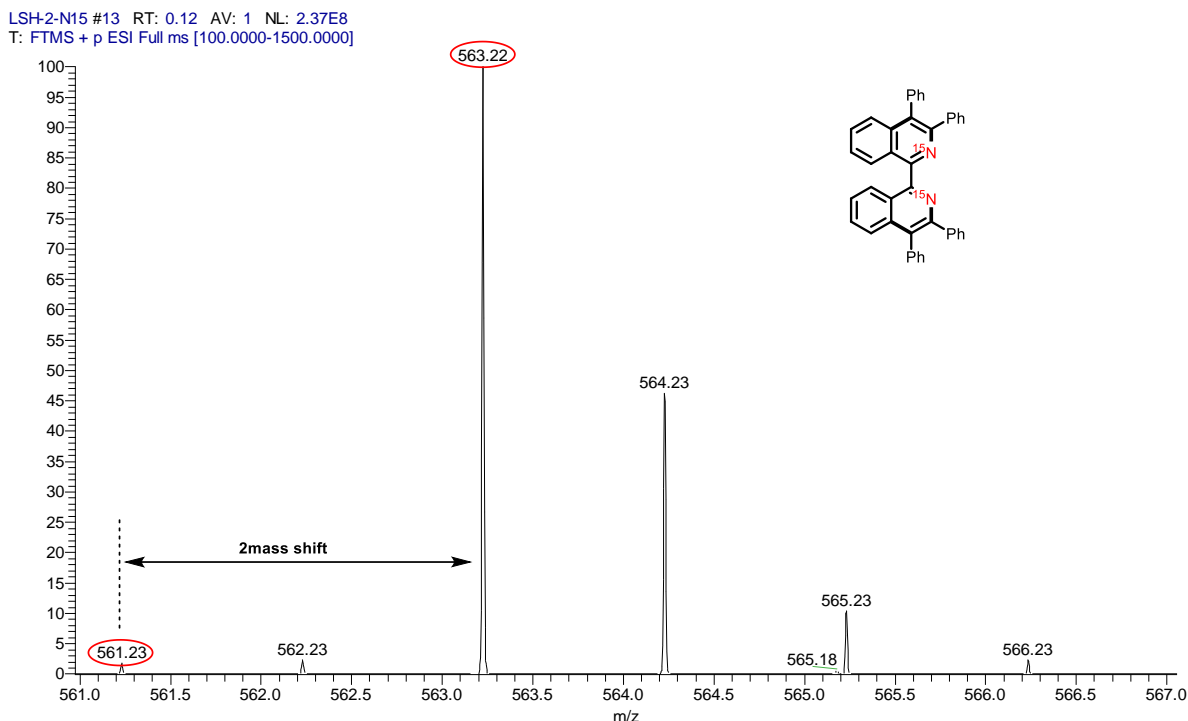

**Figure S14** ESI-MS of **di-<sup>15</sup>N-3a**

## 6.6 Synthesis of mono-<sup>15</sup>N-3a with full <sup>15</sup>N-labeling

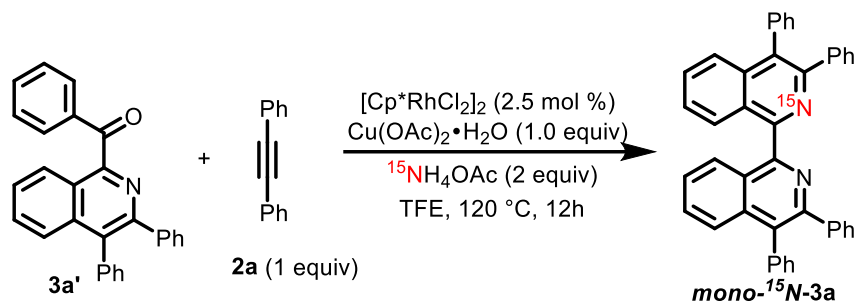

The mixture of **3a'** (38.5 mg, 0.1 mmol), **2a** (17.8 mg, 0.1 mmol, 1 equiv),  $[\text{Cp}^*\text{RhCl}_2]_2$  (1.6 mg, 2.5 mol %),  $\text{Cu}(\text{OAc})_2 \cdot \text{H}_2\text{O}$  (20 mg, 0.1 mmol, 1 equiv),  $^{15}\text{NH}_4\text{OAc}$  (15.4 mg, 0.2 mmol, 2 equiv) and TFE (2 mL) was reacted at 120 °C for 12 h under air. The reaction mixture was purified by a neutral aluminum oxide (200–300 mesh) column, eluting with petroleum ether/EtOAc (80/1 → 40/1, v/v) to afford **mono-<sup>15</sup>N-3a** as a white solid (50.2 mg, 90% yield). The <sup>15</sup>N ratio was determined by HRMS analysis using Vanquish-Exactive Plus liquid chromatography mass spectrometry (ion trap). HRMS analysis showed that the abundance of <sup>15</sup>N in **3a** was 100%.

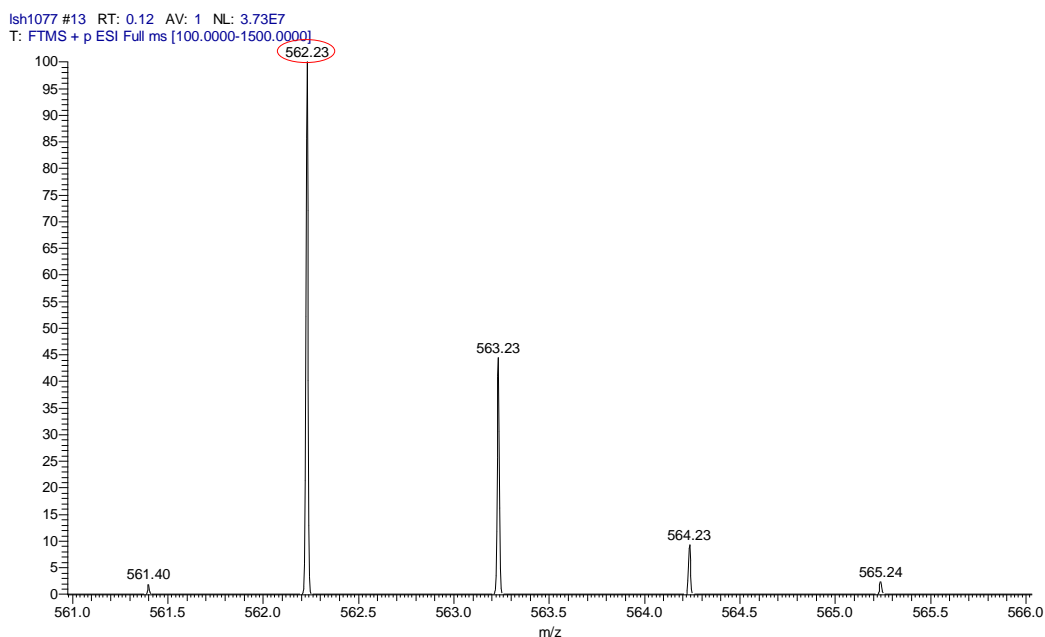

Figure S15 ESI-MS of **mono-<sup>15</sup>N-3a**

## 6.7 Adjusting the $^{15}\text{N}$ incorporation of mix- $^{15}\text{N}$ -3a by reaction acidity

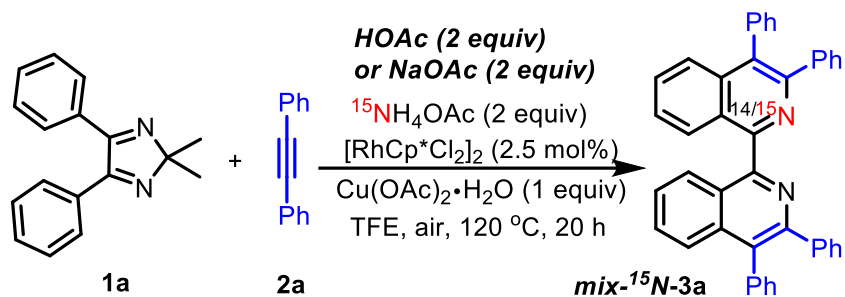

**With acid HOAc:** The mixture of **1** (0.1 mmol), **2** (0.2 mmol, 2 equiv),  $[(\text{Cp}^*\text{RhCl}_2)_2]$  (1.6 mg, 2.5 mol %),  $\text{Cu}(\text{OAc})_2 \cdot \text{H}_2\text{O}$  (20 mg, 0.1 mmol, 1 equiv),  $^{15}\text{NH}_4\text{OAc}$  (15.4 mg, 0.2 mmol, 2 equiv), HOAc (11  $\mu\text{L}$ , 0.2 mmol, 2 equiv), and TFE (2 mL) was reacted at 120 °C for 12 h under air. The reaction mixture was analyzed by HRMS analysis using Vanquish-Exactive Plus liquid chromatography mass spectrometry (ion trap) without any purification. HRMS analysis showed that the abundance of  $^{15}\text{N}$  in **3a** was 58%.

**With base NaOAc:** The mixture of **1** (0.1 mmol), **2** (0.2 mmol, 2 equiv),  $[(\text{Cp}^*\text{RhCl}_2)_2]$  (1.6 mg, 2.5 mol %),  $\text{Cu}(\text{OAc})_2 \cdot \text{H}_2\text{O}$  (20 mg, 0.1 mmol, 1 equiv),  $^{15}\text{NH}_4\text{OAc}$  (15.4 mg, 0.2 mmol, 2 equiv), NaOAc (16.4 mg, 0.2 mmol, 2 equiv), and TFE (2 mL) was reacted at 120 °C for 12 h under air. The reaction mixture was analyzed by HRMS analysis using Vanquish-Exactive Plus liquid chromatography mass spectrometry (ion trap) without any purification. HRMS analysis showed that the abundance of  $^{15}\text{N}$  in **3a** was 27%.

YYY-667 #19 RT: 0.18 AV: 1 NL: 9.35E7  
T: FTMS + p ESI Full ms [100.0000-1500.0000]

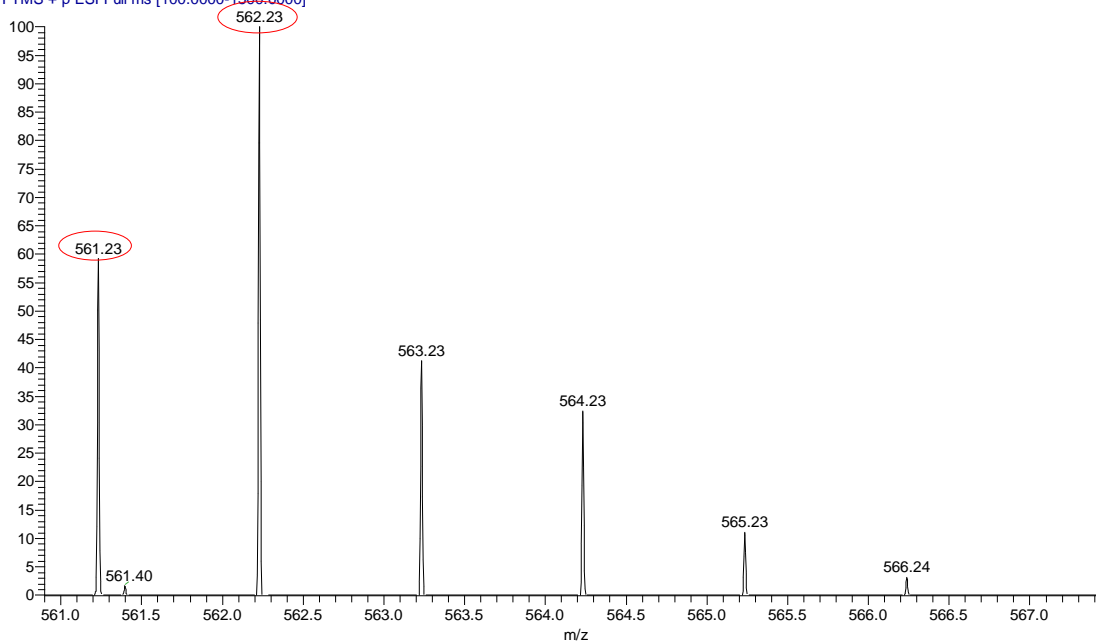

*Figure S16 ESI-MS of mix-<sup>15</sup>N-3a in the presence of HOAc*

YYY-670 #15 RT: 0.14 AV: 1 NL: 2.37E8  
T: FTMS + p ESI Full ms [100.0000-1500.0000]

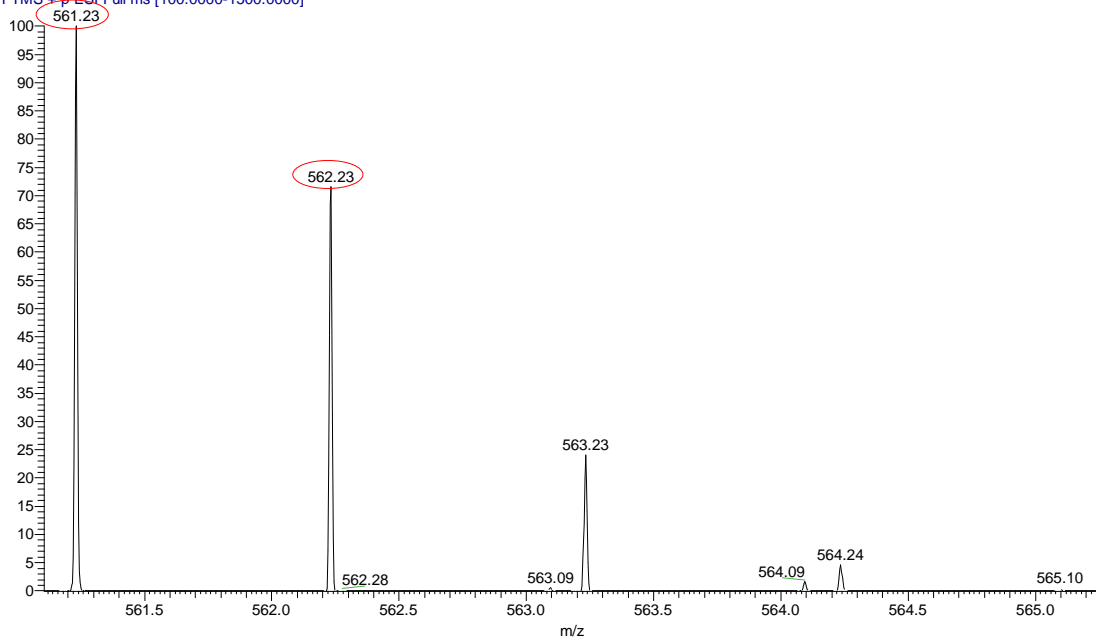

*Figure S17 ESI-MS of mix-<sup>15</sup>N-3a in the presence of NaOAc*

## 7 Using 1,1'-BIQ as ligand in double *N*-arylation to synthesize benzo[*c*]cinnolines

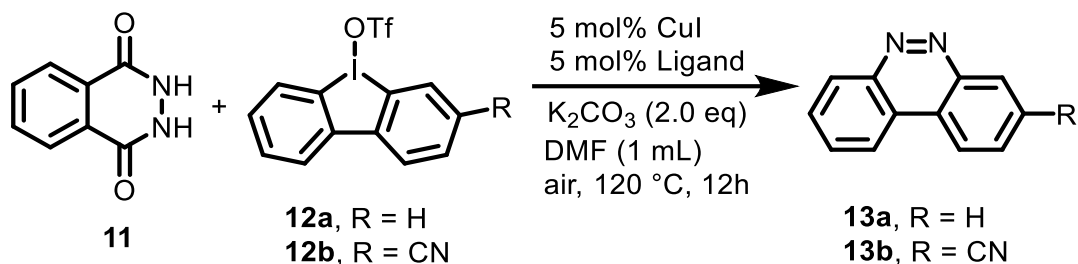

The mixture of phthalhydrazide **11** (32.4 mg, 0.2 mmol), **12** (0.25 mmol, 1.25 equiv), CuI (2 mg, 5 mol%), ligand (5 mol%), K<sub>2</sub>CO<sub>3</sub> (55.2 mg, 0.4 mmol, 2 equiv) and DMF (1 mL) was stirred at 120 °C for 12 h under air. The reaction mixture was concentrated under vacuum and the residue was purified by a silica gel (100–200 mesh) column, eluting with petroleum ether/EtOAc (10/1 → 5/1, v/v) to afford **13a** or **13b**.

**Table S9.** Reaction data of **10** and **11**

| Entry | Iodonium   | Ligand    | Yield (%) <sup>b</sup> |
|-------|------------|-----------|------------------------|
| 1     | <b>12a</b> | none      | 67 ( <b>13a</b> )      |
| 2     | <b>12a</b> | 2,2'-Bipy | 90 ( <b>13a</b> )      |
| 3     | <b>12a</b> | 1,10-Phen | 90 ( <b>13a</b> )      |
| 4     | <b>12a</b> | DMEDA     | 90 ( <b>13a</b> )      |
| 5     | <b>12a</b> | <b>3a</b> | 95 ( <b>13a</b> )      |
| 6     | <b>12b</b> | 2,2'-Bipy | 35 ( <b>13b</b> )      |
| 7     | <b>12b</b> | <b>3a</b> | 95 ( <b>13b</b> )      |
| 8     | <b>12b</b> | <b>3e</b> | 80 ( <b>13b</b> )      |
| 9     | <b>12b</b> | <b>3j</b> | 82 ( <b>13b</b> )      |
| 10    | <b>12b</b> | <b>3m</b> | 78 ( <b>13b</b> )      |
| 11    | <b>12b</b> | <b>3o</b> | 89 ( <b>13b</b> )      |

## 8 Experimental data for the described substances

### 3,3',4,4'-tetraphenyl-1,1'-biisoquinoline (3a)

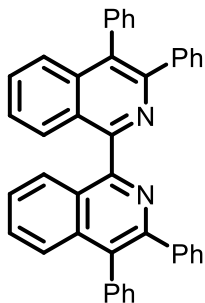

White solid (From GP B: 52.1 mg, 93% yield; From GP C, 29.0 mg, 52% yield), purification via a neutral aluminum oxide (200–300 mesh) column (petroleum ether/EtOAc = 80/1→40/1, v/v). **<sup>1</sup>H NMR (500MHz, CDCl<sub>3</sub>):**  $\delta$  = 8.09 (d,  $J$  = 8.5 Hz, 2H), 7.78 (d,  $J$  = 8.5 Hz, 2H), 7.63 (t,  $J$  = 7.5 Hz, 2H), 7.54 (t,  $J$  = 7.8 Hz, 2H), 7.44–7.35 (m, 14H), 7.20–7.14 (m, 6H) ppm. The NMR data are consistent with the literature.<sup>9</sup>

### 6,6'-dimethyl-3,3',4,4'-tetraphenyl-1,1'-biisoquinoline (3b)

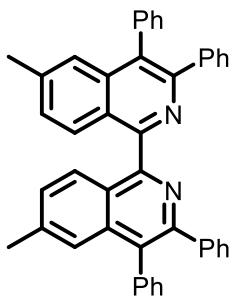

White solid (37.7 mg, 64% yield), purification via a neutral aluminum oxide (200–300 mesh) column (petroleum ether/EtOAc = 80/1→60/1, v/v). **<sup>1</sup>H NMR (500MHz, CDCl<sub>3</sub>):**  $\delta$  = 7.97 (d,  $J$  = 8.5 Hz, 2H), 7.51 (s, 2H), 7.43–7.33 (m, 16H), 7.18–7.12 (m, 6H), 2.45 (s, 6H) ppm. The NMR data are consistent with the literature.<sup>9</sup>



**6,6'-dichloro-3,3',4,4'-tetraphenyl-1,1'-biisoquinoline (3c)**

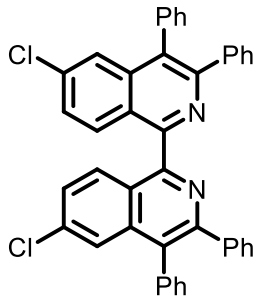

White solid (From GP B: 48.5 mg, 77% yield; From GP C, 30.4 mg, 48% yield), purification via a neutral aluminum oxide (200–300 mesh) column (petroleum ether/EtOAc = 80/1→40/1, v/v). **<sup>1</sup>H NMR (500MHz, CDCl<sub>3</sub>):**  $\delta$  = 8.09 (d,  $J$  = 8.0 Hz, 2H), 7.75 (s, 2H), 7.49 (d,  $J$  = 9.0 Hz, 2H), 7.46–7.38 (m, 10H), 7.32 (d,  $J$  = 7.0 Hz, 4H), 7.21–7.15 (m, 6H) ppm. The NMR data are consistent with the literature.<sup>9</sup>

**6,6'-difluoro-3,3',4,4'-tetraphenyl-1,1'-biisoquinoline (3d)**

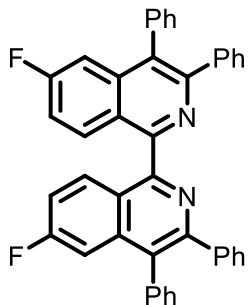

White solid (34.4 mg, 58% yield), purification via a neutral aluminum oxide (200–300 mesh) column (petroleum ether/EtOAc = 80/1→40/1, v/v). **<sup>1</sup>H NMR (500MHz, CDCl<sub>3</sub>):**  $\delta$  = 8.19–8.16 (m, 2H), 7.45–7.39 (m, 12H), 7.32–7.30 (m, 6H), 7.19–7.15 (m, 6H) ppm. The NMR data are consistent with the literature.<sup>9</sup>

**7,7'-dimethyl-3,3',4,4'-tetraphenyl-1,1'-biisoquinoline (3e)**

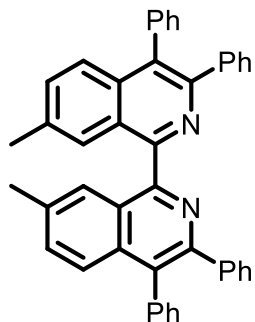

White solid (47.2 mg, 80% yield), purification via a neutral aluminum oxide (200–300 mesh) column (petroleum ether/EtOAc = 80/1→40/1, v/v).  $^1\text{H NMR}$  (500MHz,  $\text{CDCl}_3$ ):  $\delta$  = 7.83 (s, 2H), 7.68 (d,  $J$  = 8.5 Hz, 2H), 7.48–7.46 (m, 2H), 7.44–7.35 (m, 14H), 7.20–7.13 (m, 6H), 2.47 (s, 6H) ppm. The NMR data are consistent with the literature.<sup>9</sup>

**4,4',5,5'-tetraphenyl-3a,7a-dihydro-7,7'-bithieno[2,3-*c*]pyridine (3f)**

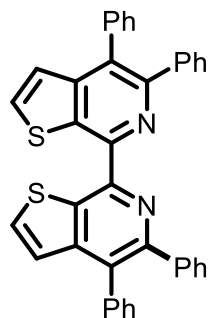

White solid (22.4 mg, 39% yield), purification via a neutral aluminum oxide (200–300 mesh) column (petroleum ether/EtOAc = 80/1→20/1, v/v). M.p.: >250 °C.  $^1\text{H NMR}$  (500MHz,  $\text{CDCl}_3$ ):  $\delta$  = 7.78 (d,  $J$  = 5.5 Hz, 2H), 7.67 (d,  $J$  = 7.0 Hz, 4H), 7.41–7.29 (m, 18H) ppm.  $^{13}\text{C NMR}$  (125 MHz,  $\text{CDCl}_3$ ):  $\delta$  = 147.7, 139.9, 138.3, 136.4, 135.3, 131.0, 130.8, 128.4, 127.9, 127.8, 127.6, 127.4, 127.2, 125.4, 122.7 ppm. HRMS (ESI)  $m/z$ : calcd for  $\text{C}_{38}\text{H}_{25}\text{N}_2\text{S}_2$  ( $[\text{M}+\text{H}]^+$ ) 573.1459, found 573.1458.

### 6-ethoxy-6'-methyl-3,3',4,4'-tetraphenyl-1,1'-biisoquinoline (3g)

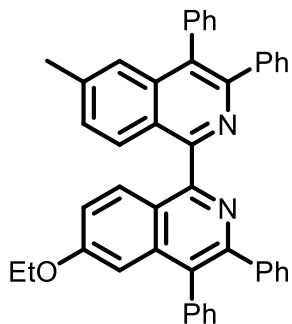

White solid (From GP B: 46.4 mg, 75% yield; From GP C, 36.6 mg, 59% yield), purification via a neutral aluminum oxide (200–300 mesh) column (petroleum ether/EtOAc = 80/1→40/1, v/v). **<sup>1</sup>H NMR (500MHz, CDCl<sub>3</sub>):**  $\delta$  = 8.00–7.97 (m, 2H), 7.52 (s, 1H), 7.42–7.35 (m, 15H), 7.17–7.14 (m, 7H), 7.00 (s, 1H), 3.96 (q,  $J$  = 7.0 Hz, 2H), 2.45 (s, 3H), 1.39 (t,  $J$  = 7.0 Hz, 3H) ppm. The NMR data are consistent with the literature.<sup>9</sup>

### 3,3',4,4'-tetrakis(2-methoxyphenyl)-1,1'-biisoquinoline (3h)

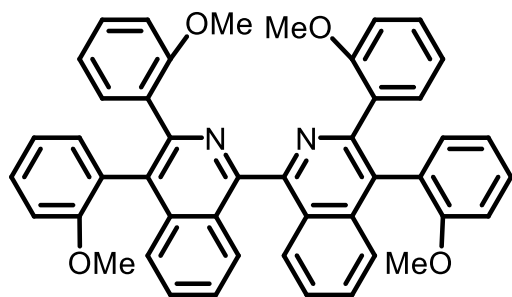

White solid (37.6 mg, 69% yield), purification via a neutral aluminum oxide (200–300 mesh) column (petroleum ether/EtOAc = 10/1→2/1, v/v). **<sup>1</sup>H NMR (500MHz, CDCl<sub>3</sub>):**  $\delta$  = 8.33 (s, 2H), 7.58–7.56 (m, 4H), 7.52–7.50 (m, 2H), 7.29–7.26 (m, 2H), 7.19–7.11 (m, 6H), 6.91–6.86 (m, 4H), 6.75 (s, 4H), 3.71 (s, 6H), 3.60 (s, 6H) ppm. The NMR data are consistent with the literature.<sup>9</sup>

### 3,3',4,4'-tetrakis(3-bromophenyl)-1,1'-biisoquinoline (3i)

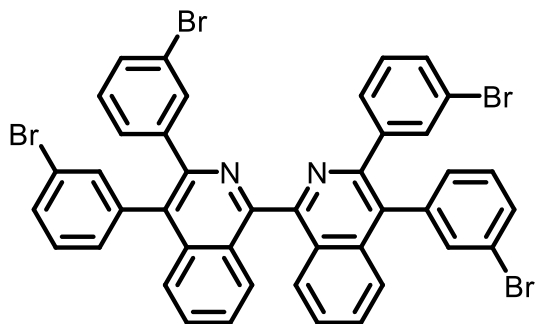

White solid (43.6 mg, 50% yield), purification via a neutral aluminum oxide (200–300 mesh) column (petroleum ether/EtOAc = 80/1→20/1, v/v). M.p.: >250 °C. **<sup>1</sup>H NMR (500MHz, CDCl<sub>3</sub>):**  $\delta$  = 7.98 (d,  $J$  = 8.5 Hz, 2H), 7.76–7.67 (m, 6H), 7.59–7.54 (m, 6H), 7.34–7.31 (m, 4H), 7.26–7.24 (m, 4H), 7.05 (t,  $J$  = 8.0 Hz, 2H) ppm. **<sup>13</sup>C NMR (125 MHz, CDCl<sub>3</sub>):**  $\delta$  = 157.9, 148.2, 142.3, 139.2, 136.9, 134.1, 133.5, 131.2, 131.1, 130.6, 130.3, 130.2, 130.1, 129.4, 129.1, 127.8, 127.5, 127.0, 125.9, 122.7, 122.2 ppm. The NMR data are consistent with the literature.<sup>10</sup>

### 3,3',4,4'-tetrakis(4-methoxyphenyl)-1,1'-biisoquinoline (3j)

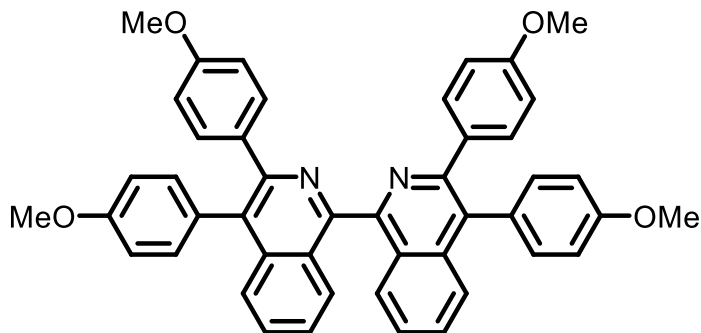

White solid (From GP B: 34.4 mg, 51% yield; From GP C, 31.6 mg, 46% yield), purification via a neutral aluminum oxide (200–300 mesh) column (petroleum ether/EtOAc = 20/1→8/1, v/v). **<sup>1</sup>H NMR (500MHz, CDCl<sub>3</sub>):**  $\delta$  = 8.04 (d,  $J$  = 8.0 Hz, 2H), 7.77 (d,  $J$  = 8.5 Hz, 2H), 7.60 (t,  $J$  = 7.3 Hz, 2H), 7.48 (t,  $J$  = 7.3 Hz, 2H), 7.38 (d,  $J$  = 8.0 Hz, 4H), 7.26–7.25 (m, 4H), 6.98 (d,  $J$  = 8.5 Hz, 4H), 6.72 (d,  $J$  = 8.5 Hz, 4H), 3.89 (s, 6H), 3.74 (s, 6H) ppm. The NMR data are consistent with the literature.<sup>9</sup>

### 3,3',4,4'-tetrakis(4-chlorophenyl)-1,1'-biisoquinoline (3k)

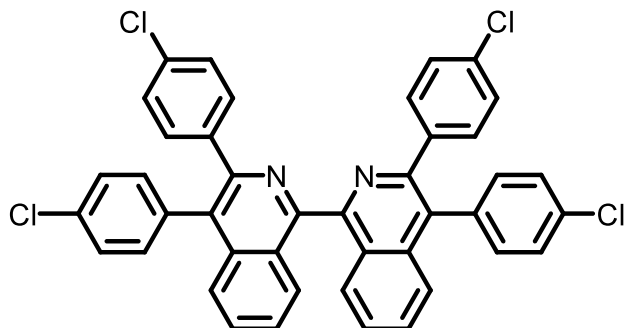

White solid (49.2 mg, 70% yield), purification via a neutral aluminum oxide (200–300 mesh) column (petroleum ether/EtOAc = 100/1→40/1, v/v).  $^1\text{H NMR}$  (500MHz,  $\text{CDCl}_3$ ):  $\delta$  = 8.01 (d,  $J$  = 8.5 Hz, 2H), 7.73 (d,  $J$  = 8.5 Hz, 2H), 7.67 (t,  $J$  = 7.5 Hz, 2H), 7.55 (t,  $J$  = 7.0 Hz, 2H), 7.43 (d,  $J$  = 8.5 Hz, 4H), 7.33 (d,  $J$  = 8.5 Hz, 4H), 7.28–7.26 (m, 4H), 7.18 (d,  $J$  = 8.5 Hz, 4H) ppm. The NMR data are consistent with the literature.<sup>9</sup>

### 3,3',4,4'-tetrakis(4-bromophenyl)-1,1'-biisoquinoline (3l)

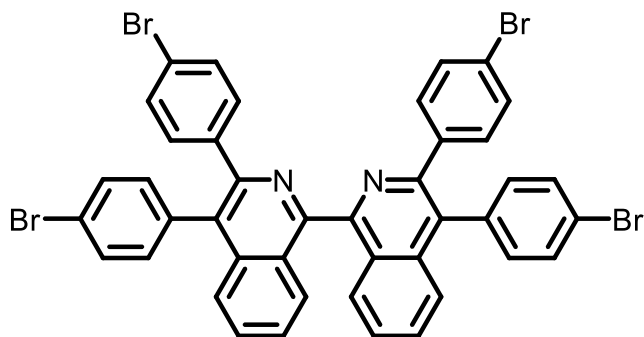

White solid (73.3 mg, 84% yield), purification via a neutral aluminum oxide (200–300 mesh) column (petroleum ether/EtOAc = 100/1→40/1, v/v).  $^1\text{H NMR}$  (500MHz,  $\text{CDCl}_3$ ):  $\delta$  = 8.00 (d,  $J$  = 8.5 Hz, 2H), 7.73 (d,  $J$  = 8.5 Hz, 2H), 7.66 (t,  $J$  = 7.8 Hz, 2H), 7.60–7.53 (m, 6H), 7.34 (d,  $J$  = 7.0 Hz, 4H), 7.27 (d,  $J$  = 9.0 Hz, 4H, cover the solvent), 7.21 (d,  $J$  = 6.5 Hz, 4H) ppm. The NMR data are consistent with the literature.<sup>9</sup>

### 3,3',4,4'-tetrakis(4-(trifluoromethyl)phenyl)-1,1'-biisoquinoline (3m)

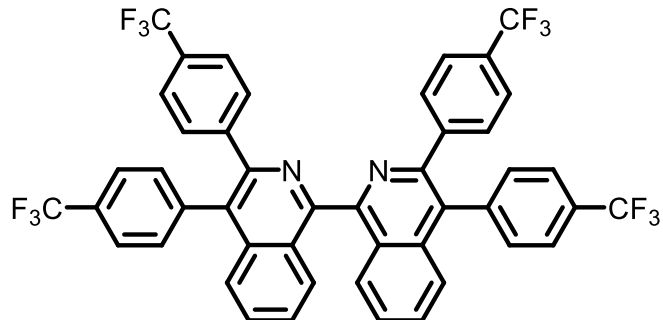

White solid (From GP B: 68.4 mg, 82% yield; From GP C, 43.3 mg, 52% yield), purification via a neutral aluminum oxide (200–300 mesh) column (petroleum ether/EtOAc = 100/1→40/1, v/v). **<sup>1</sup>H NMR (500MHz, CDCl<sub>3</sub>):**  $\delta$  = 8.07 (d,  $J$  = 8.0 Hz, 2H), 7.75–7.70 (m, 8H), 7.62 (t,  $J$  = 6.0 Hz, 2H), 7.52–7.46 (m, 12H) ppm. The NMR data are consistent with the literature.<sup>10</sup>

### 3,3',4,4'-tetra(thiophen-2-yl)-1,1'-biisoquinoline (3n)

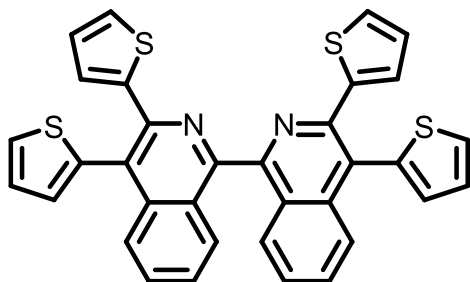

White solid (26.4 mg, 45% yield), purification via a neutral aluminum oxide (200–300 mesh) column (petroleum ether/EtOAc = 80/1→40/1, v/v). **<sup>1</sup>H NMR (500MHz, CDCl<sub>3</sub>):**  $\delta$  = 8.28 (d,  $J$  = 8.5 Hz, 2H), 7.75 (d,  $J$  = 8.5 Hz, 2H), 7.69–7.64 (m, 4H), 7.51 (t,  $J$  = 7.5 Hz, 2H), 7.35 (t,  $J$  = 3.8 Hz, 2H), 7.28–7.27 (m, 2H), 7.25–7.24 (m, 2H), 6.91 (t,  $J$  = 4.0 Hz, 2H), 6.82 (d,  $J$  = 3.0 Hz, 2H) ppm. The NMR data are consistent with the literature.<sup>10</sup>

### 3,3',4,4'-tetraethyl-1,1'-biisoquinoline (3o)

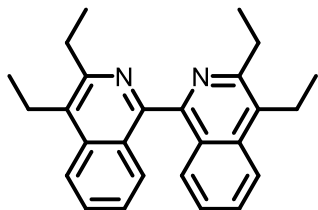

White solid (30.1 mg, 81% yield), purification via a neutral aluminum oxide (200–300 mesh) column (petroleum ether/EtOAc = 60/1→10/1, v/v).  $^1\text{H NMR}$  (500MHz,  $\text{CDCl}_3$ ):  $\delta$  = 8.08 (d,  $J$  = 8.0 Hz, 2H), 7.67–7.63 (m, 4H), 7.33 (t,  $J$  = 8.0 Hz, 2H), 3.20 (q,  $J$  = 7.3 Hz, 4H), 3.10 (q,  $J$  = 7.7 Hz, 4H), 1.39 (t,  $J$  = 6.8 Hz, 12H) ppm. The NMR data are consistent with the literature.<sup>9</sup>

### 4,4'-diethyl-3,3'-diphenyl-1,1'-biisoquinoline (3p)

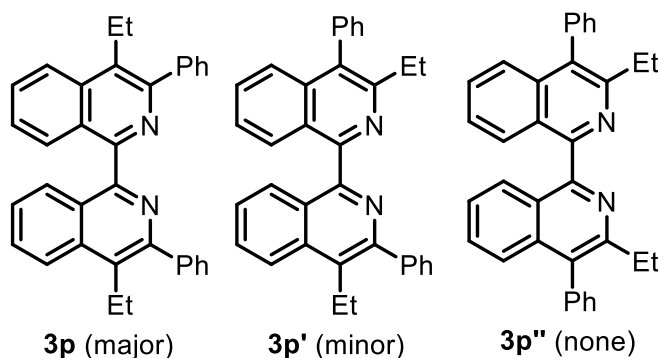

White solid (24.3 mg, 52% yield), purification via a neutral aluminum oxide (200–300 mesh) column (petroleum ether/EtOAc = 60/1→10/1, v/v) afforded the mixture of **3p**, **3p'** and **3p''** (**3p**:**3p'**:**3p''** = 3:1:0).  $^1\text{H NMR}$  (500MHz,  $\text{CDCl}_3$ , major):  $\delta$  = 8.17 (d,  $J$  = 8.5 Hz, 2H), 7.83 (d,  $J$  = 8.5 Hz, 2H), 7.74 (t,  $J$  = 7.5 Hz, 2H), 7.58 (d,  $J$  = 7.0 Hz, 4H), 7.48–7.42 (m, 7H), 7.38–7.35 (m, 3H), 3.14 (q,  $J$  = 7.0 Hz, 4H), 1.34 (t,  $J$  = 7.3 Hz, 6H) ppm. The NMR data are consistent with the literature.<sup>9</sup>

### 3,4-bis(3-bromophenyl)-3',4'-diphenyl-4a,8a-dihydro-1,1'-biisoquinoline (4ai)

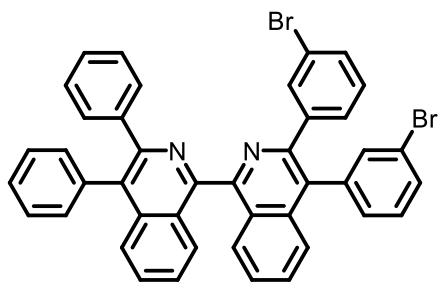

White solid (From GP D: 70.2 mg, 98% yield; From GP E, 25.1 mg, 35% yield), purification via a neutral aluminum oxide (200–300 mesh) column (petroleum ether/EtOAc = 80/1→20/1, v/v). M.p.: >250 °C. **<sup>1</sup>H NMR (500MHz, CDCl<sub>3</sub>):**  $\delta$  = 8.10 (d,  $J$  = 8.0 Hz, 1H), 8.01 (d,  $J$  = 8.0 Hz, 1H), 7.80 (d,  $J$  = 8.5 Hz, 1H), 7.74 (d,  $J$  = 8.5 Hz, 1H), 7.71–7.63 (m, 3H), 7.60–7.53 (m, 4H), 7.44–7.40 (m, 5H), 7.36 (d,  $J$  = 6.5 Hz, 2H), 7.32 (t,  $J$  = 7.8 Hz, 2H), 7.27–7.25 (m, 2H, cover the solvent), 7.21–7.16 (m, 3H), 7.06 (t,  $J$  = 7.8 Hz, 1H) ppm. **<sup>13</sup>C NMR (125 MHz, CDCl<sub>3</sub>):**  $\delta$  = 158.3, 157.1, 149.8, 148.2, 142.4, 140.8, 139.3, 137.4, 137.3, 136.9, 134.1, 133.5, 131.4, 131.1, 131.0, 130.6, 130.5, 130.5, 130.3, 130.1, 130.0, 129.3, 129.1, 128.5, 127.8, 127.7, 127.6, 127.6, 127.2, 127.2, 127.1, 126.8, 126.3, 125.8, 122.7, 122.2 ppm. **HRMS (ESI)  $m/z$ :** calcd for C<sub>42</sub>H<sub>27</sub>Br<sub>2</sub>N<sub>2</sub> ([M+H]<sup>+</sup>) 717.0541, found 717.0540.

### 3,4-bis(4-methoxyphenyl)-3',4'-diphenyl-4a,8a-dihydro-1,1'-biisoquinoline (4aj)

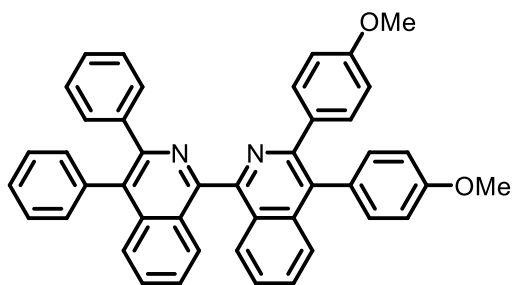

White solid (From GP D: 58.0 mg, 93% yield; From GP E, 24.6 mg, 40% yield), purification via a neutral aluminum oxide (200–300 mesh) column (petroleum ether/EtOAc = 20/1→2/1, v/v). **<sup>1</sup>H NMR (500MHz, CDCl<sub>3</sub>):**  $\delta$  = 8.09–8.04 (m, 2H), 7.77 (t,  $J$  = 7.8 Hz, 2H), 7.64–7.59 (m, 2H), 7.53–7.48 (m, 2H), 7.42–7.34 (m, 9H), 7.26–7.24 (m, 2H), 7.19–7.13 (m, 3H), 6.98 (d,  $J$  = 7.5 Hz,



2H), 6.73 (d,  $J = 8.0$  Hz, 2H), 3.89 (s, 3H), 3.74 (s, 3H) ppm. The NMR data are consistent with the literature.<sup>9</sup>

### 3,4-bis(4-bromophenyl)-3',4'-diphenyl-4a,8a-dihydro-1,1'-biisoquinoline (4al)

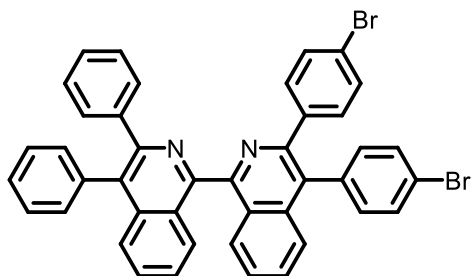

White solid (From GP D: 70.1 mg, 97% yield; From GP E, 32.5 mg, 45% yield), purification via a neutral aluminum oxide (200–300 mesh) column (petroleum ether/EtOAc = 80/1→20/1, v/v). M.p.: 237–239 °C. <sup>1</sup>H NMR (500MHz, CDCl<sub>3</sub>):  $\delta = 8.09$  (d,  $J = 8.0$  Hz, 1H), 8.02 (d,  $J = 8.5$  Hz, 1H), 7.79 (d,  $J = 8.5$  Hz, 1H), 7.72 (d,  $J = 7.5$  Hz, 1H), 7.68–7.51 (m, 6H), 7.43–7.41 (m, 5H), 7.35 (d,  $J = 8.5$  Hz, 4H), 7.30 (d,  $J = 8.5$  Hz, 2H), 7.22 (d,  $J = 8.0$  Hz, 2H), 7.18–7.14 (m, 3H) ppm. <sup>13</sup>C NMR (125 MHz, CDCl<sub>3</sub>):  $\delta = 158.2, 157.2, 149.8, 148.4, 140.8, 139.5, 137.4, 137.3, 137.0, 136.2, 133.01, 132.2, 132.0, 131.4, 131.4, 131.1, 130.9, 130.6, 130.5, 130.0, 128.5, 127.8, 127.8, 127.6, 127.5, 127.3, 127.2$  (2C), 127.0, 126.8, 126.3, 125.8, 122.1, 121.9 ppm. HRMS (ESI)  $m/z$ : calcd for C<sub>42</sub>H<sub>27</sub>Br<sub>2</sub>N<sub>2</sub> ([M+H]<sup>+</sup>) 717.0541, found 717.0545.

### 3,4-diethyl-3',4'-diphenyl-4a,8a-dihydro-1,1'-biisoquinoline (4ao)

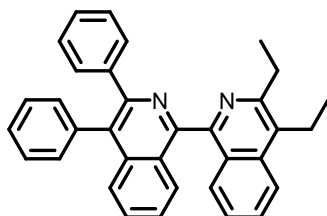

White solid (45.0 mg, 97% yield), purification via a neutral aluminum oxide (200–300 mesh) column (petroleum ether/EtOAc = 80/1→20/1, v/v). M.p.: 164–166 °C. <sup>1</sup>H NMR (500MHz, CDCl<sub>3</sub>):  $\delta = 8.11$  (d,  $J = 8.5$  Hz, 1H), 7.92 (d,  $J = 8.0$  Hz, 1H), 7.79 (d,  $J = 8.5$  Hz, 1H), 7.74 (d,  $J$

= 8.5 Hz, 1H), 7.70 (d,  $J = 7.5$  Hz, 1H), 7.59 (d,  $J = 7.5$  Hz, 1H), 7.45–7.38 (m, 7H), 7.33 (d,  $J = 7.0$  Hz, 2H), 7.17–7.13 (m, 3H), 3.21 (q,  $J = 7.5$  Hz, 2H), 3.11 (q,  $J = 7.5$  Hz, 2H), 1.42–1.39 (m, 6H) ppm.  $^{13}\text{C}$  NMR (125 MHz,  $\text{CDCl}_3$ ):  $\delta = 158.0, 156.0, 149.7, 141.0, 137.7, 137.3, 136.3, 131.5, 130.6, 130.4, 130.0, 129.7, 128.5, 128.1, 127.7, 127.6, 127.5, 127.1, 127.0, 126.9, 126.8, 126.1, 125.9, 123.2, 28.8, 21.2, 15.4, 15.3$  ppm. HRMS (ESI)  $m/z$ : calcd for  $\text{C}_{34}\text{H}_{29}\text{N}_2$  ( $[\text{M}+\text{H}]^+$ ) 465.2331, found 465.2327.

### 1,1'-(propane-2,2-diyl)bis(3,4-diphenylisoquinoline) (5a)

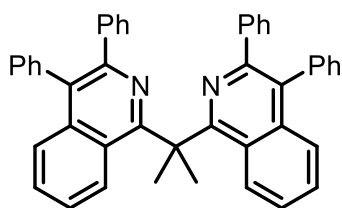

White solid (14.7 mg, 24% yield), purification via filtration. M.p.:  $>250$  °C.  $^1\text{H}$  NMR (500 MHz,  $\text{CDCl}_3$ ):  $\delta = 7.82$  (d,  $J = 8.5$  Hz, 2H), 7.65 (d,  $J = 7.5$  Hz, 4H), 7.56 (d,  $J = 8.5$  Hz, 2H), 7.43–7.36 (m, 6H), 7.32–7.28 (m, 12H), 7.08 (t,  $J = 7.5$  Hz, 2H), 2.31 (s, 6H) ppm.  $^{13}\text{C}$  NMR (125 MHz,  $\text{CDCl}_3$ ):  $\delta = 165.9, 147.9, 141.4, 138.2, 137.5, 131.6, 130.8, 129.5, 129.1, 128.5, 127.7, 127.4, 127.2, 126.6, 126.2, 125.9, 125.5, 52.5, 30.9$  ppm. HRMS (ESI)  $m/z$ : calcd for  $\text{C}_{45}\text{H}_{35}\text{N}_2$  ( $[\text{M}+\text{H}]^+$ ) 603.2800, found 603.2794.

### 1,1'-(propane-2,2-diyl)bis(4-methyl-3-phenylisoquinoline) (5b)

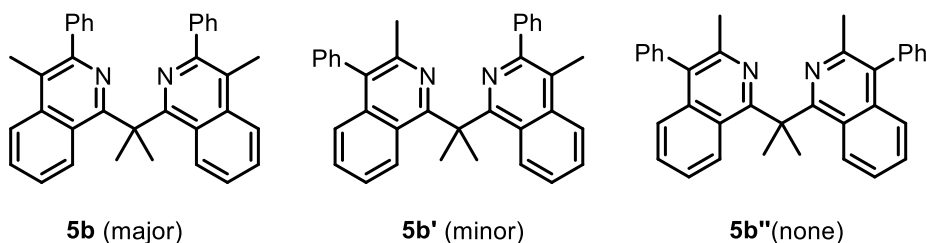

Light brown solid (8 mg, 17% yield), purification via filtration afforded the mixture of **5b**, **5b'** and **5b''** (**5b**: **5b'**: **5b''** = 10:1:0).  $^1\text{H}$  NMR (500 MHz,  $\text{CDCl}_3$ , major):  $\delta = 8.01$  (d,  $J = 9.0$  Hz, 2H),

7.87 (d,  $J = 7.5$  Hz, 4H), 7.70 (d,  $J = 8.5$  Hz, 2H), 7.57 (t,  $J = 7.5$  Hz, 4H), 7.48–7.42 (m, 4H), 7.04 (d,  $J = 7.8$  Hz, 2H), 2.72 (s, 6H), 2.16 (s, 6H) ppm.  $^{13}\text{C}$  NMR (125 MHz,  $\text{CDCl}_3$ , major):  $\delta = 164.4, 149.5, 142.1, 137.7, 130.7, 129.0, 128.1, 127.6, 126.7, 125.5, 125.4, 124.4, 122.5, 51.8, 30.9, 16.1$  ppm. HRMS (ESI)  $m/z$ : calcd for  $\text{C}_{35}\text{H}_{31}\text{N}_2$  ( $[\text{M}+\text{H}]^+$ ) 479.2487, found 479.2483.

### 1,1'-(ethane-1,1-diyl)bis(3,4-diphenylisoquinoline) (5c)

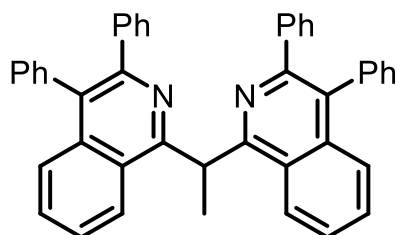

White solid (23.6 mg, 40% yield), purification via a silica (100-200 mesh) gel column (petroleum ether/EtOAc = 80/1→40/1, v/v). M.p.: >250 °C.  $^1\text{H}$  NMR (500MHz,  $\text{CDCl}_3$ ):  $\delta = 8.86$  (d,  $J = 8.0$  Hz, 2H), 7.63-7.61 (m, 2H), 7.48–7.46 (m, 8H), 7.37–7.35(m, 6H), 7.26–7.22(m, 10H, cover the solvent), 6.12 (q,  $J = 7.0$  Hz, 1H), 2.32 (d,  $J = 7.0$  Hz, 3H) ppm.  $^{13}\text{C}$  NMR (125 MHz,  $\text{CDCl}_3$ ):  $\delta = 161.9, 148.7, 141.3, 138.0, 137.2, 131.5$  (2C), 130.6, 129.6, 128.5, 128.4, 127.6, 127.3, 127.1, 126.5, 126.4, 126.3, 48.5, 19.4 ppm. HRMS (ESI)  $m/z$ : calcd for  $\text{C}_{44}\text{H}_{32}\text{N}_2\text{Na}$  ( $[\text{M}+\text{Na}]^+$ ) 611.2463, found 611.2462.

### 1,1'-(ethane-1,1-diyl)bis(3-methyl-4-phenylisoquinoline) (5d)

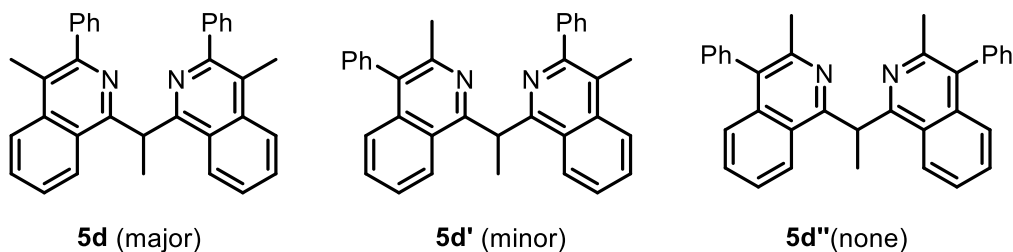

Yellow oil (28.8 mg, 62% yield), purification via a silica (100-200 mesh) gel column (petroleum ether/EtOAc = 80/1→40/1, v/v) afforded the mixture of **5d**, **5d'** and **5d''** (**5d**: **5d'**: **5d''** = 4:1:0).  $^1\text{H}$  NMR (500MHz,  $\text{CDCl}_3$ , major):  $\delta = 8.74$  (d,  $J = 8.5$  Hz, 2H), 7.98 (d,  $J = 7.5$  Hz, 2H), 7.69 (d,  $J$

= 7.5 Hz, 4H), 7.59 (t,  $J = 7.8$  Hz, 2H), 7.53(t,  $J = 7.5$  Hz, 4H), 7.46–7.40 (m, 4H), 5.89 (q,  $J = 7.0$  Hz, 1H), 2.61 (s, 6H), 2.18 (d,  $J = 7.9$  Hz, 3H) ppm.  $^{13}\text{C}$  NMR (125 MHz,  $\text{CDCl}_3$ , major):  $\delta = 160.4, 150.2, 142.0, 137.3, 130.3, 129.5, 128.1, 127.5, 127.2, 126.3, 126.0, 124.3, 122.7, 49.2, 29.9, 19.4$  ppm. HRMS (ESI)  $m/z$ : calcd for  $\text{C}_{34}\text{H}_{29}\text{N}_2$  ( $[\text{M}+\text{H}]^+$ ) 465.2331, found 465.2328.

### 1,1'-(ethane-1,1-diyl)bis(4-ethyl-3-phenylisoquinoline) (5e)

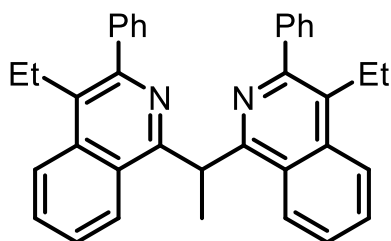

Yellow oil (24.7 mg, 50% yield), purification via a silica (100-200 mesh) gel column (petroleum ether/EtOAc = 80/1→40/1, v/v).  $^1\text{H}$  NMR (500MHz,  $\text{CDCl}_3$ ):  $\delta = 8.84$  (d,  $J = 8.5$  Hz, 2H), 8.02 (d,  $J = 8.5$  Hz, 2H), 7.64 (d,  $J = 7.5$  Hz, 4H), 7.60 (t,  $J = 7.5$  Hz, 2H), 7.54 (t,  $J = 7.5$  Hz, 4H), 7.48–7.41(m, 4H), 5.90 (q,  $J = 7.2$  Hz, 1H), 3.02 (q,  $J = 7.5$  Hz, 4H) 2.18 (d,  $J = 7.0$  Hz, 3H), 1.29 (t,  $J = 7.5$  Hz, 6H) ppm.  $^{13}\text{C}$  NMR (125 MHz,  $\text{CDCl}_3$ ):  $\delta = 160.3, 150.3, 142.4, 136.2, 129.6, 129.4, 129.0, 128.2, 127.7, 127.5, 126.9, 125.9, 124.2, 49.5, 21.9, 19.3, 15.9$  ppm. HRMS (ESI)  $m/z$ : calcd for  $\text{C}_{36}\text{H}_{33}\text{N}_2$  ( $[\text{M}+\text{H}]^+$ ) 493.2644, found 493.2641.

### 3-ethyl-1-(1-(4-ethyl-3-phenylisoquinolin-1-yl)ethyl)-4-phenylisoquinoline (5e')

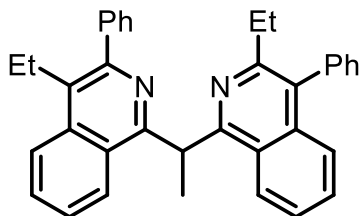

Yellow oil (8 mg, 16% yield), purification via a silica (100-200 mesh) gel column (petroleum ether/EtOAc = 80/1→40/1, v/v).  $^1\text{H}$  NMR (500MHz,  $\text{CDCl}_3$ ):  $\delta = 8.88$  (d,  $J = 8.5$  Hz, 1H), 8.78 (d,  $J = 8.0$  Hz, 1H), 8.02 (d,  $J = 8.5$  Hz, 1H), 7.64 (t,  $J = 7.5$  Hz, 2H), 7.60 (t,  $J = 7.8$  Hz, 1H), 7.54 (t,  $J = 7.5$  Hz, 2H), 7.50–7.40 (m, 6H), 7.38–7.34 (m, 2H), 7.31–7.28 (m, 2H), 5.91 (q,  $J = 7.2$  Hz,

1H), 3.02 (q,  $J = 7.5$  Hz, 2H), 2.77 (q,  $J = 7.5$  Hz, 2H), 2.22 (d,  $J = 7.5$  Hz, 3H), 1.31–1.28 (m, 6H) ppm.  $^{13}\text{C}$  NMR (125 MHz,  $\text{CDCl}_3$ ):  $\delta = 161.6, 160.4, 152.4, 150.3, 142.4, 138.3, 137.0, 136.3, 130.5$  (2C), 129.6, 129.4, 129.2, 129.0, 128.5 (2C), 128.3, 127.8, 127.5, 127.4, 126.9, 126.6, 126.0, 125.8, 125.4, 124.2, 49.4, 31.8, 29.0, 21.9, 19.3, 15.9 ppm. HRMS (ESI)  $m/z$ : calcd for  $\text{C}_{36}\text{H}_{33}\text{N}_2$  ( $[\text{M}+\text{H}]^+$ ) 493.2644, found 493.2639.

### 2,3,3',4,4'-pentaphenyl-4a,8a-dihydro-[1,1'-biisoquinolin]-2-ium triflate (7a)

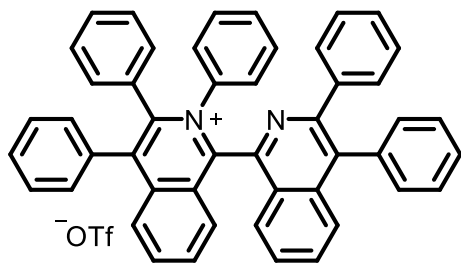

Yellow solid (55.1 mg, 70% yield), purification via a silica (100-200 mesh) gel column ( $\text{CH}_2\text{Cl}_2/\text{CH}_3\text{OH} = 100/1 \rightarrow 60/1$ , v/v). M.p.: 151–153 °C.  $^1\text{H}$  NMR (500 MHz,  $\text{CDCl}_3$ ):  $\delta = 8.49$  (d,  $J = 8.0$  Hz, 1H), 8.04 (t,  $J = 7.3$  Hz, 1H), 7.95 (t,  $J = 7.3$  Hz, 2H), 7.84–7.77 (m, 4H), 7.67–7.59 (m, 3H), 7.45–7.41 (m, 3H), 7.31–7.27 (m, 4H), 7.20 (s, 5H), 7.13 (d,  $J = 7.0$  Hz, 1H), 7.07–7.02 (m, 3H), 6.98 (t,  $J = 7.3$  Hz, 1H), 6.94–6.89 (m, 3H), 6.84–6.79 (m, 2H) ppm.  $^{13}\text{C}$  NMR (125 MHz,  $\text{CDCl}_3$ ):  $\delta = 156.5, 149.9, 149.6, 146.7, 140.5, 140.1, 140.0, 139.9, 137.2, 136.1, 135.9, 133.8, 133.2, 133.1, 132.2, 132.0, 131.9, 131.3, 131.1, 130.9, 130.4, 130.3, 130.1, 129.9, 129.7, 129.2, 129.0, 128.7, 128.5, 128.4, 128.1, 128.0, 127.9, 127.8$ (3C), 127.7, 127.3, 127.2, 127.0, 125.6 ppm.  $^{19}\text{F}$  NMR (470 MHz,  $\text{CDCl}_3$ ):  $\delta = -78.40$  ppm. HRMS (ESI)  $m/z$ : calcd for  $\text{C}_{48}\text{H}_{33}\text{N}_2$  ( $[\text{M}-\text{OTf}^-]^+$ ) 637.2638, found 637.2636.

### 3,4-bis(4-chlorophenyl)-2,3,4'-triphenyl-[1,1'-biisoquinolin]-2-ium triflate (7b)

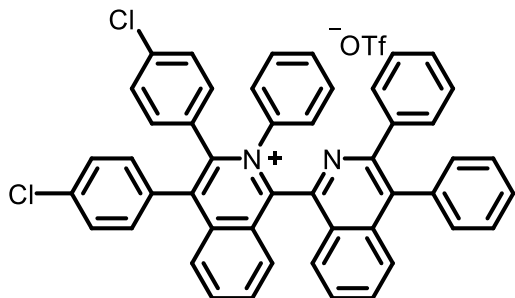

Yellow solid (56.0 mg, 65% yield), purification via a silica (100-200 mesh) gel column ( $\text{CH}_2\text{Cl}_2/\text{CH}_3\text{OH} = 100/1 \rightarrow 60/1$ , v/v). M.p.: 177–179 °C.  **$^1\text{H NMR}$  (500 MHz,  $\text{CDCl}_3$ ):**  $\delta = 8.44$  (d,  $J = 8.5$  Hz, 1H), 8.07 (t,  $J = 7.5$  Hz, 1H), 7.96 (d,  $J = 8.5$  Hz, 1H), 7.90 (d,  $J = 8.5$  Hz, 1H), 7.83–7.77 (m, 4H), 7.64–7.59 (m, 3H), 7.43 (d,  $J = 8.0$  Hz, 2H), 7.40–7.34 (m, 2H), 7.31–7.28 (m, 3H), 7.19 (br s, 5H) 7.07–7.06 (m, 3H), 7.00–6.94 (m, 2H), 6.83 (d,  $J = 8.0$  Hz, 2H) ppm.  **$^{13}\text{C NMR}$  (125 MHz,  $\text{CDCl}_3$ ):**  $\delta = 157.3, 149.9, 149.3, 145.5, 140.0, 139.8, 139.5, 137.6, 136.0, 135.9, 135.6, 135.2, 134.4, 133.5, 133.3, 132.3, 132.0, 131.6, 131.5, 131.1, 130.9, 130.6, 130.2, 130.1, 130.0, 129.9, 129.8, 129.2, 129.0, 128.7, 128.4, 128.3, 128.1$  (2C), 127.9, 127.8, 127.6, 127.5, 127.4, 127.3, 125.7 ppm.  **$^{19}\text{F NMR}$  (470 MHz,  $\text{CDCl}_3$ ):**  $\delta = -78.46$  ppm. **HRMS (ESI)  $m/z$ :** calcd for  $\text{C}_{48}\text{H}_{31}\text{Cl}_2\text{N}_2$  ( $[\text{M}-\text{OTf}]^+$ ) 705.1859, found 705.1856.

### 3,4-diethyl-2,3',4'-triphenyl-[1,1'-biisoquinolin]-2-ium (7c)

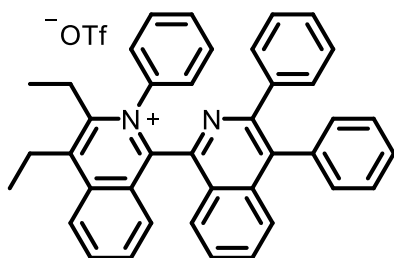

Yellow solid (42.2 mg, 61% yield), purification via a silica (100-200 mesh) gel column ( $\text{CH}_2\text{Cl}_2/\text{CH}_3\text{OH} = 100/1 \rightarrow 60/1$ , v/v). M.p.: 110–112 °C.  **$^1\text{H NMR}$  (500 MHz,  $\text{CDCl}_3$ ):**  $\delta = 8.45$  (d,  $J = 9.0$  Hz, 1H), 8.14 (t,  $J = 7.5$  Hz, 1H), 8.02 (t,  $J = 7.0$  Hz, 1H), 7.77 (t,  $J = 7.3$  Hz, 1H), 7.71 (t,  $J = 7.5$  Hz, 2H), 7.64–7.57 (m, 3H), 7.47–7.41 (m, 2H), 7.36–7.33 (m, 3H), 7.29 (t,  $J = 7.5$  Hz, 1H), 7.25–7.24 (m, 1H), 7.19 (s, 5H), 7.08 (t,  $J = 7.5$  Hz, 1H), 6.85 (d,  $J = 7.0$  Hz, 1H), 3.57–3.50 (m, 1H), 3.47–3.40 (m, 1H), 3.23–3.15 (m, 1H), 3.00–2.93 (m, 1H), 1.60 (t,  $J = 7.5$  Hz, 3H), 1.23

(t,  $J = 7.8$  Hz, 3H) ppm.  $^{13}\text{C}$  NMR (125 MHz,  $\text{CDCl}_3$ ):  $\delta = 155.4, 149.8, 148.7, 140.0, 139.8, 139.3, 139.1, 136.9, 136.1, 135.8, 132.9, 132.1, 131.1, 130.9, 130.7, 130.6, 129.9, 129.8, 129.7, 128.7, 128.4, 128.0, 128.0, 127.9, 127.7, 127.7, 127.1, 127.0, 125.7, 124.8, 24.7, 22.6, 14.9, 13.9$  ppm.  $^{19}\text{F}$  NMR (470 MHz,  $\text{CDCl}_3$ ):  $\delta = -78.42$  ppm. HRMS (ESI)  $m/z$ : calcd for  $\text{C}_{40}\text{H}_{33}\text{N}_2$  ( $[\text{M}-\text{OTf}]^+$ ) 541.2638, found 541.2637.

### 3',4'-diphenyl-[1,1'-biisoquinoline]-3-carbaldehyde (8)

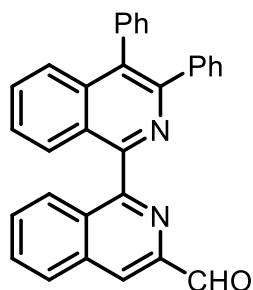

Yellowish solid (20.1 mg, 46% yield), purification via a silica (100-200 mesh) gel column (petroleum ether/EtOAc = 20/1→10/1, v/v). M.p.: > 250 °C.  $^1\text{H}$  NMR (500MHz,  $\text{CDCl}_3$ ):  $\delta = 10.35$  (s, 1H), 8.57 (s, 1H), 8.16 (d,  $J = 8.5$  Hz, 1H), 8.06 (d,  $J = 8.5$  Hz, 1H), 7.84 (t,  $J = 7.5$  Hz, 1H), 7.80 (d,  $J = 8.5$  Hz, 1H), 7.76 (d,  $J = 8.5$  Hz, 1H), 7.72 (t,  $J = 7.8$  Hz, 1H), 7.64 (t,  $J = 8.0$  Hz, 1H), 7.48 (t,  $J = 7.5$  Hz, 1H), 7.43–7.40 (m, 5H), 7.35 (d,  $J = 6.0$  Hz, 2H), 7.19–7.16 (m, 3H) ppm.  $^{13}\text{C}$  NMR (125 MHz,  $\text{CDCl}_3$ ):  $\delta = 193.8, 159.4, 156.4, 150.0, 146.0, 140.6, 137.3, 136.7, 131.7, 131.5, 131.4, 130.7, 130.5, 130.4, 129.3, 128.6, 128.0, 127.8, 127.7, 127.4, 127.3, 126.9, 126.6, 126.4, 121.6$  ppm. HRMS (ESI)  $m/z$ : calcd for  $\text{C}_{31}\text{H}_{21}\text{N}_2\text{O}$  ( $[\text{M}+\text{H}]^+$ ) 437.1649, found 437.1646.

## 9 References

- [1] Du, Y.; Hyster, T. K.; Rovis, T. Rhodium(III)-Catalyzed Oxidative Carbonylation of Benzamides with Carbon Monoxide. *Chem. Commun.* **2011**, 47, 12074–12076.
- [2] (a) Villar, J. M.; Suárez, J.; Varela, J. A.; Saá, C. N-Doped Cationic PAHs by Rh(III)-Catalyzed Double C–H Activation and Annulation of 2-Arylbenzimidazoles with Alkynes. *Org. Lett.* **2017**, 19, 1702–1705. (b) Park, K.; Bae, G.; Moon, J.; Choe, J.; Song, K. H.; Lee, S. Synthesis of

Symmetrical and Unsymmetrical Diarylalkynes from Propiolic Acid Using Palladium-Catalyzed Decarboxylative Coupling. *J. Org. Chem.* **2010**, *75*, 6244–6251.

[3] Zhang, Q.; Zhao, C.; Zhang, X.; He, C. Pang, S. Oxidation of *o*-dioxime by (diacetoxyiodo)benzene: green and mild access to furoxans. *New J. Chem.*, **2022**, *46*, 1489–1493.

[4] Delpivo, C.; Micheletti, G.; Boga, C. A Green Synthesis of Quinoxalines and 2,3-Dihydropyrazines. *Synthesis* **2013**; *45(11)*, 1546–1552.

[5] Liu, Z.; Zhu, D.; Luo, B.; Zhang, N.; Liu, Q.; Hu, Y.; Pi, R.; Huang, P.; Wen, S. Mild Cu(I)-catalyzed cascade reaction of cyclic diaryliodoniums, sodium azide, and alkynes: Efficient synthesis of triazolophenanthridines, *Org. Lett.*, **2014**, *16*, 5600–5603.

[6] Wu, X.-L.; Dong, L. Synthesis of  $\alpha$ -Ketone-isoquinoline Derivatives via Tandem Ruthenium(II)-Catalyzed C–H Activation and Annulation. *Org. Lett.* **2018**, *20*, 6990–6993.

[7] Zhang, X.-Y.; Weng, W.-Z.; Liang, H.; Yang, H.; Zhang, B. Visible-Light-Initiated, Photocatalyst-Free Decarboxylative Coupling of Carboxylic Acids with N-Heterocycles. *Org. Lett.* **2018**, *20*, *15*, 4686–4690.

[8] Bsharat, O.; Doyle, M. G. J.; Munch, M.; Mair, B. A.; Cooze, C. J. C.; Derdau, V.; Bauer, A.; Kong, D.; Rotstein, B. H.; Lundgre, R. J. Aldehyde-catalysed carboxylate exchange in  $\alpha$ -amino acids with isotopically labelled CO<sub>2</sub>. *Nat. Chem.* **2022**, *14*, 1367–1374.

[9] Li, S.; Lv, H.; Xie, R.; Yu, Y.; Ye, X.; Kong, X. The C–H Activation/Bidirecting Group Strategy for Selective Direct Synthesis of Diverse 1,1'-Biisoquinolines. *Org. Lett.* **2020**, *22*, 4207–4212.

[10] Lv, S.; Tian, Y.-N.; Yang, Y.; Wen, C.; Li, S. Rh(III)-Catalyzed One-Pot Three-Component Diannulation of Benzils, Ammonium Acetate, and Alkynes to Build 1,1'-Biisoquinolines. *J. Org. Chem.* **2022**, *87*, 16019–16025.



# 10 Copies of $^1\text{H}$ and $^{13}\text{C}$ and $^{19}\text{F}$ spectra

## $^1\text{H}$ NMR (500 MHz, $\text{CDCl}_3$ ) of **1a**

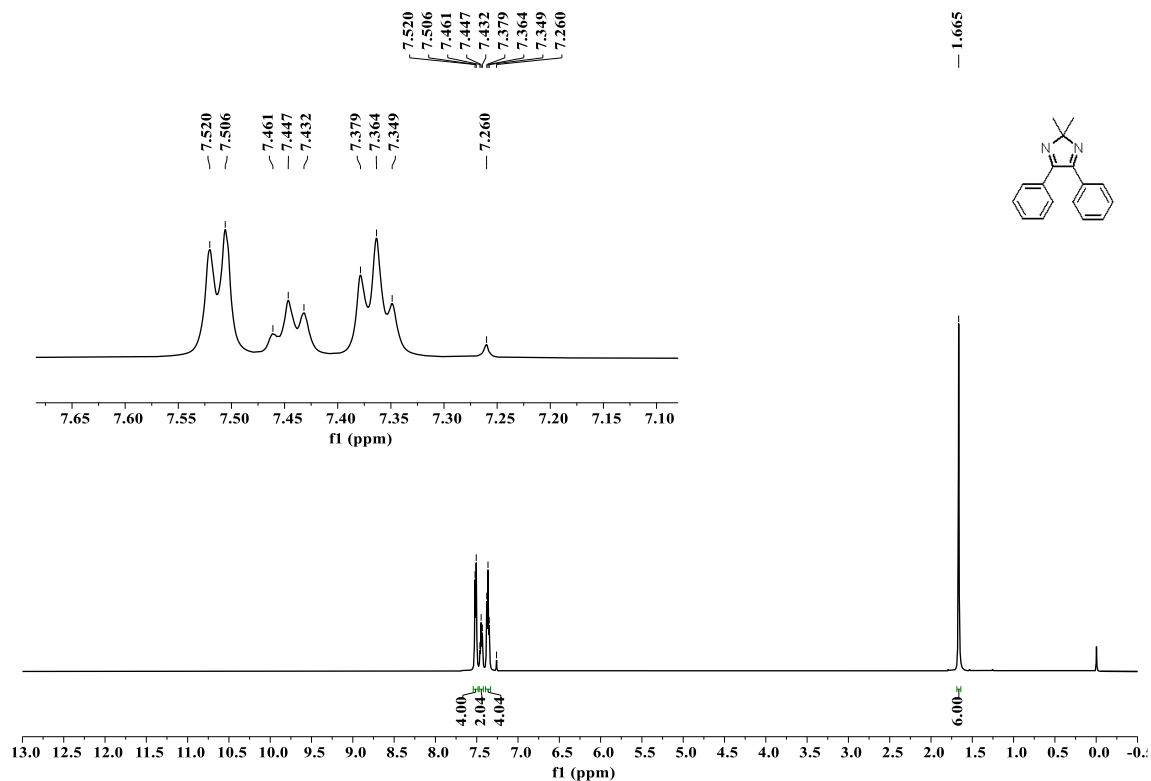

## $^{13}\text{C}$ NMR (500 MHz, $\text{CDCl}_3$ ) of **1a**

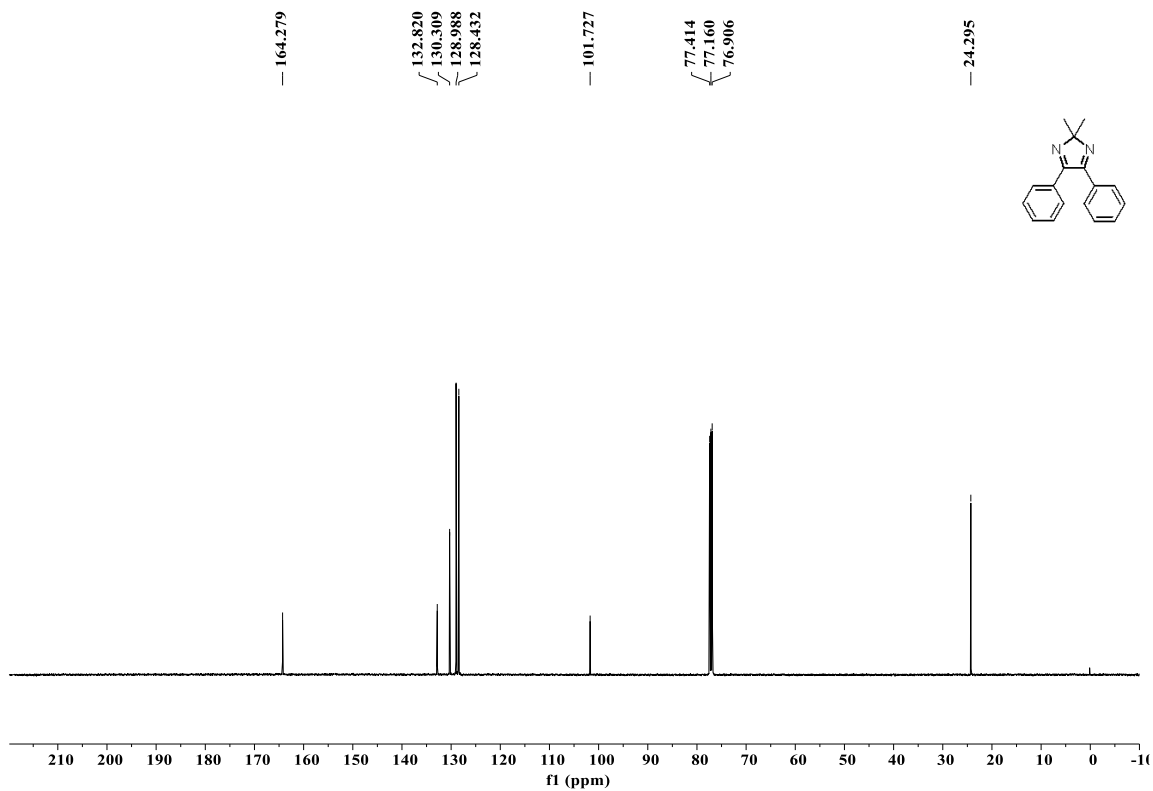

$^1\text{H}$  NMR (500 MHz,  $\text{CDCl}_3$ ) of **1b**

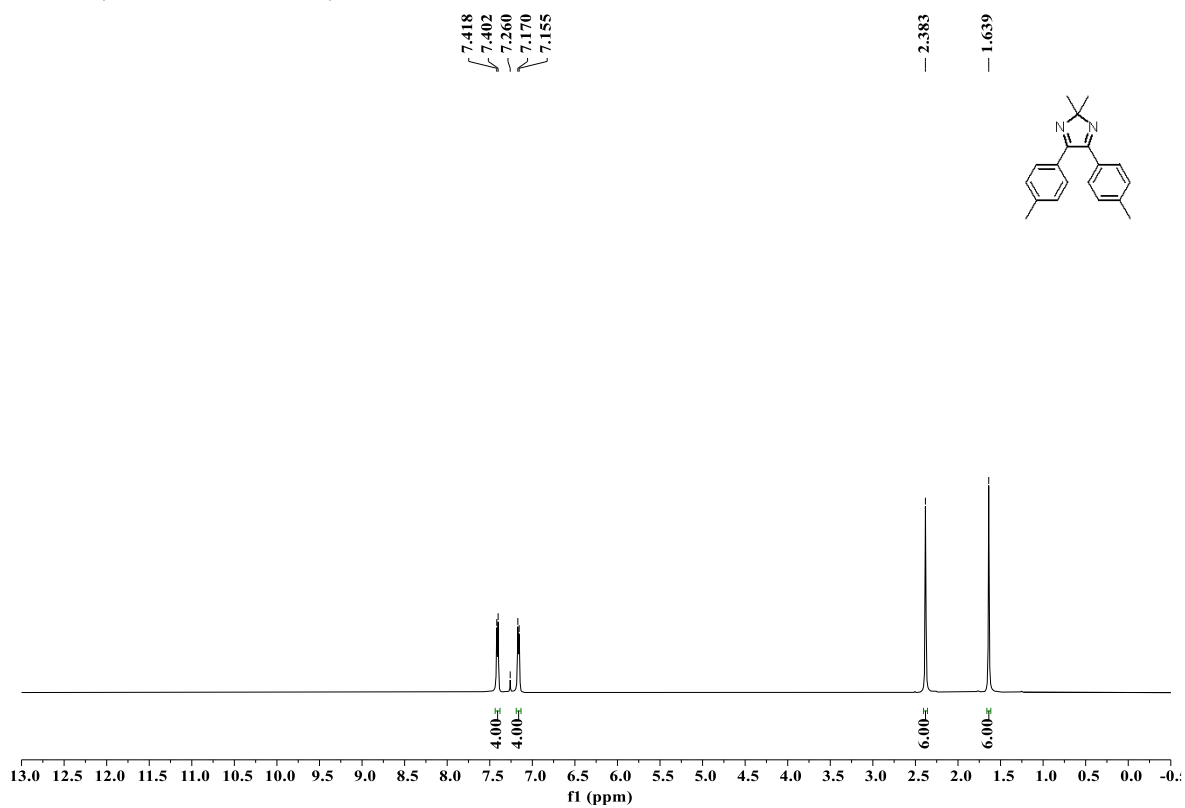

$^{13}\text{C}$  NMR (500 MHz,  $\text{CDCl}_3$ ) of **1b**

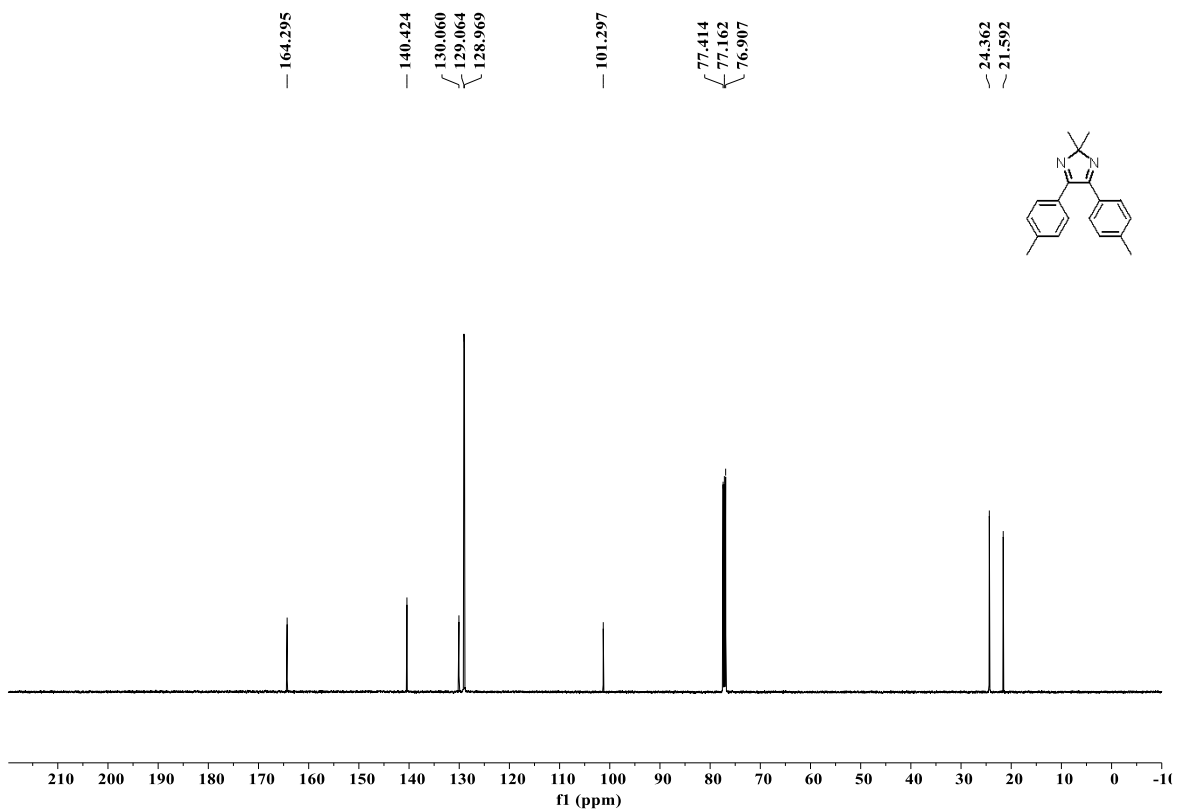

<sup>1</sup>H NMR (500 MHz, CDCl<sub>3</sub>) of **1c**

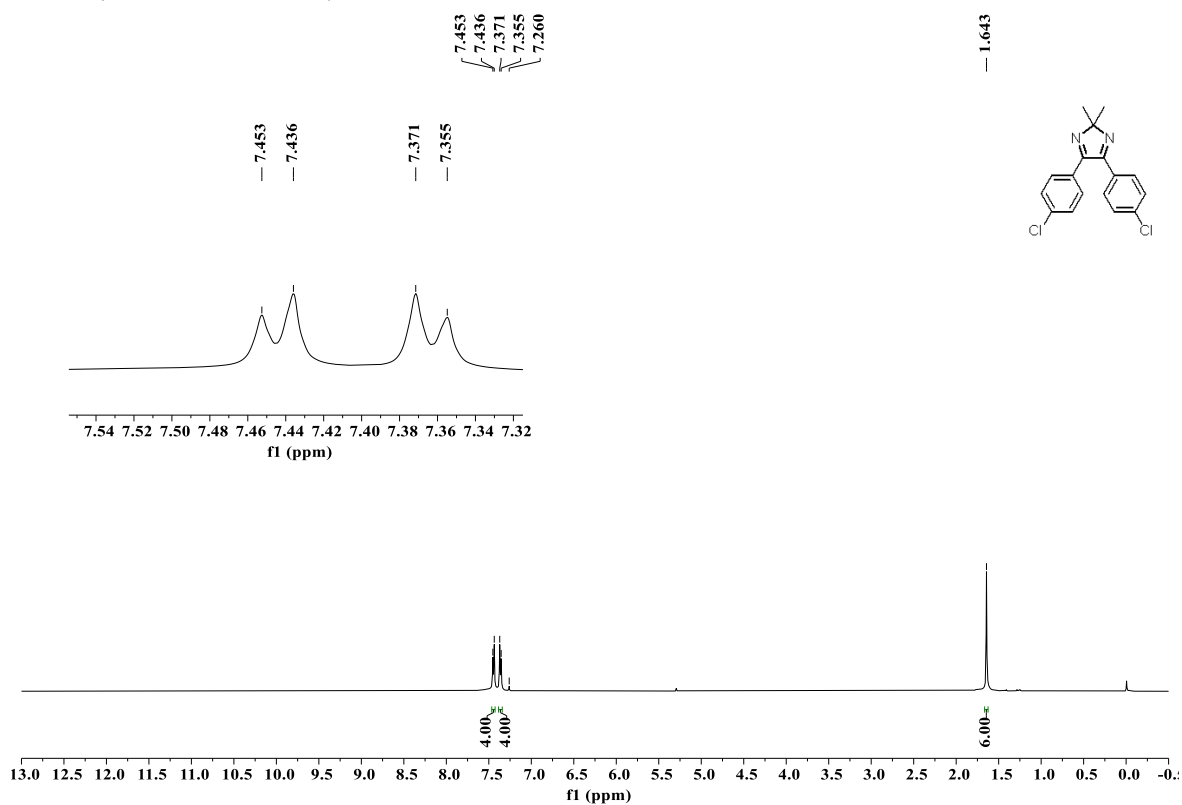

<sup>13</sup>C NMR (500 MHz, CDCl<sub>3</sub>) of **1c**

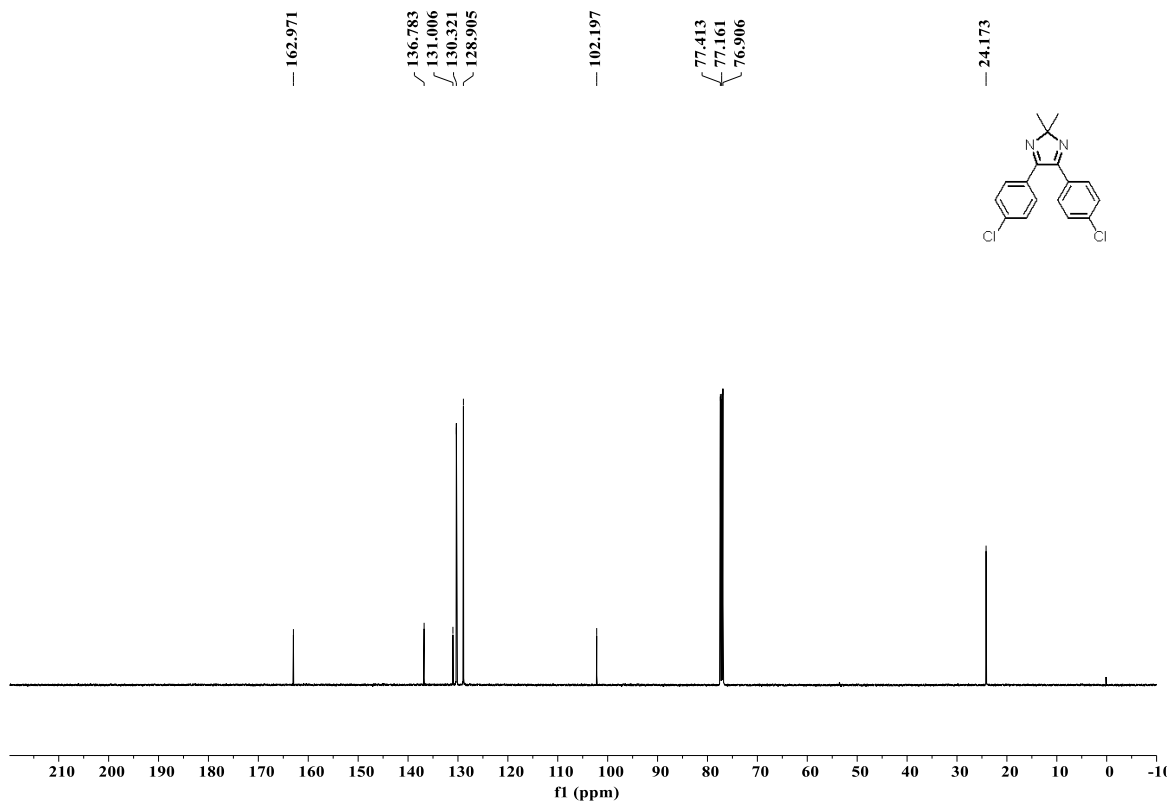

$^1\text{H}$  NMR (500 MHz,  $\text{CDCl}_3$ ) of **1d**

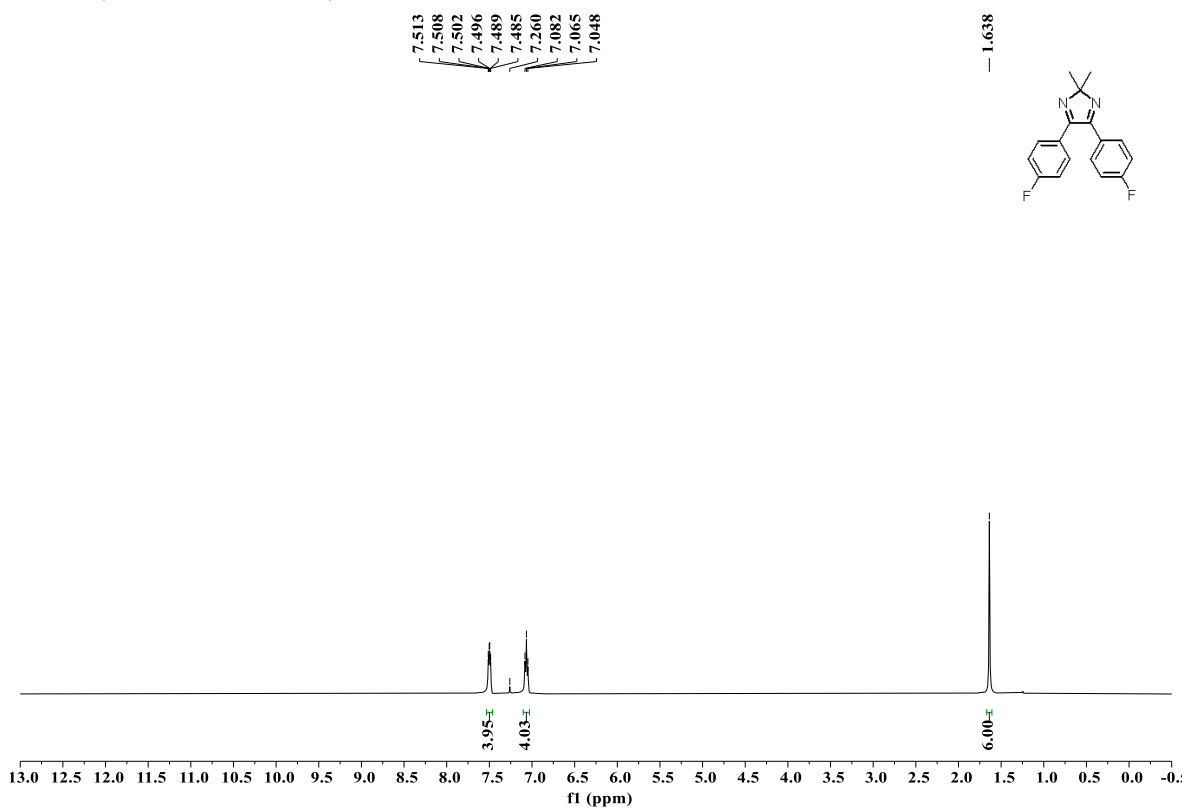

$^{13}\text{C}$  NMR (500 MHz,  $\text{CDCl}_3$ ) of **1d**

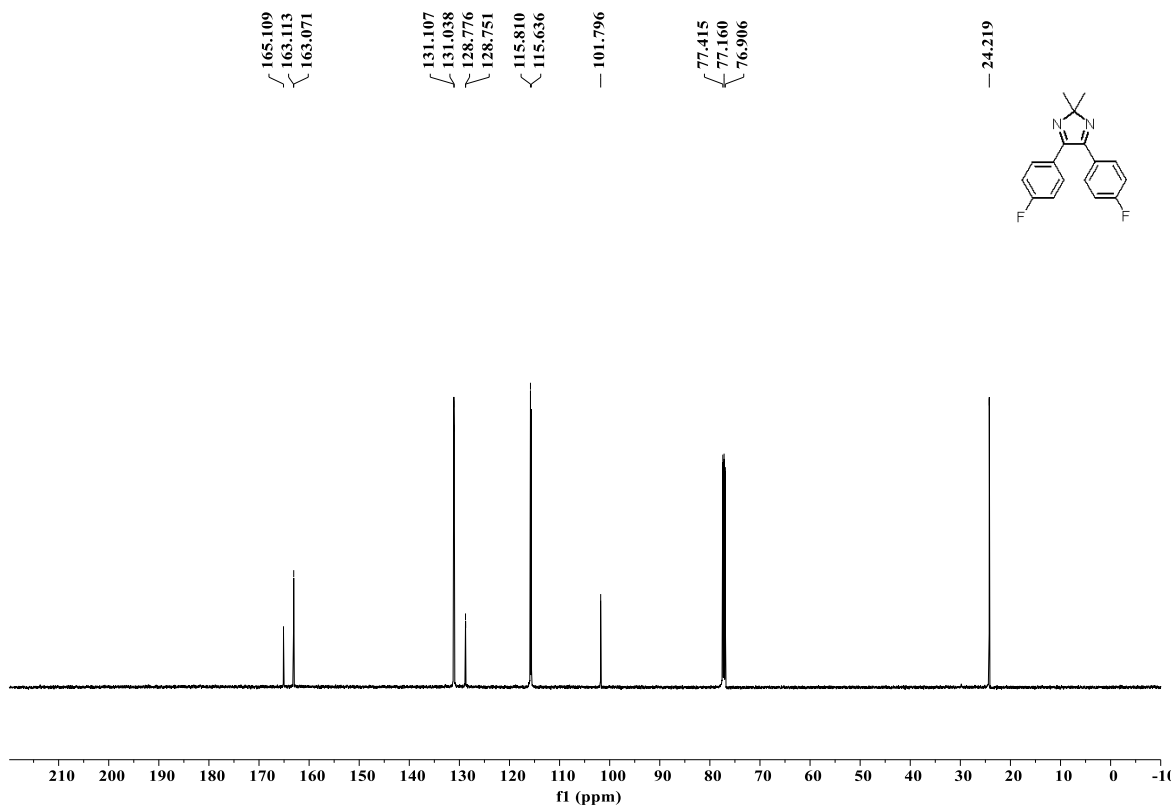

$^1\text{H}$  NMR (500 MHz,  $\text{CDCl}_3$ ) of **1e**

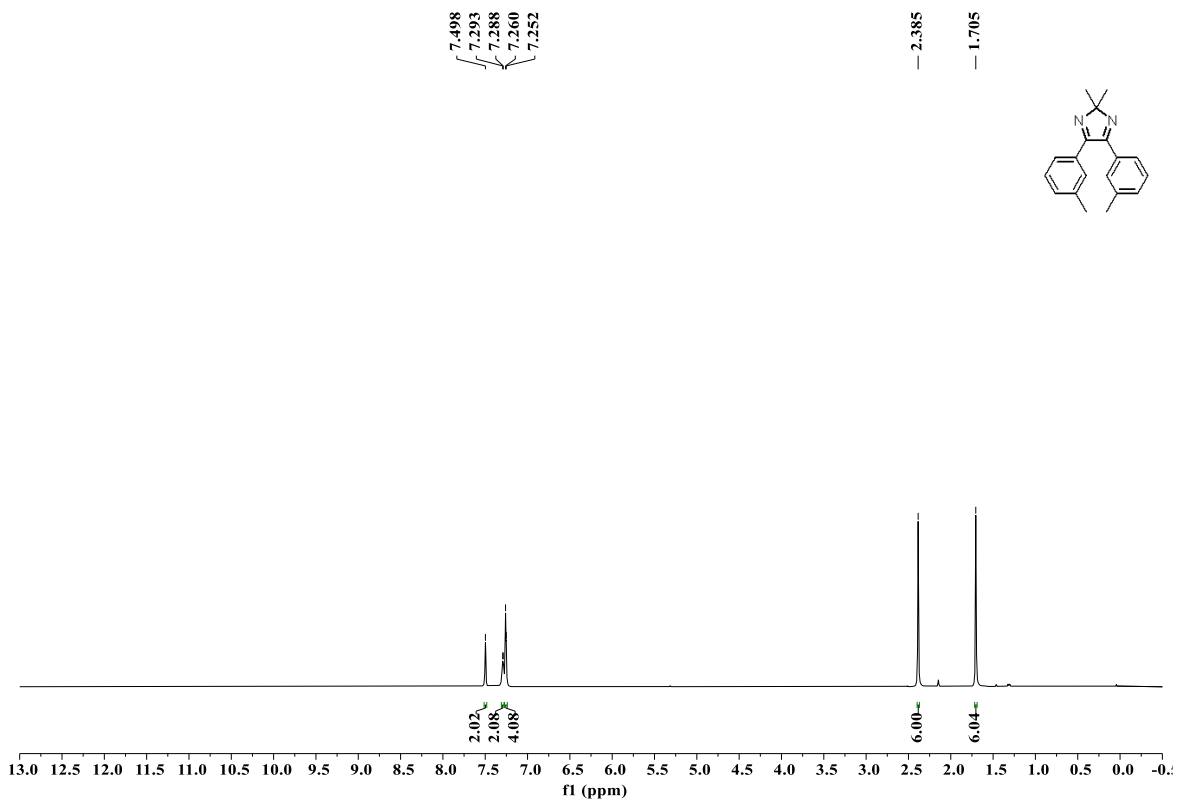

$^{13}\text{C}$  NMR (500 MHz,  $\text{CDCl}_3$ ) of **1d**

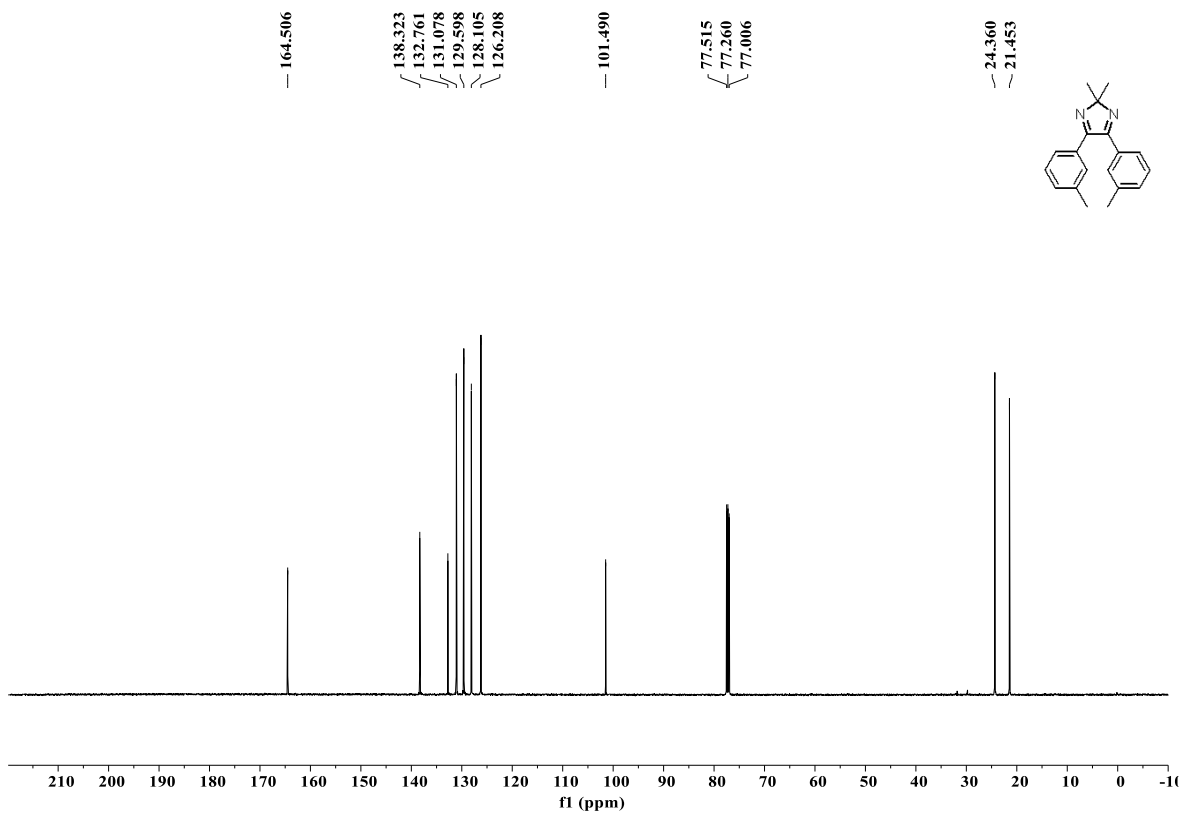

$^1\text{H}$  NMR (500 MHz,  $\text{CDCl}_3$ ) of **1f**

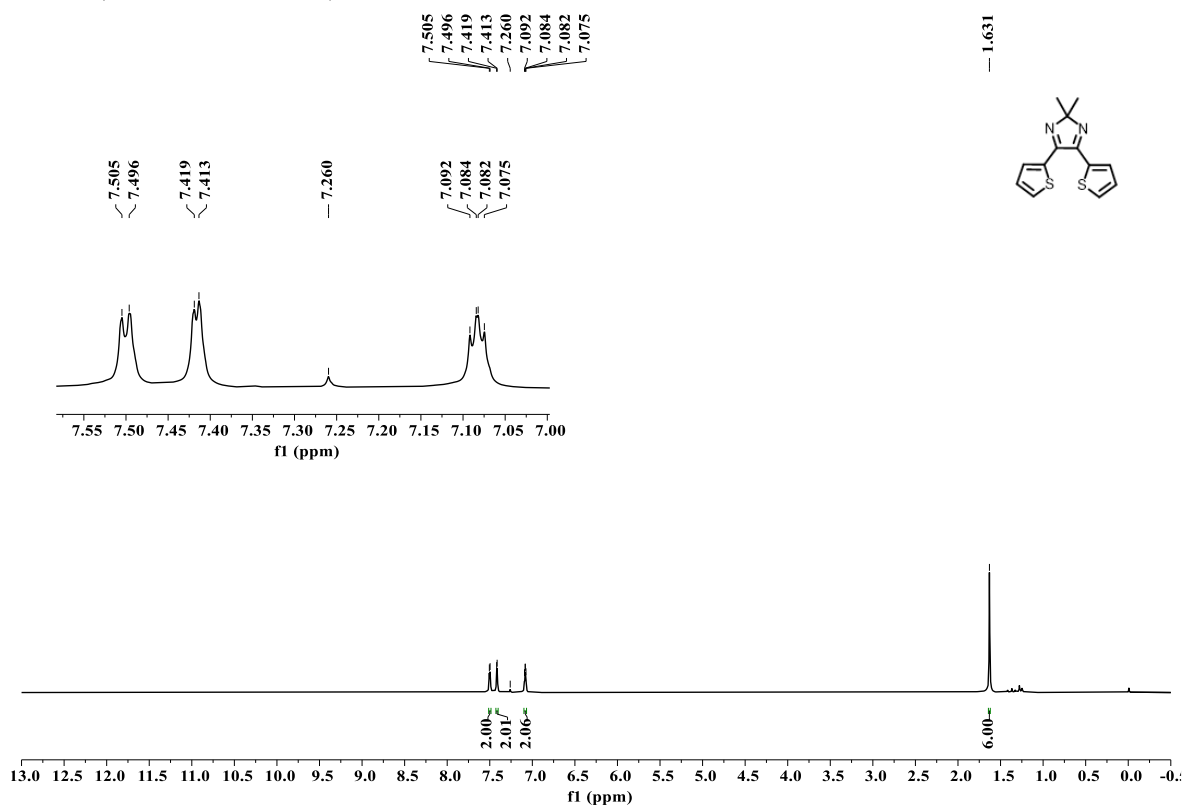

$^{13}\text{C}$  NMR (500 MHz,  $\text{CDCl}_3$ ) of **1f**

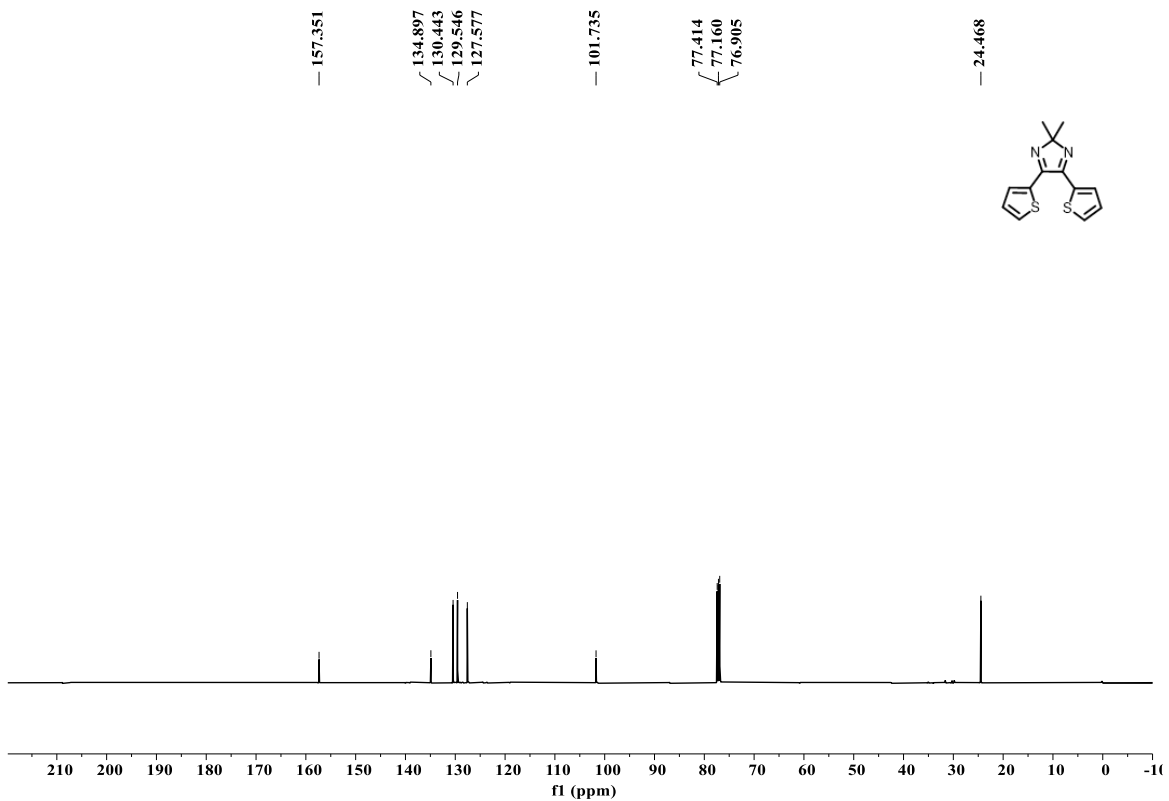

<sup>1</sup>H NMR (500 MHz, CDCl<sub>3</sub>) of **1g**

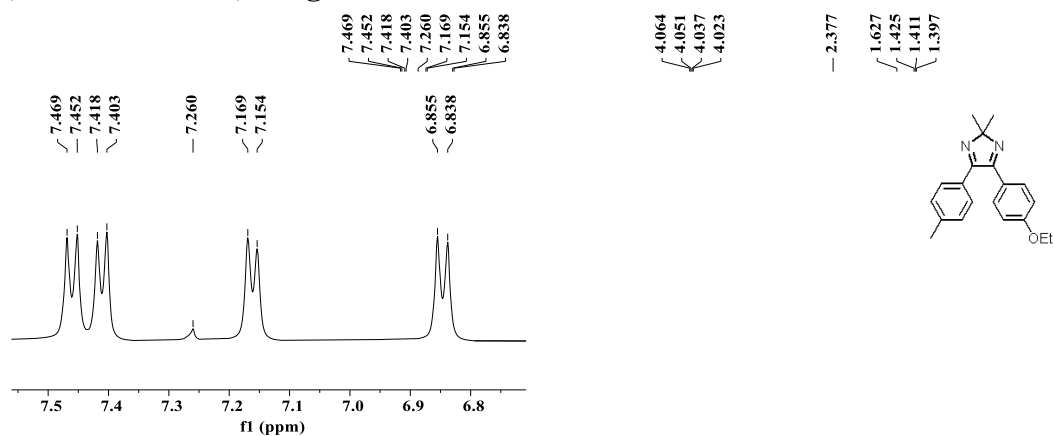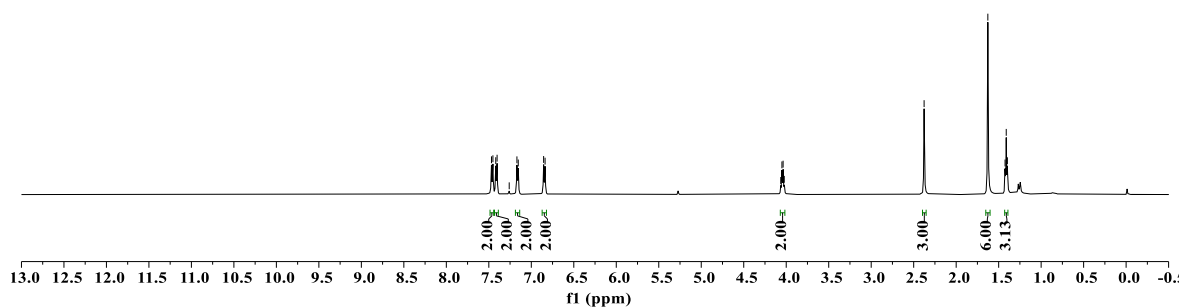

<sup>13</sup>C NMR (500 MHz, CDCl<sub>3</sub>) of **1g**

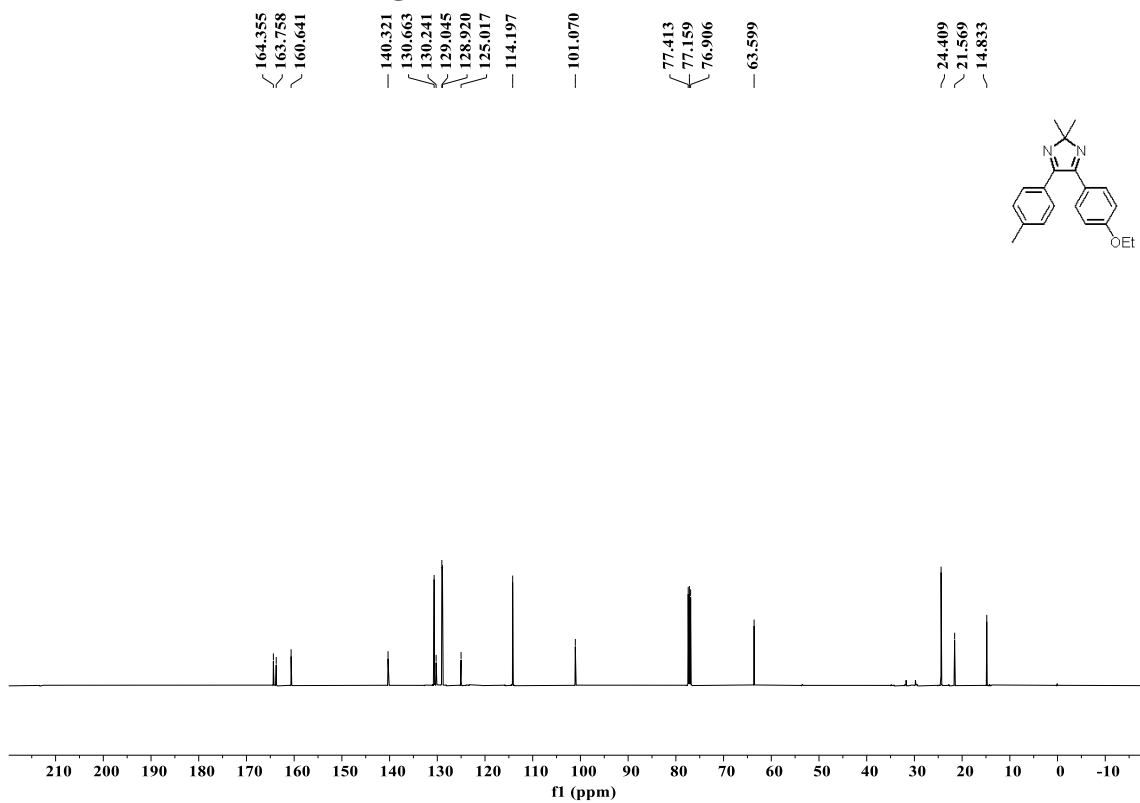

<sup>1</sup>H NMR (500 MHz, DMSO-*d*<sub>6</sub>) of Int-C

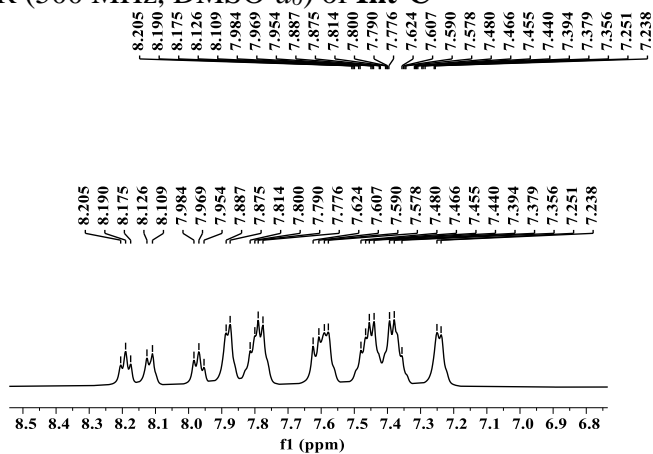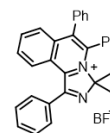

<sup>13</sup>C NMR (125 MHz, DMSO-*d*<sub>6</sub>) of Int-C

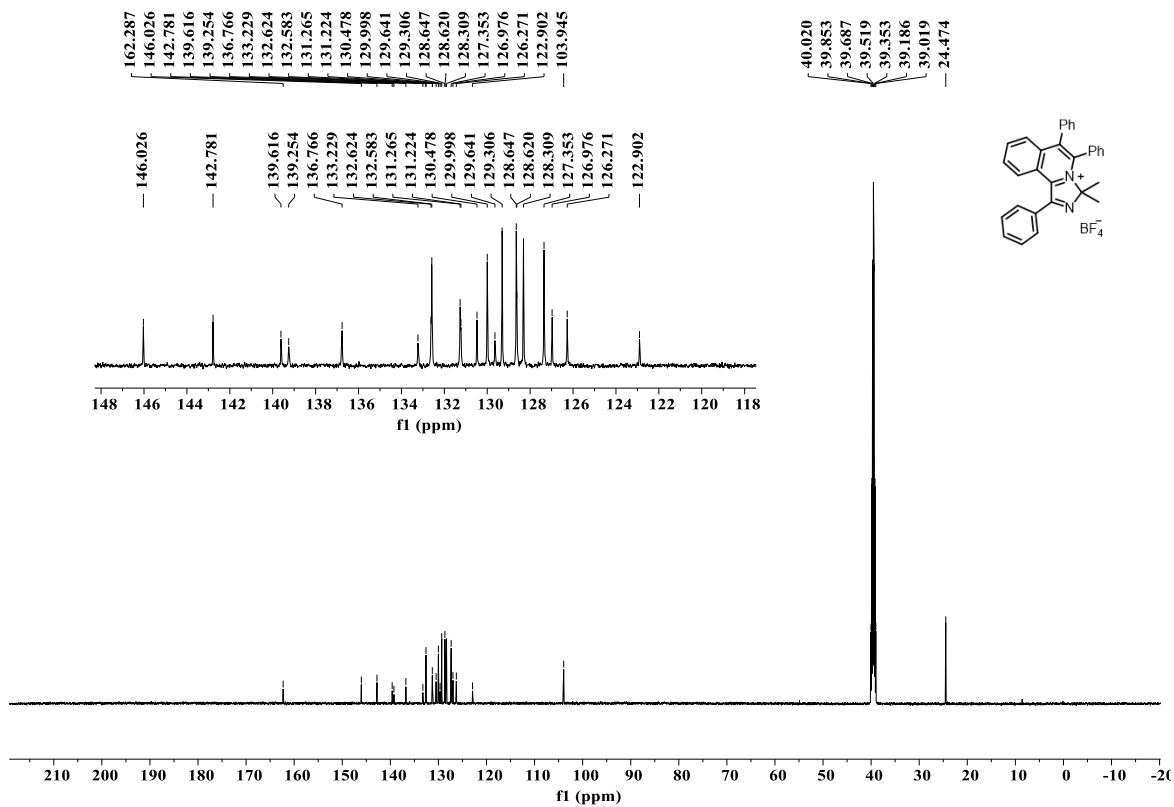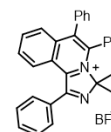



$^{19}\text{F}$  NMR (470 MHz,  $\text{DMSO-}d_6$ ) of **Int-C**

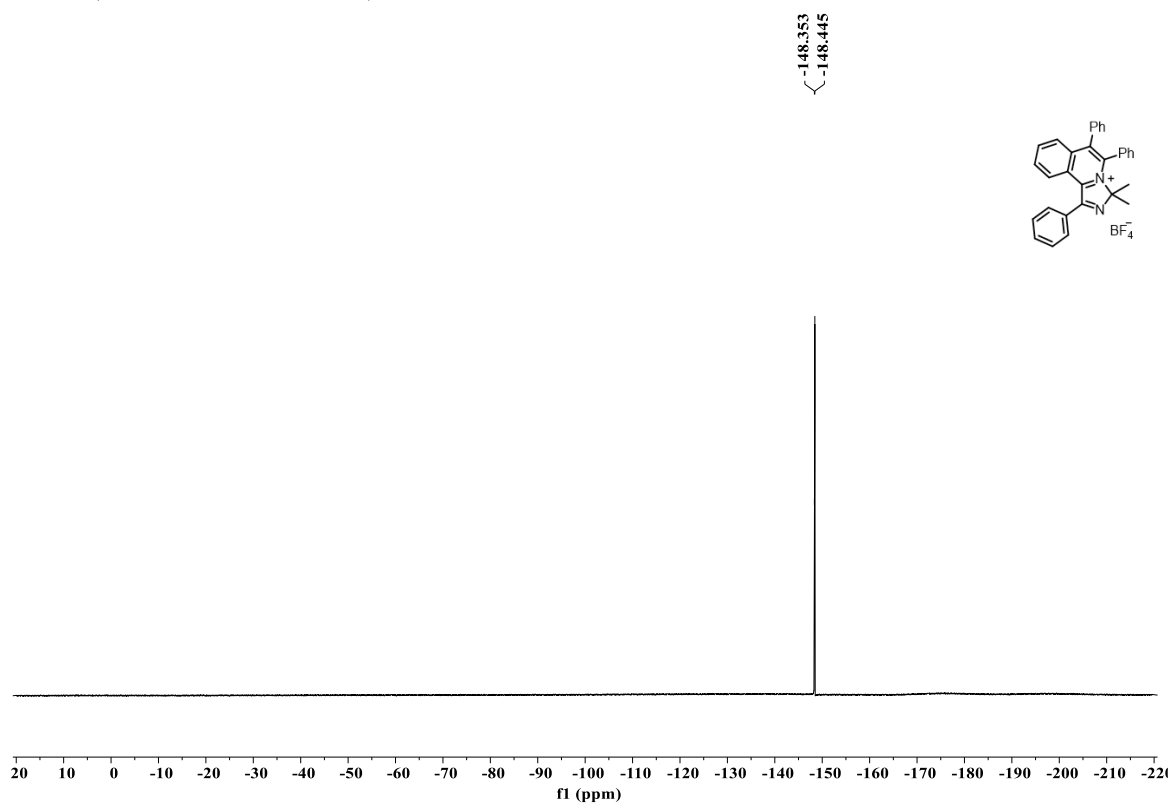

<sup>1</sup>H NMR (500 MHz, CDCl<sub>3</sub>) of **3a'**

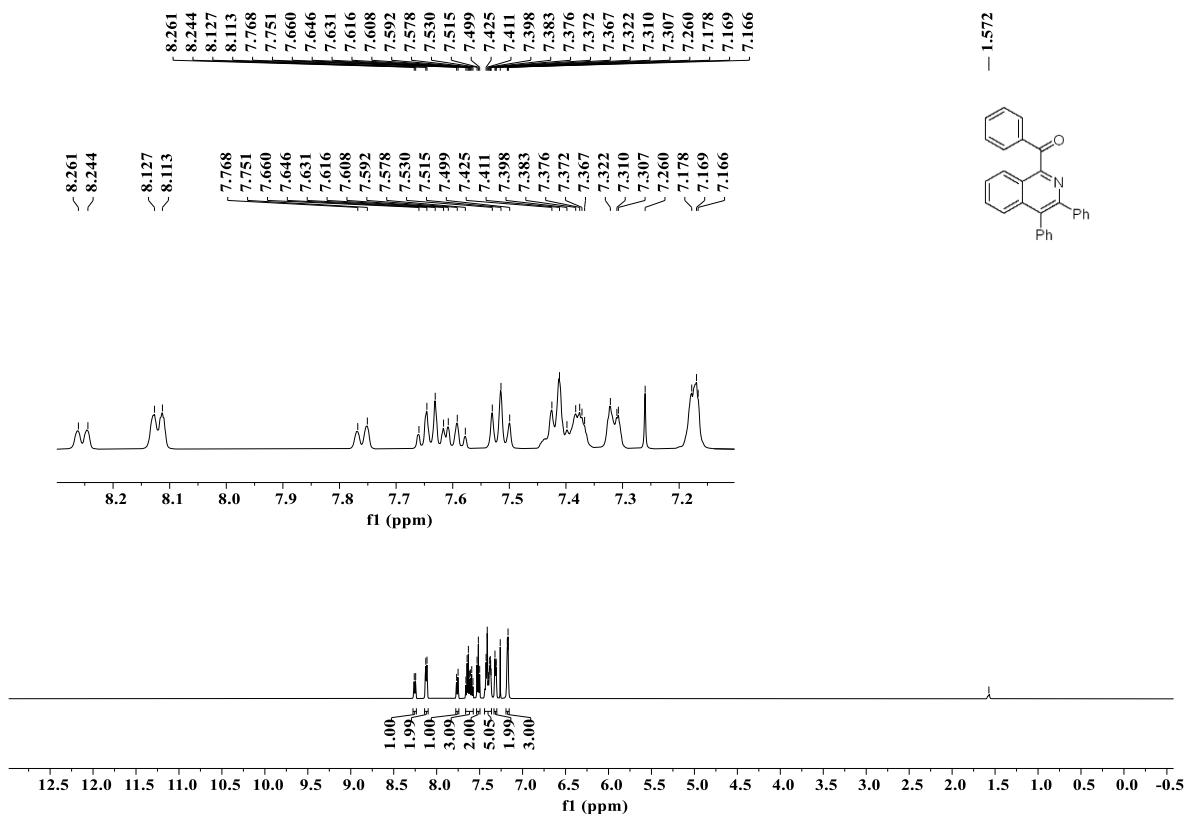

<sup>13</sup>C NMR (125 MHz, CDCl<sub>3</sub>) of **3a'**

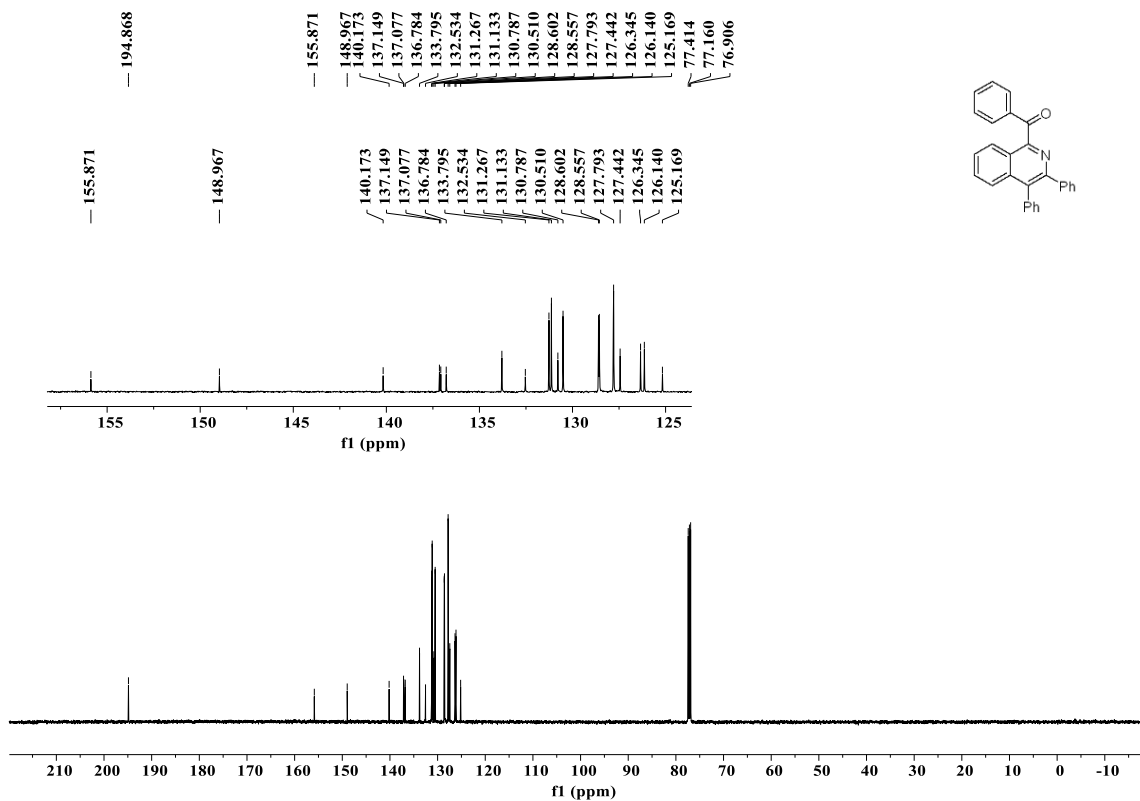

<sup>1</sup>H NMR (500 MHz, CDCl<sub>3</sub>) of **3a**

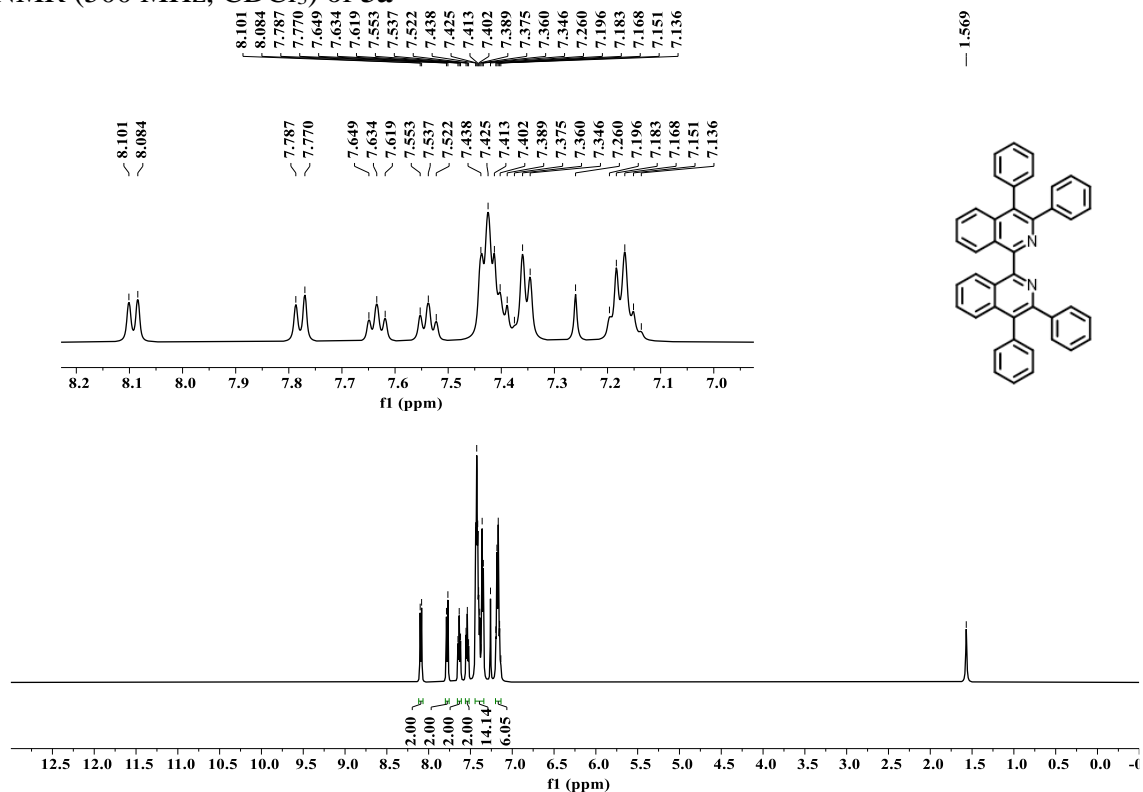

<sup>1</sup>H NMR (500 MHz, CDCl<sub>3</sub>) of **3b**

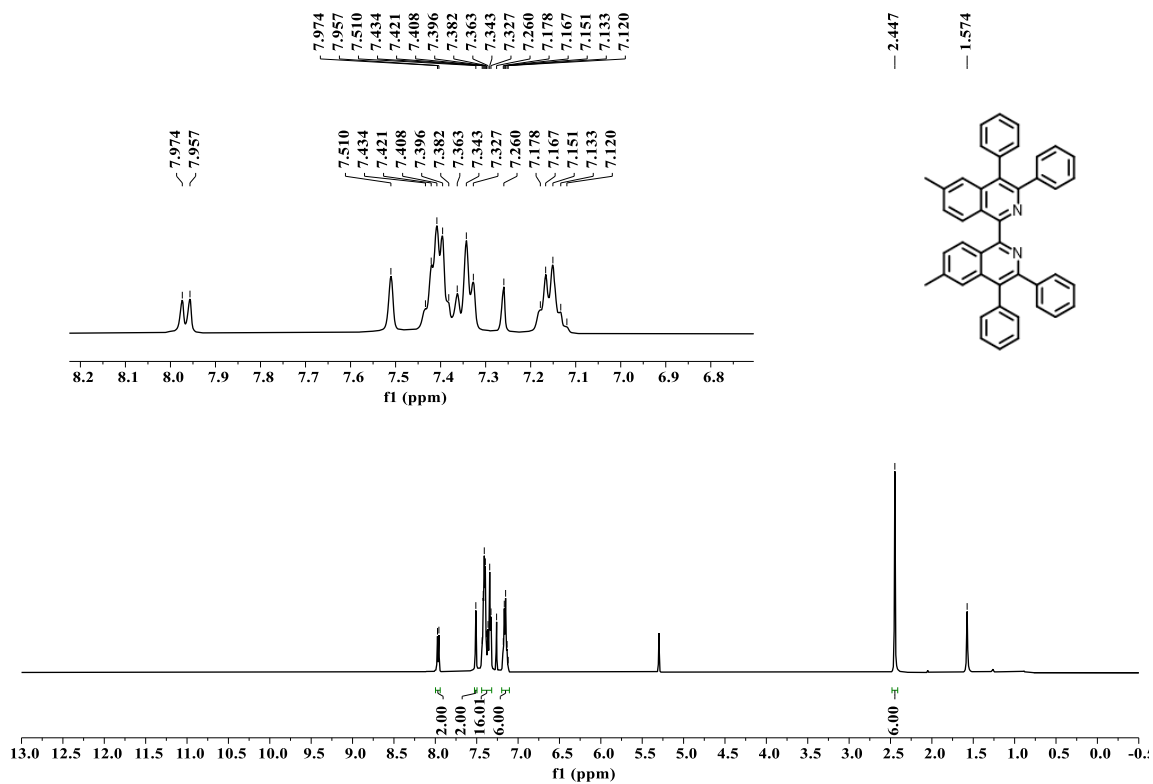

<sup>1</sup>H NMR (500 MHz, CDCl<sub>3</sub>) of **3c**

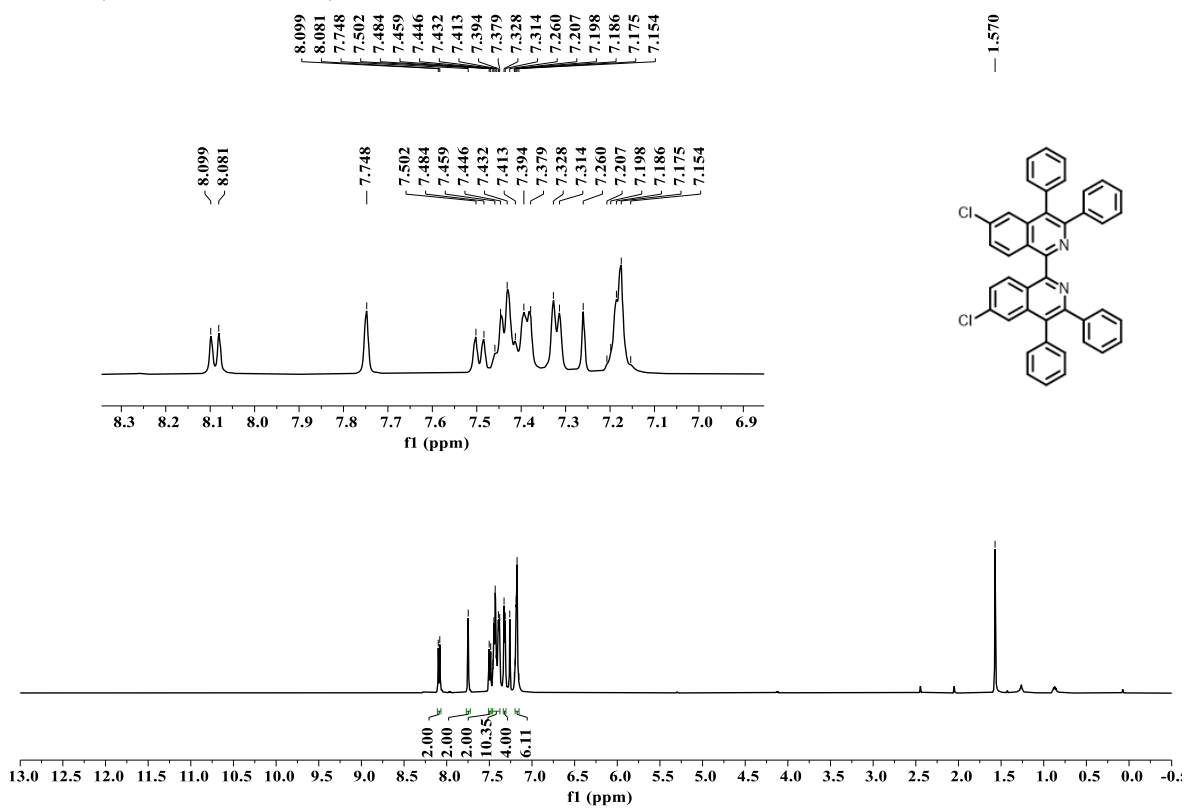

<sup>1</sup>H NMR (500 MHz, CDCl<sub>3</sub>) of **3d**

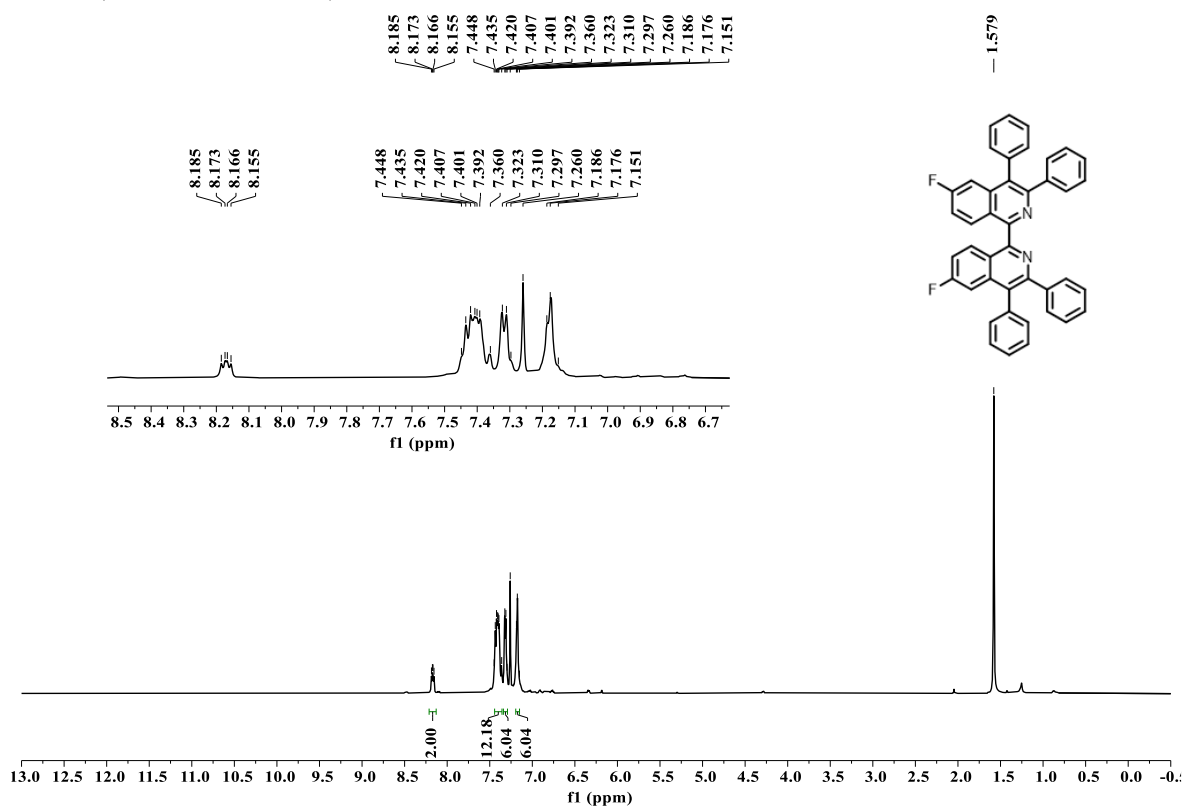

$^1\text{H}$  NMR (500 MHz,  $\text{CDCl}_3$ ) of **3e**

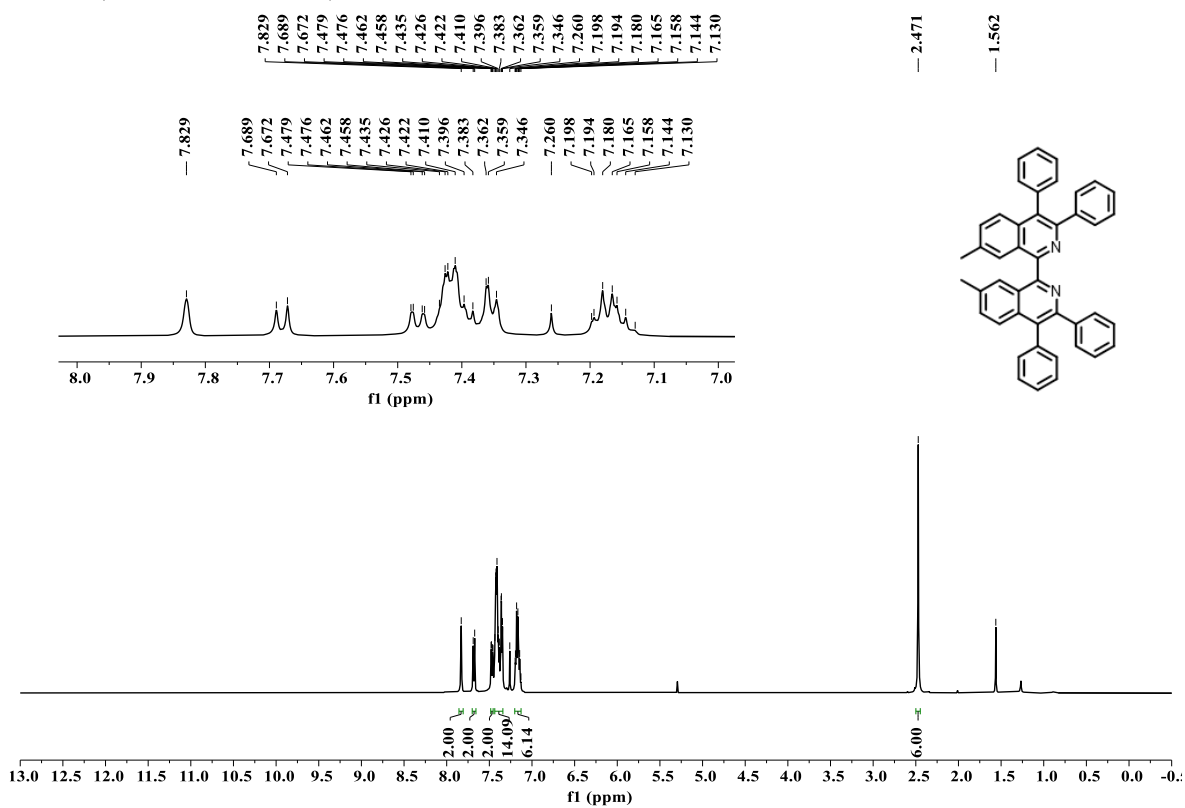

$^1\text{H}$  NMR (500 MHz,  $\text{CDCl}_3$ ) of **3f**

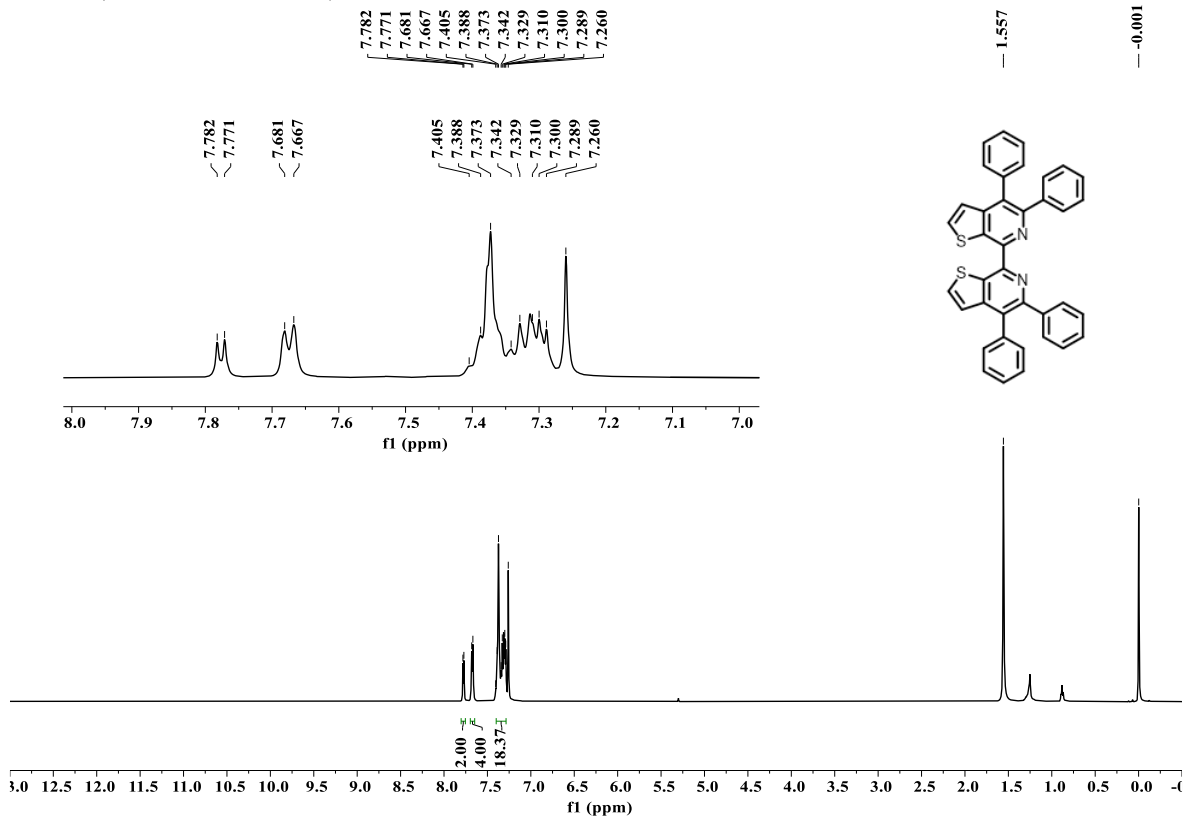

$^{13}\text{C}$  NMR (125 MHz,  $\text{CDCl}_3$ ) of **3f**

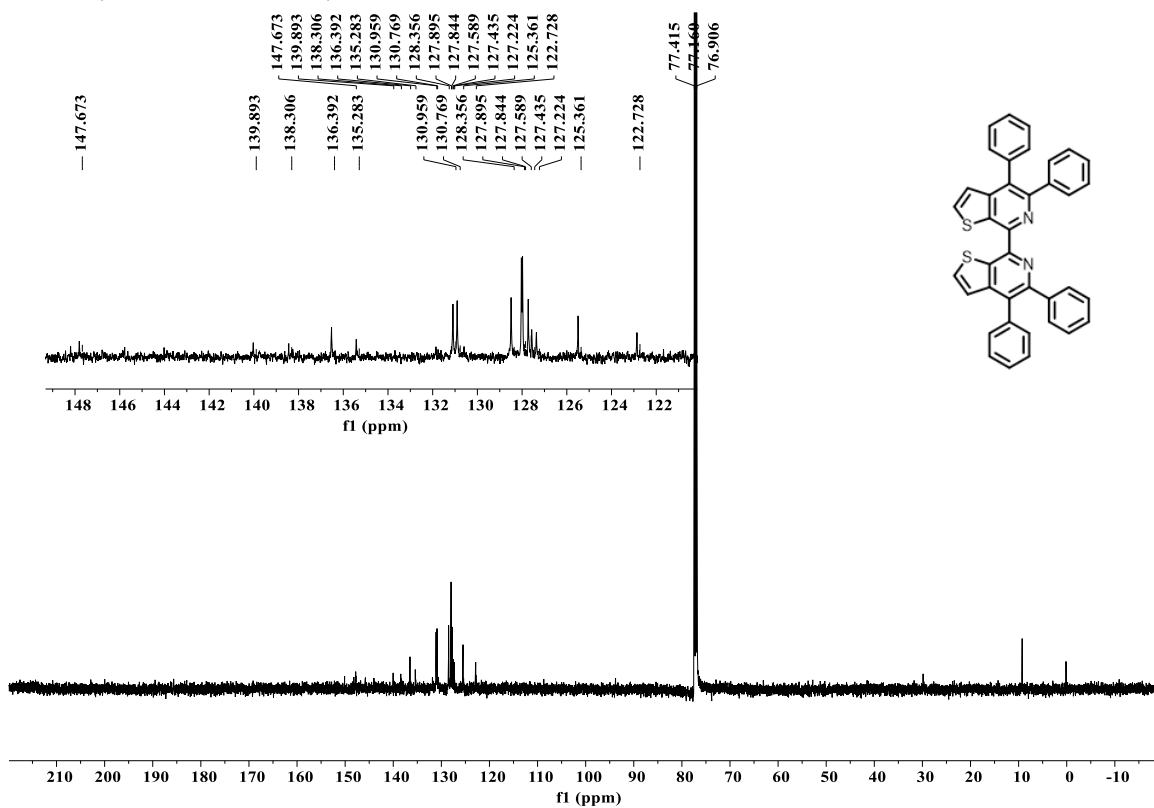

$^1\text{H}$  NMR (500 MHz,  $\text{CDCl}_3$ ) of **3g**

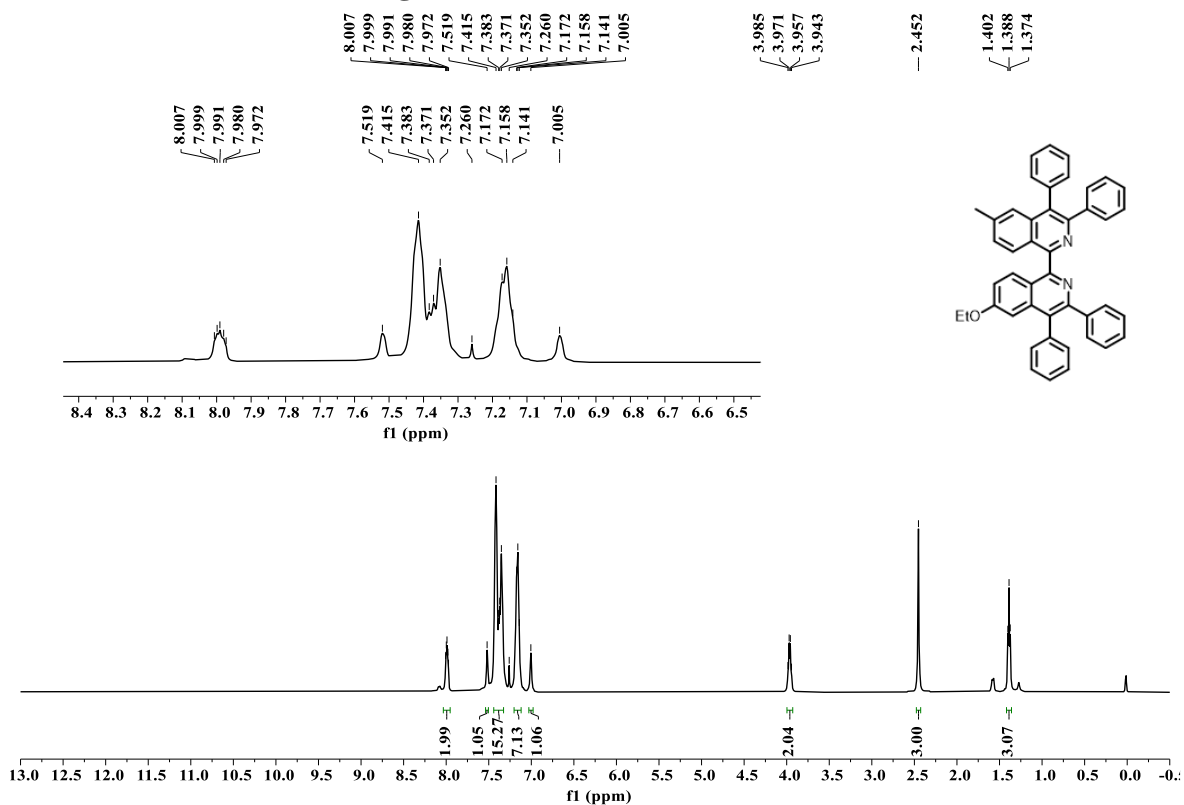

<sup>1</sup>H NMR (500 MHz, CDCl<sub>3</sub>) of **3h**

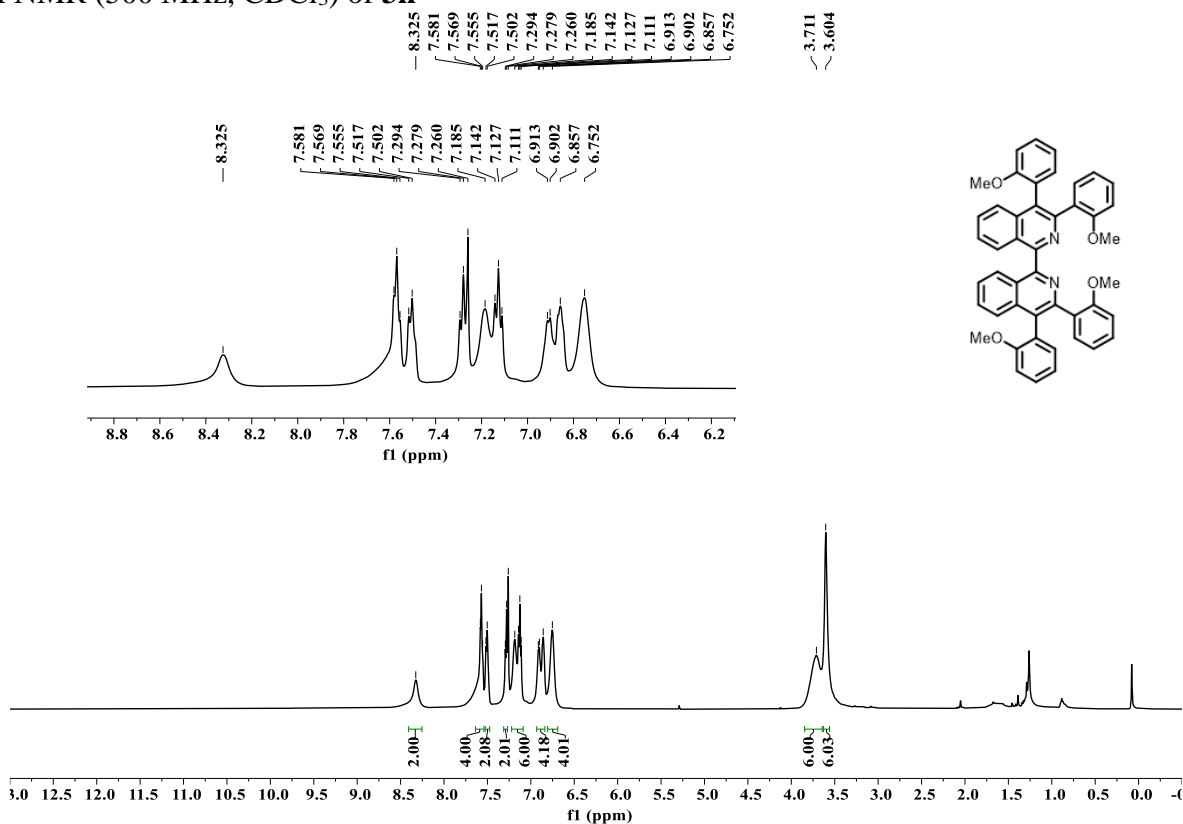

<sup>1</sup>H NMR (500 MHz, CDCl<sub>3</sub>) of **3i**

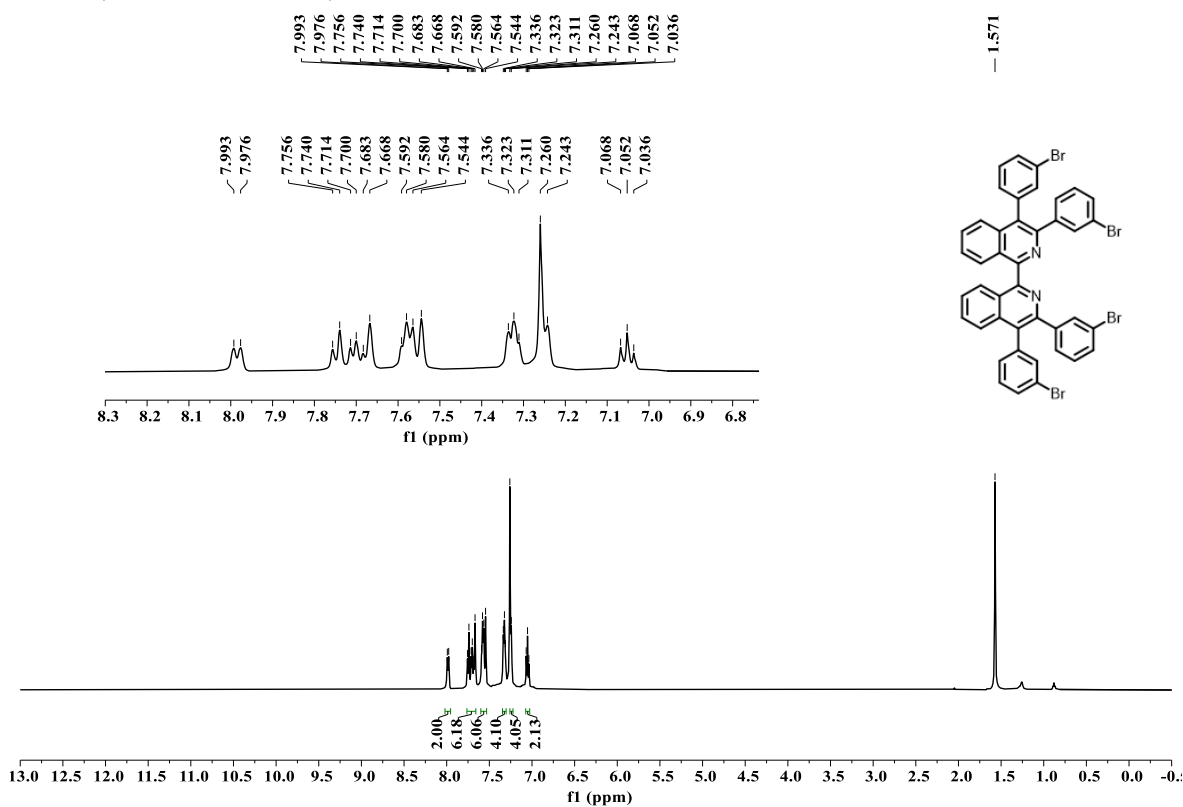

$^{13}\text{C}$  NMR (125 MHz,  $\text{CDCl}_3$ ) of **3i**

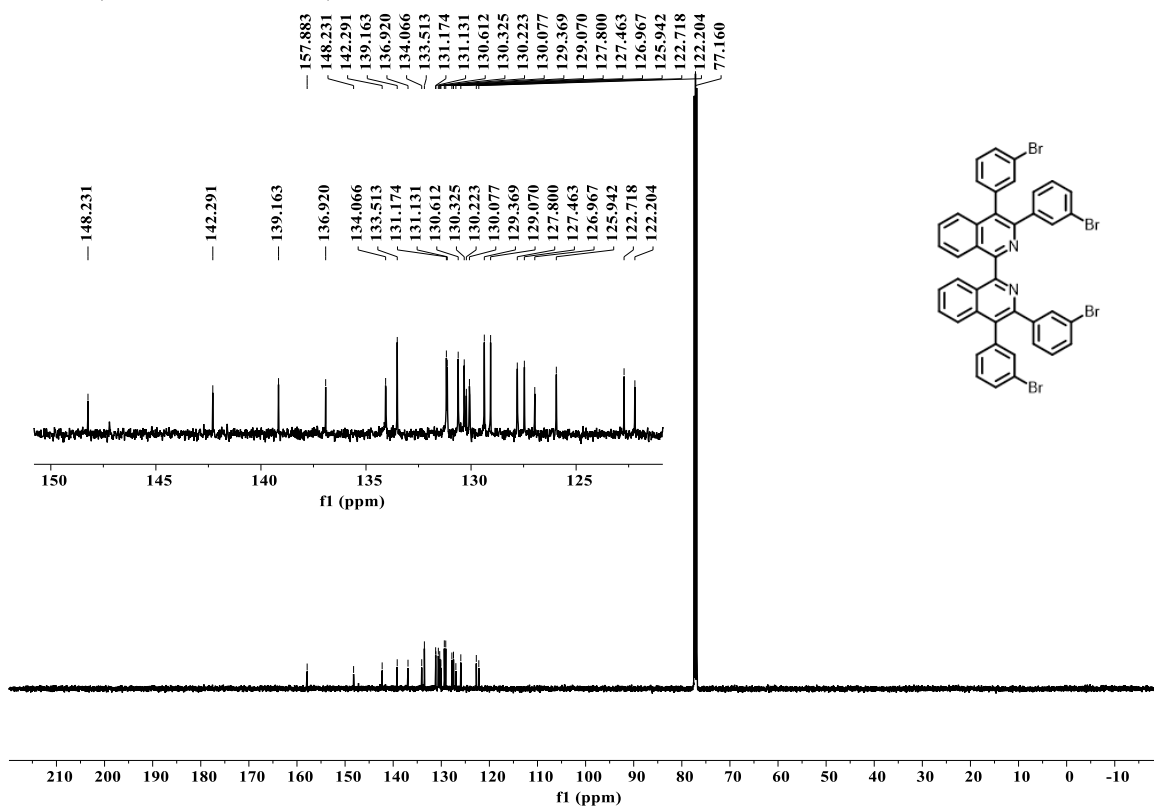

$^1\text{H}$  NMR (500 MHz,  $\text{CDCl}_3$ ) of **3j**

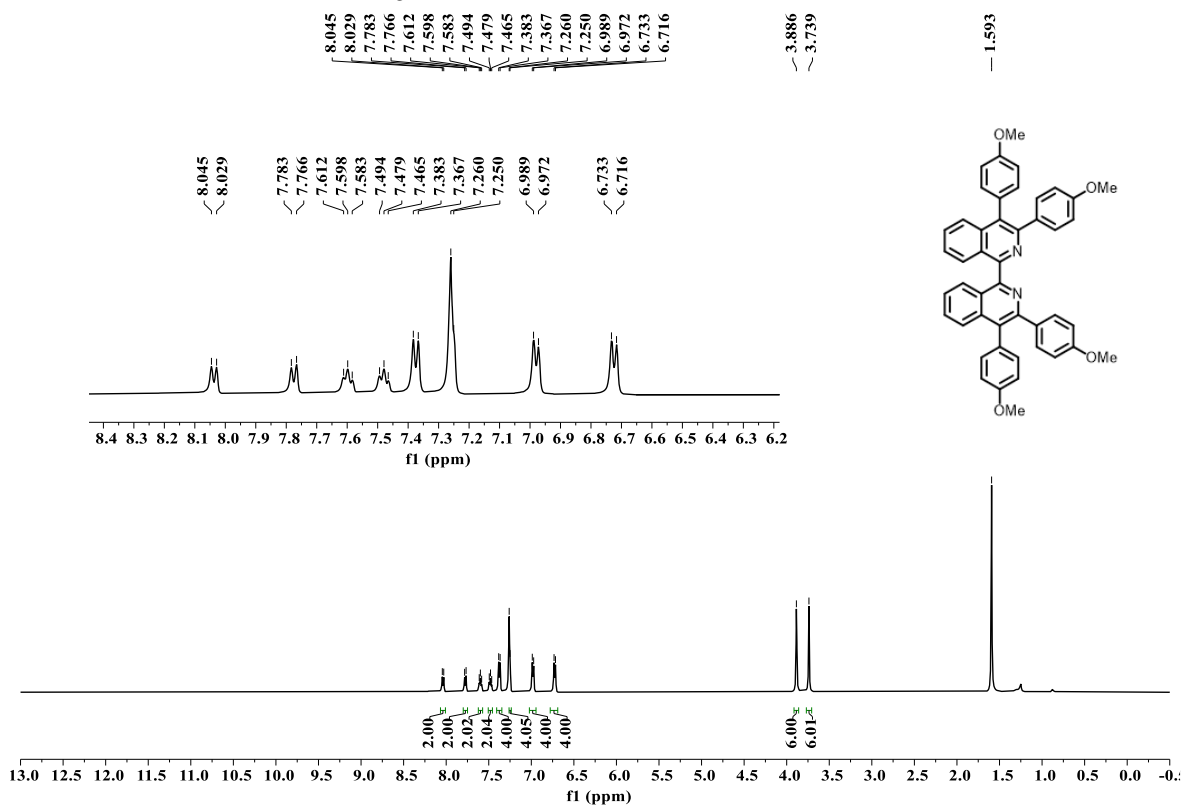



<sup>1</sup>H NMR (500 MHz, CDCl<sub>3</sub>) of **3k**

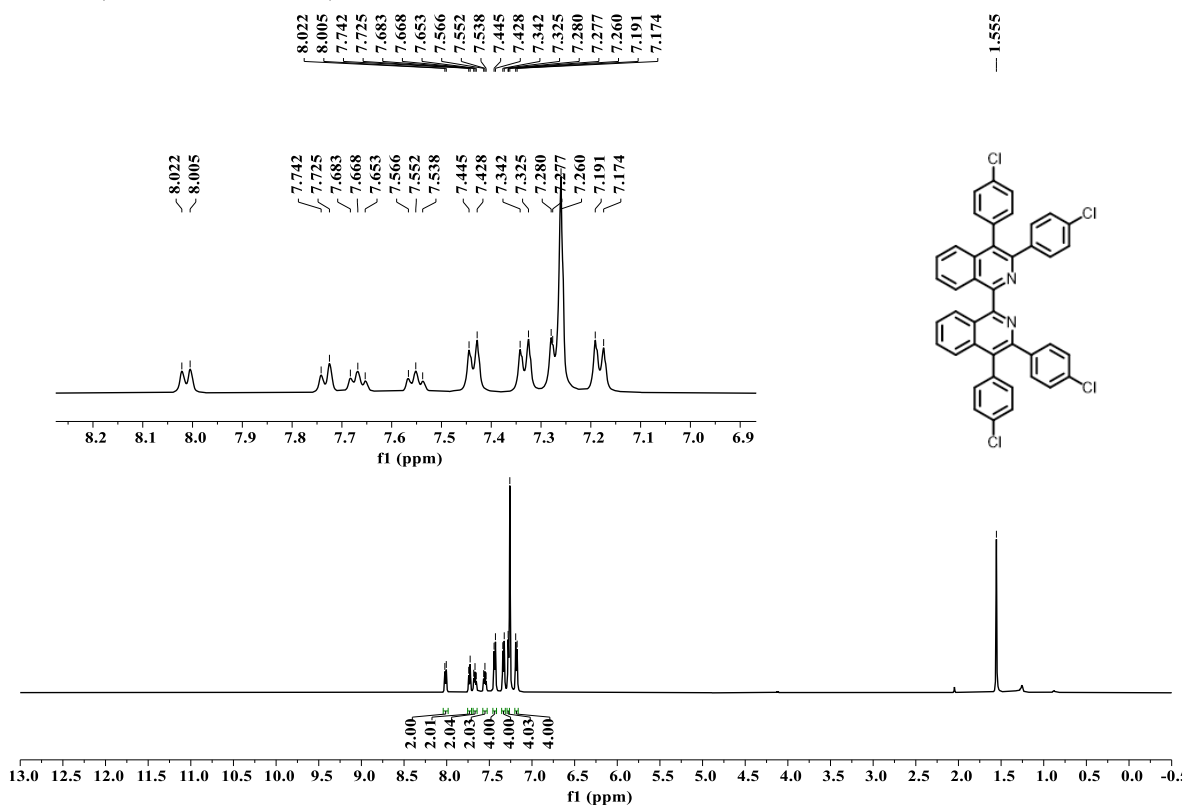

<sup>1</sup>H NMR (500 MHz, CDCl<sub>3</sub>) of **3l**

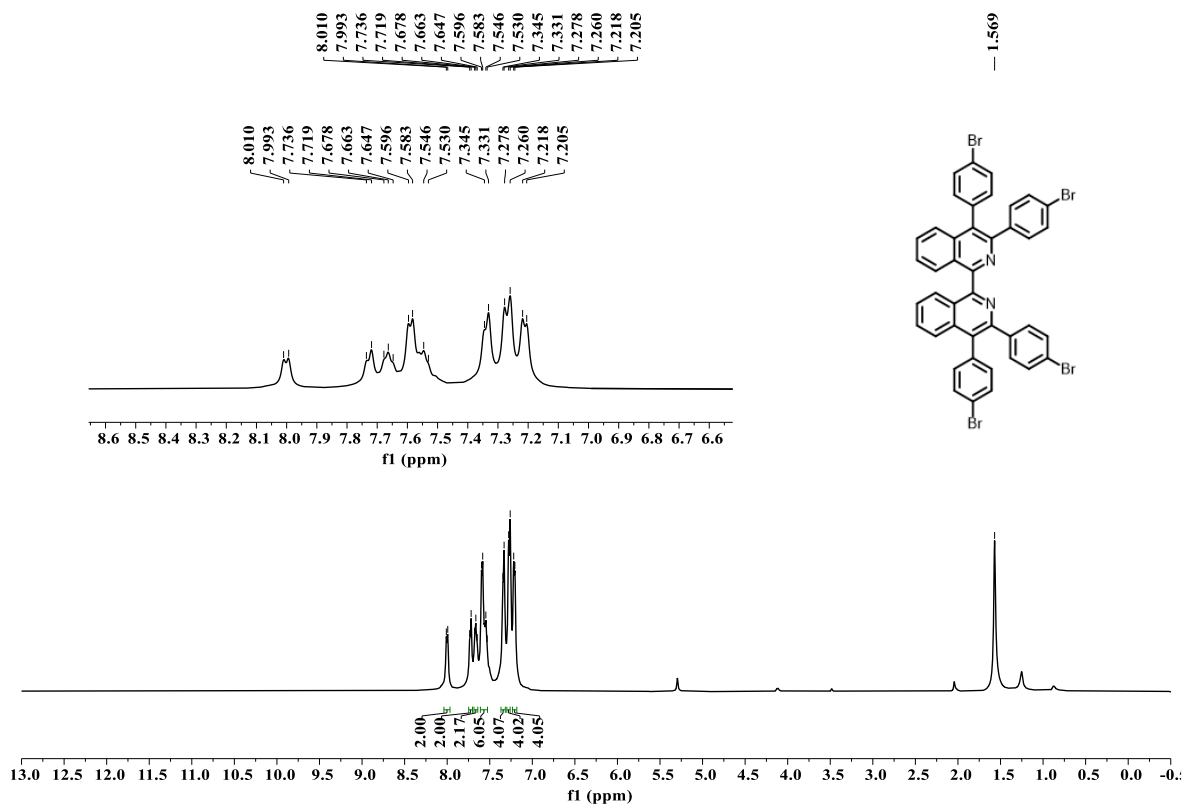

$^1\text{H}$  NMR (500 MHz,  $\text{CDCl}_3$ ) of **3m**

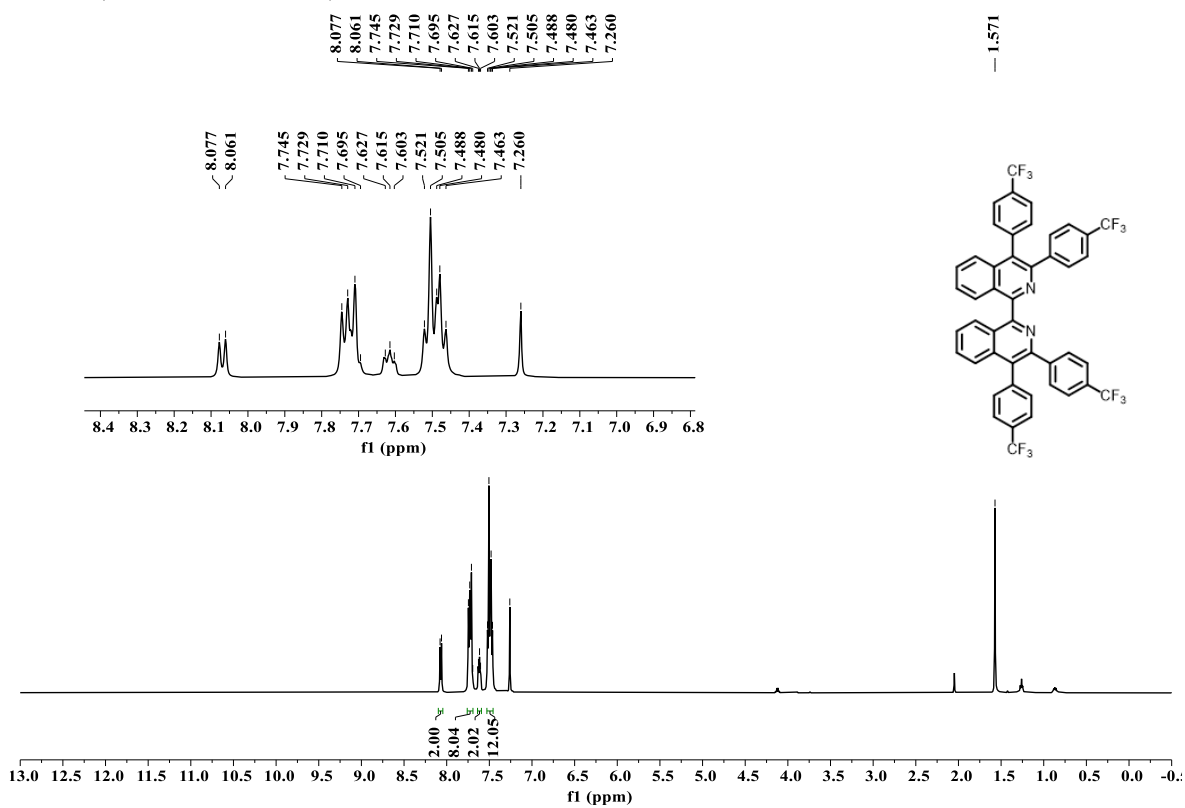

$^1\text{H}$  NMR (500 MHz,  $\text{CDCl}_3$ ) of **3n**

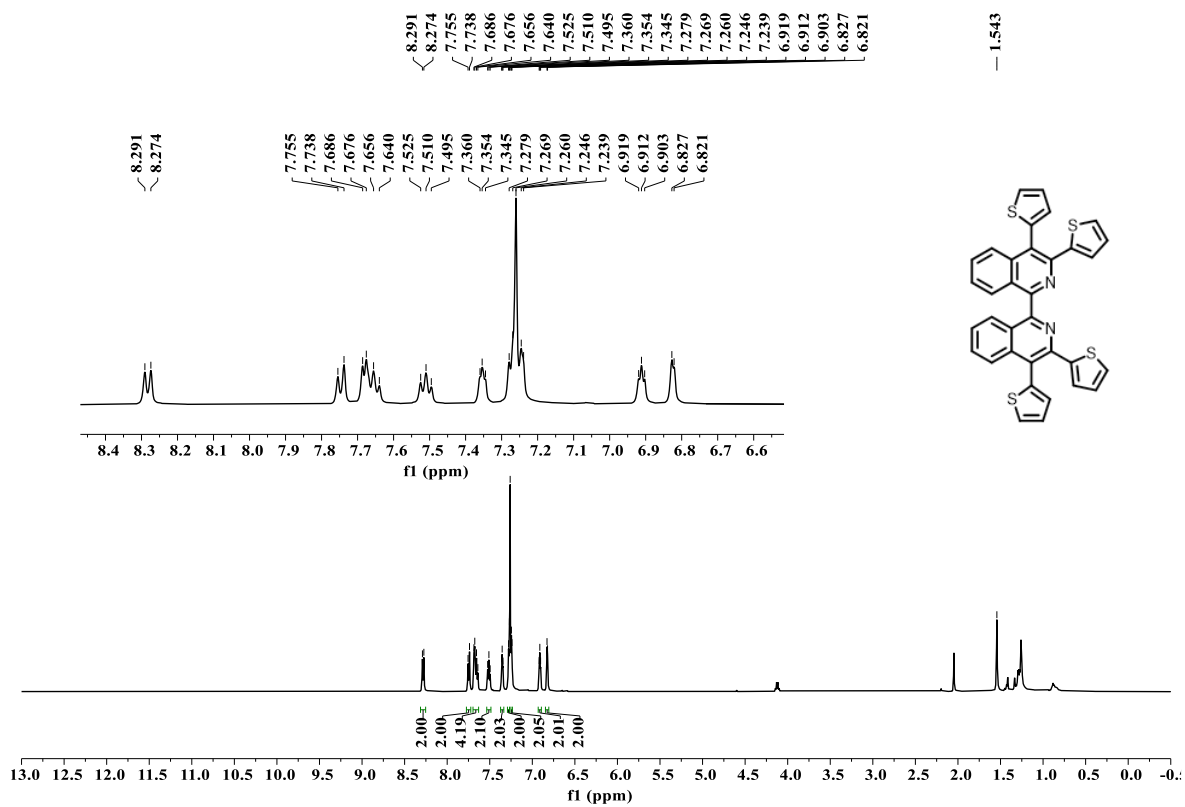

<sup>1</sup>H NMR (500 MHz, CDCl<sub>3</sub>) of **3o**

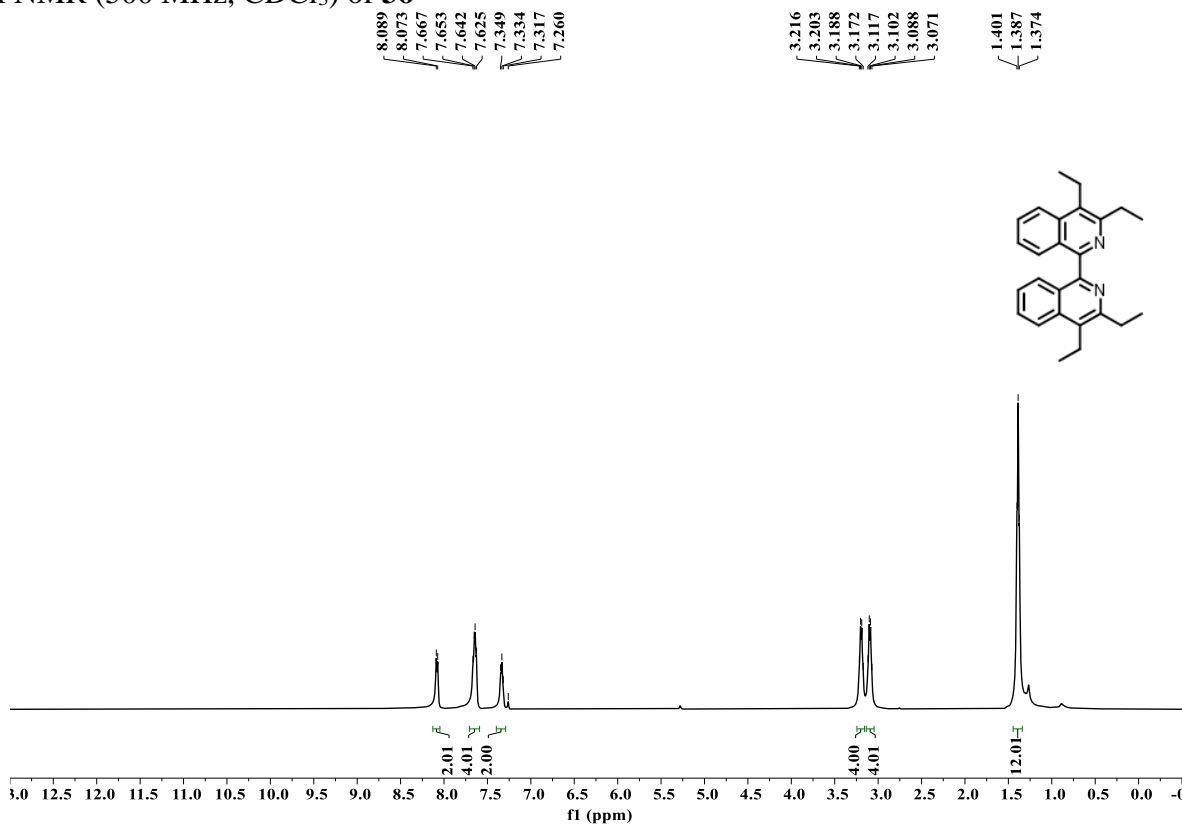

<sup>1</sup>H NMR (500 MHz, CDCl<sub>3</sub>) of **3p**

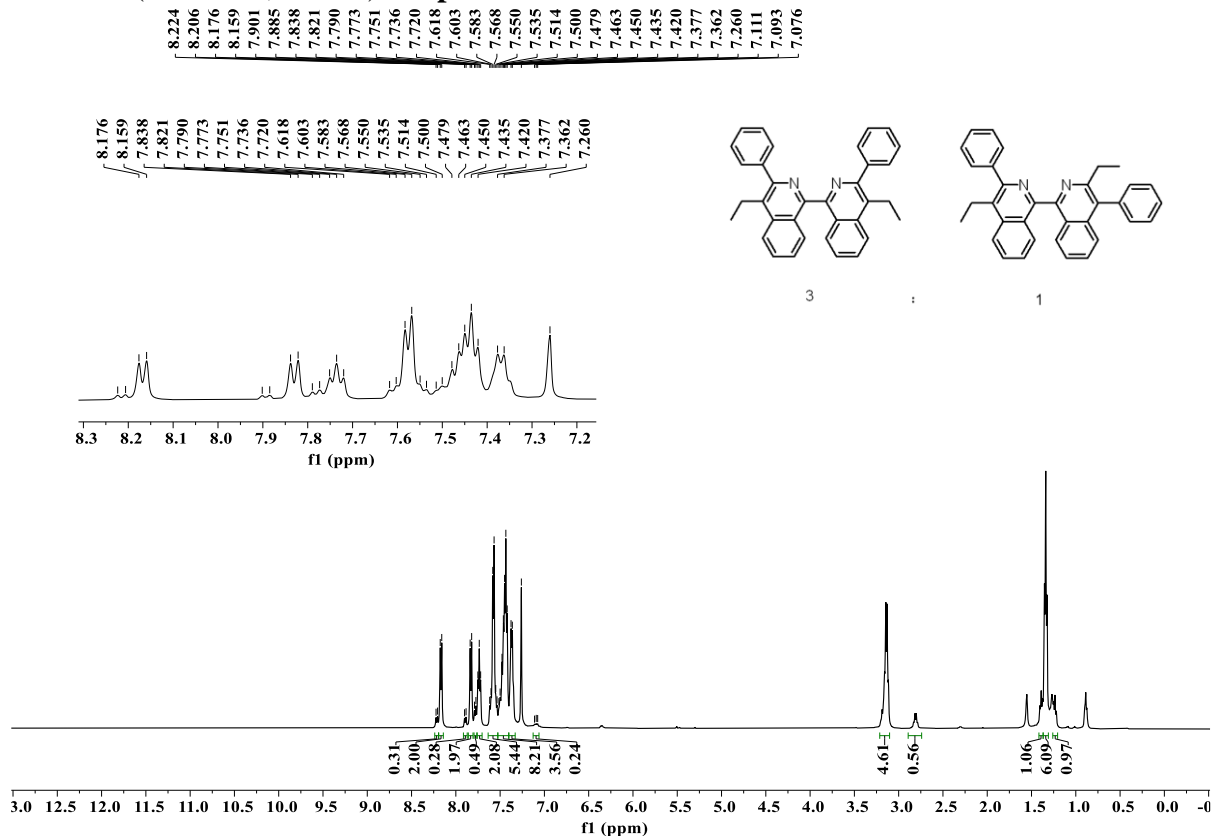

<sup>1</sup>H NMR (500 MHz, CDCl<sub>3</sub>) of **4ai**

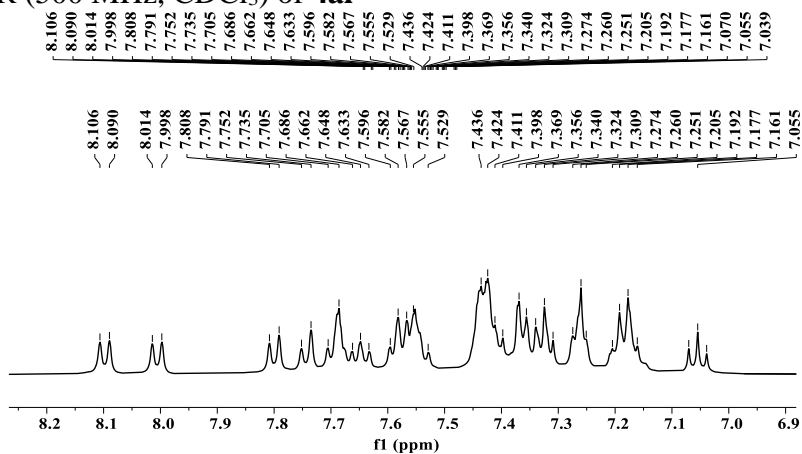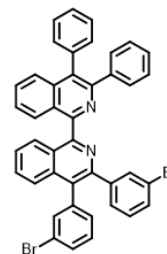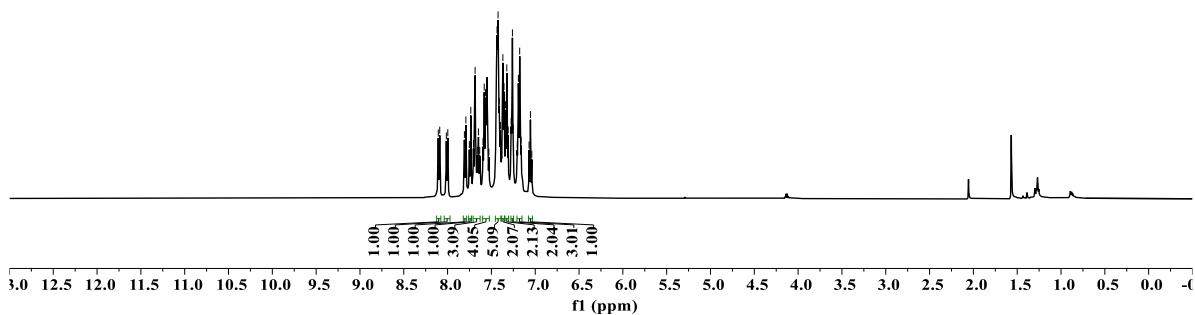

<sup>13</sup>C NMR (125 MHz, CDCl<sub>3</sub>) of **4ai**

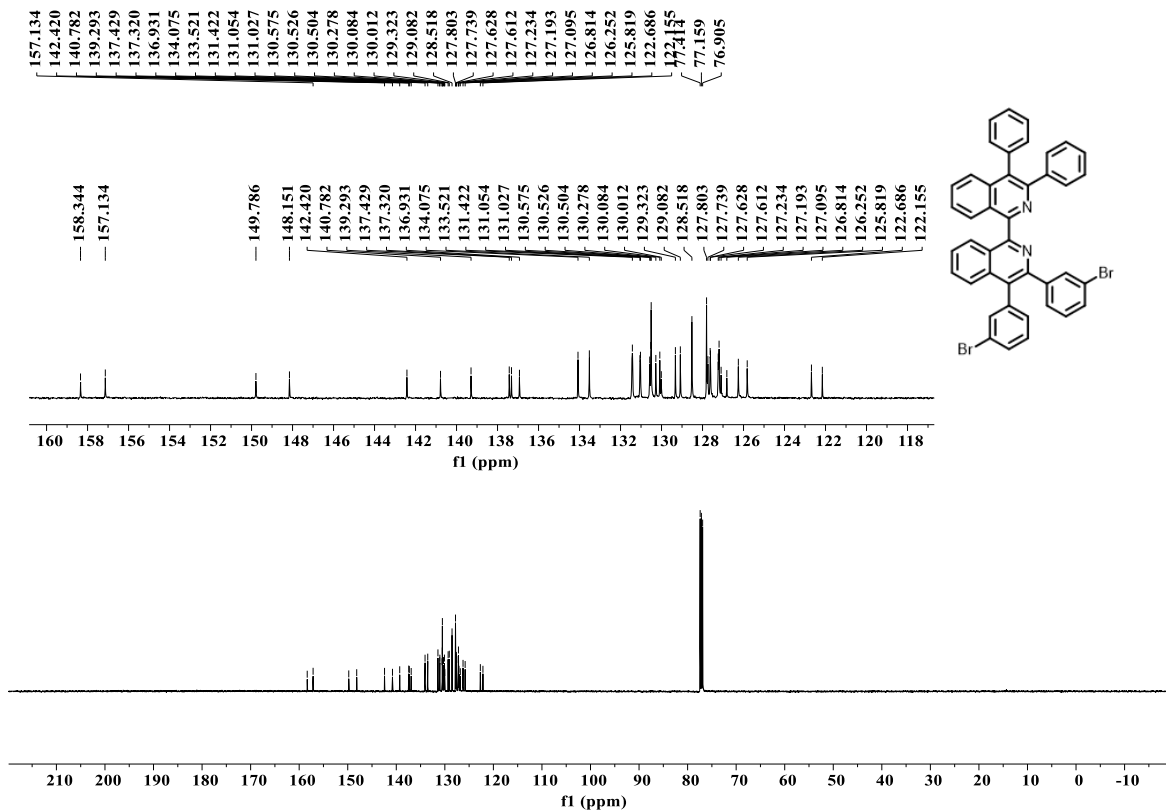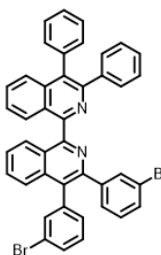

<sup>1</sup>H NMR (500 MHz, CDCl<sub>3</sub>) of **4aj**

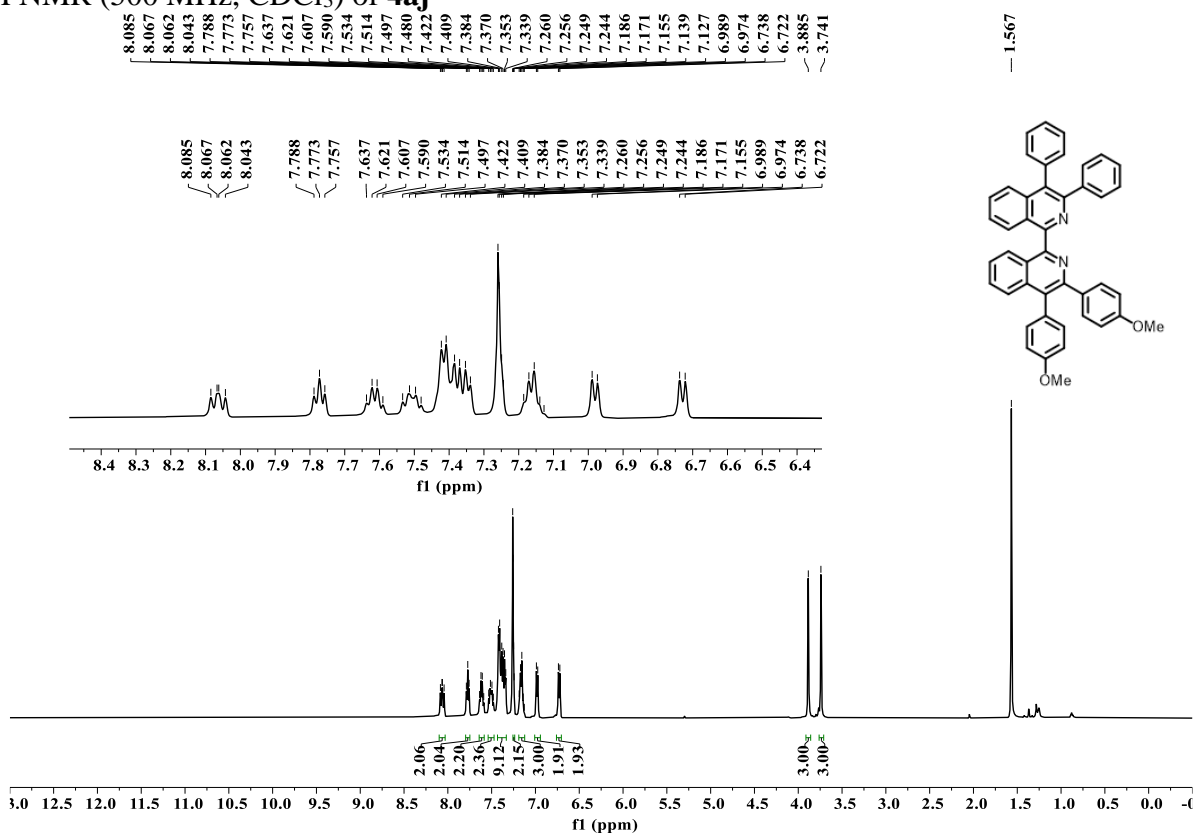

<sup>1</sup>H NMR (500 MHz, CDCl<sub>3</sub>) of **4al**

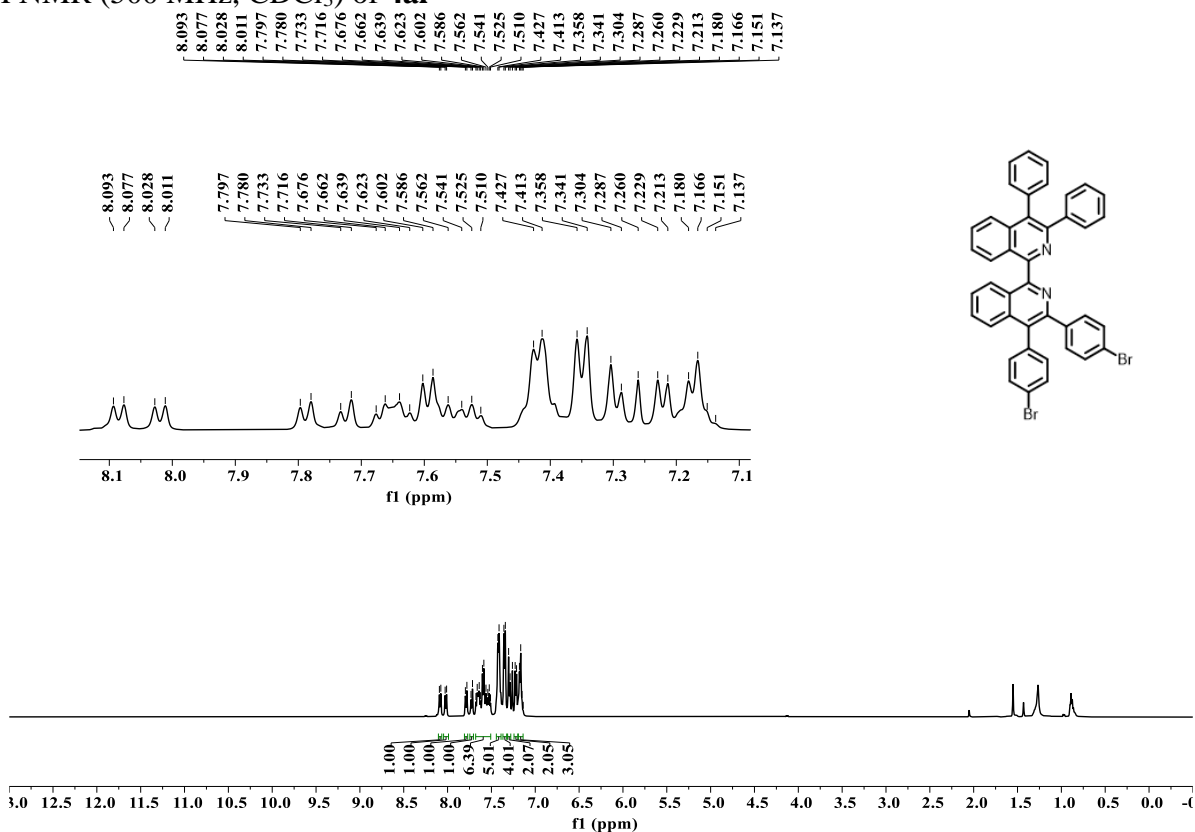

$^{13}\text{C}$  NMR (125 MHz,  $\text{CDCl}_3$ ) of **4al**

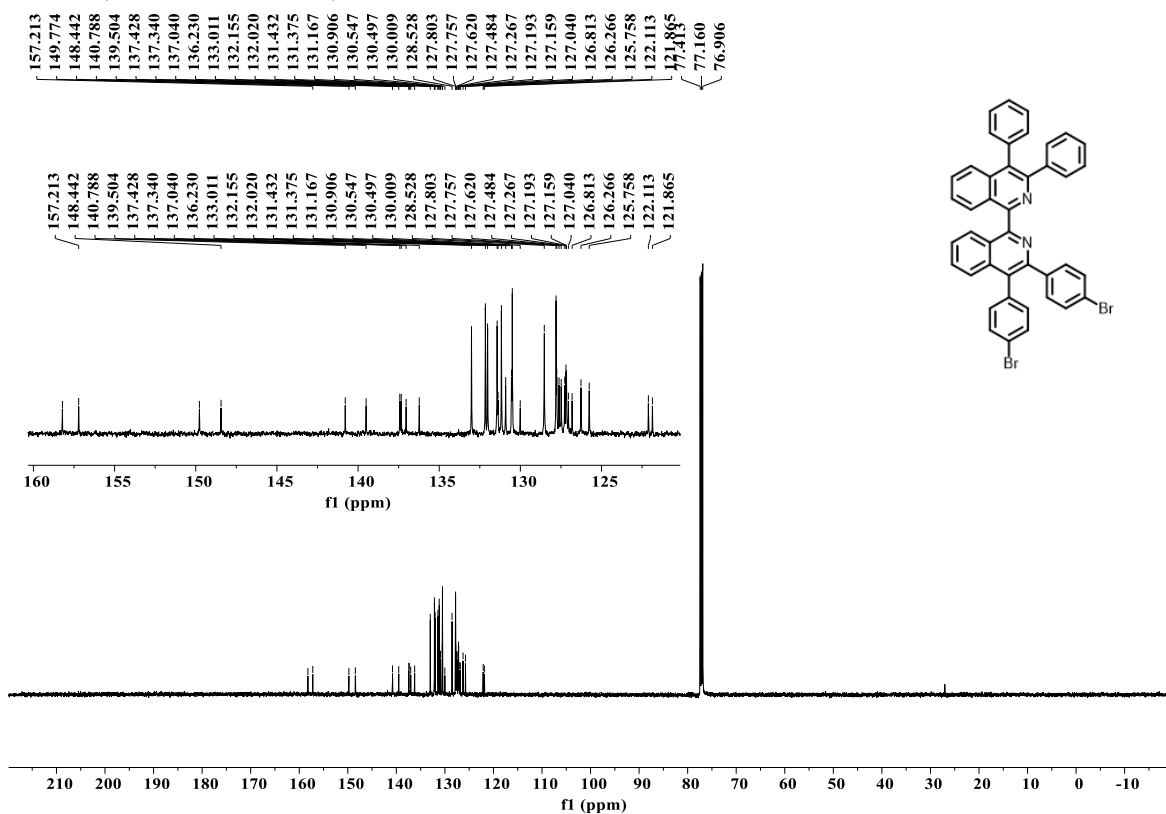

$^1\text{H}$  NMR (500 MHz,  $\text{CDCl}_3$ ) of **4ao**

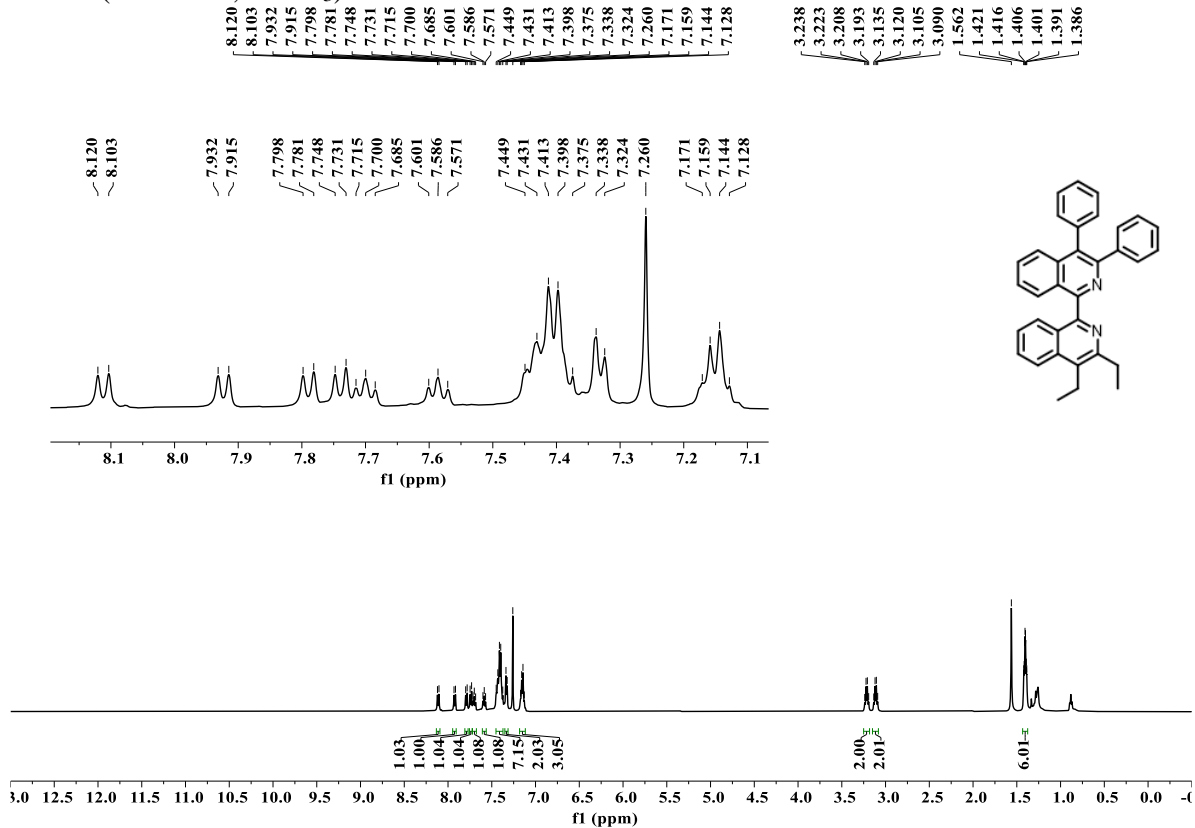

$^{13}\text{C}$  NMR (125 MHz,  $\text{CDCl}_3$ ) of **4ao**

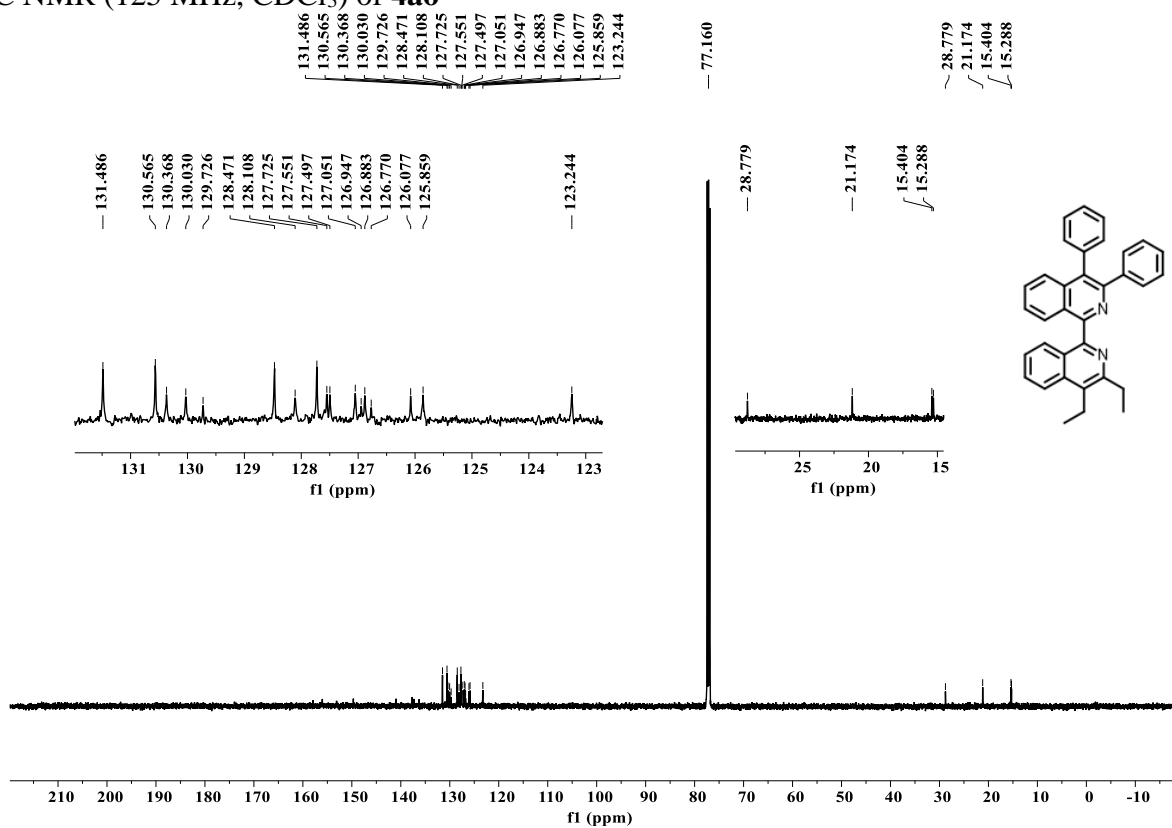

<sup>1</sup>H NMR (500 MHz, CDCl<sub>3</sub>) of **5a**

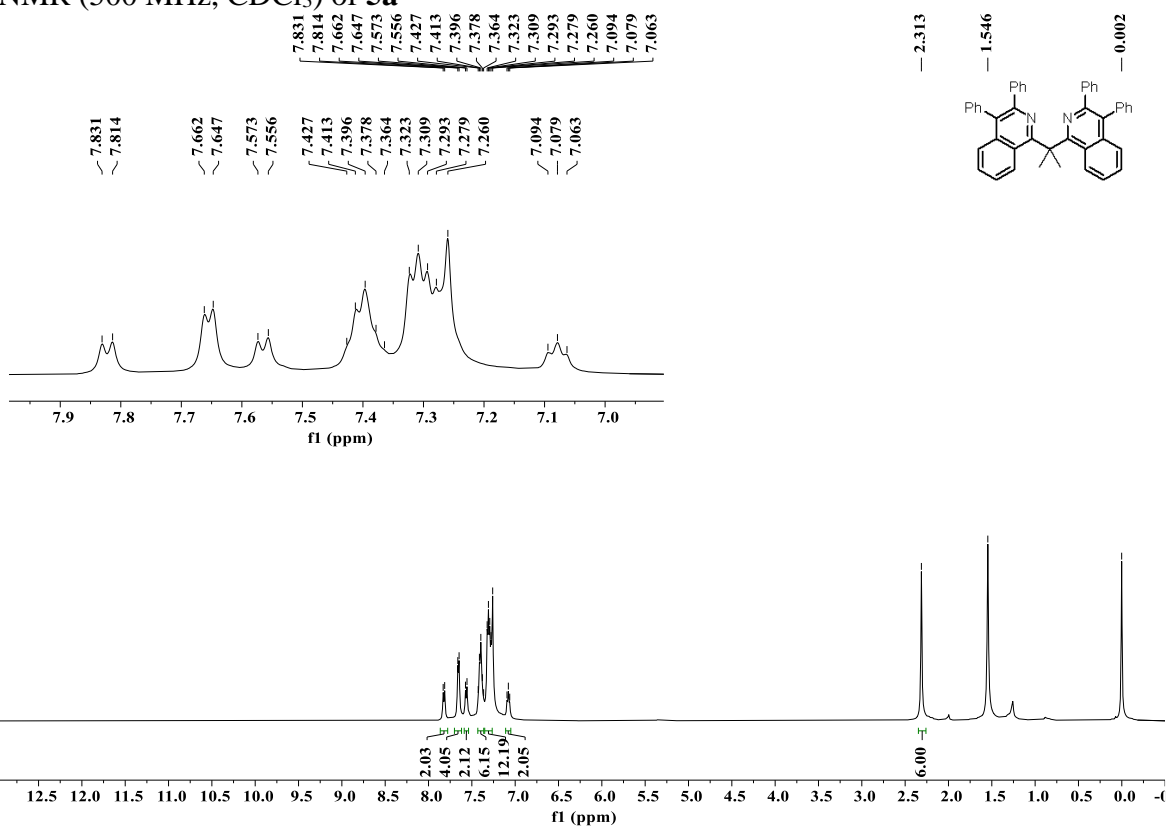

<sup>13</sup>C NMR (125 MHz, CDCl<sub>3</sub>) of **5a**

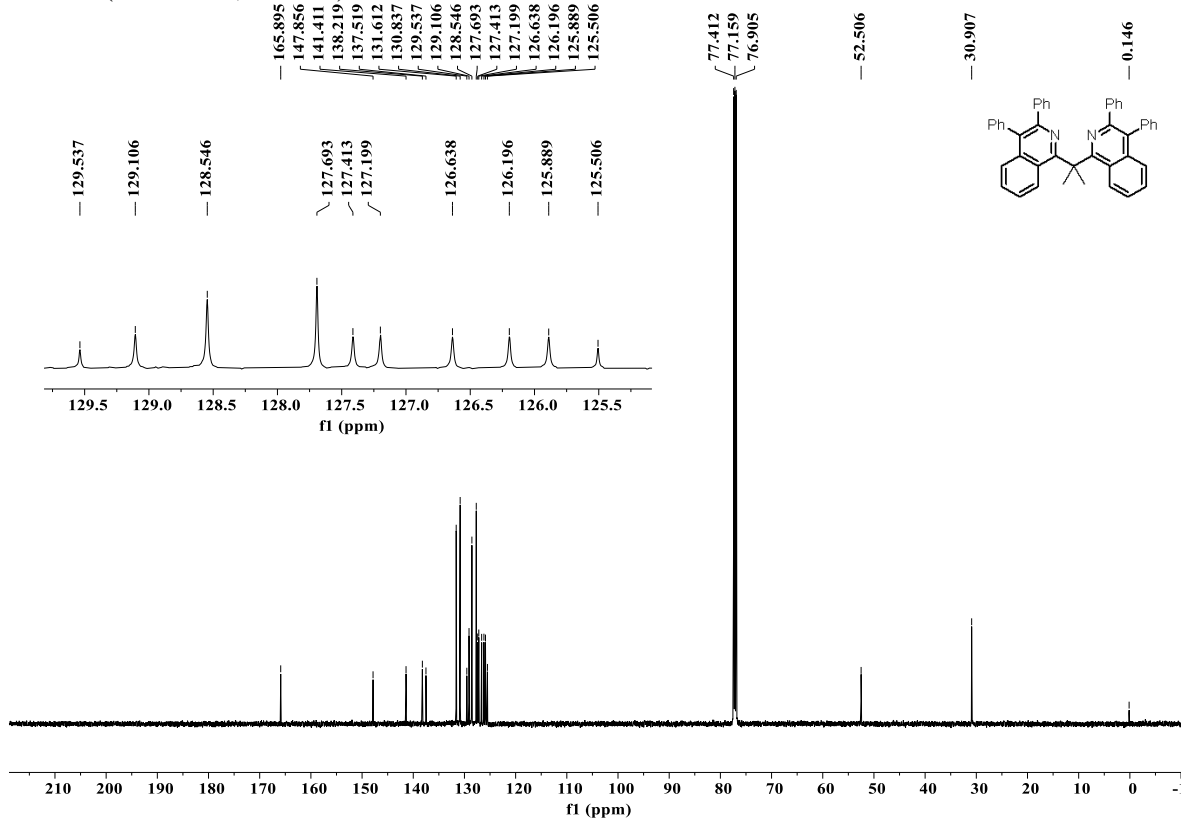



<sup>1</sup>H NMR (500 MHz, CDCl<sub>3</sub>) of **5b**

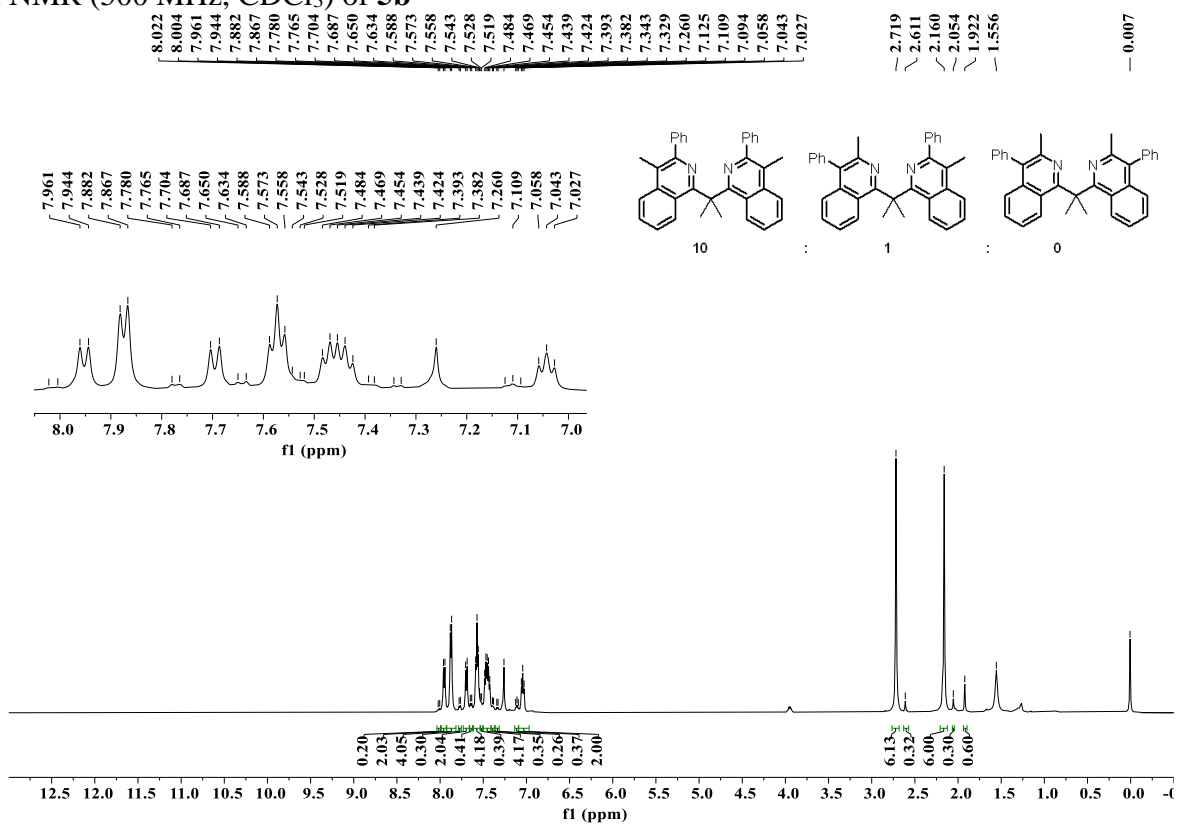

<sup>13</sup>C NMR (125 MHz, CDCl<sub>3</sub>) of **5b**

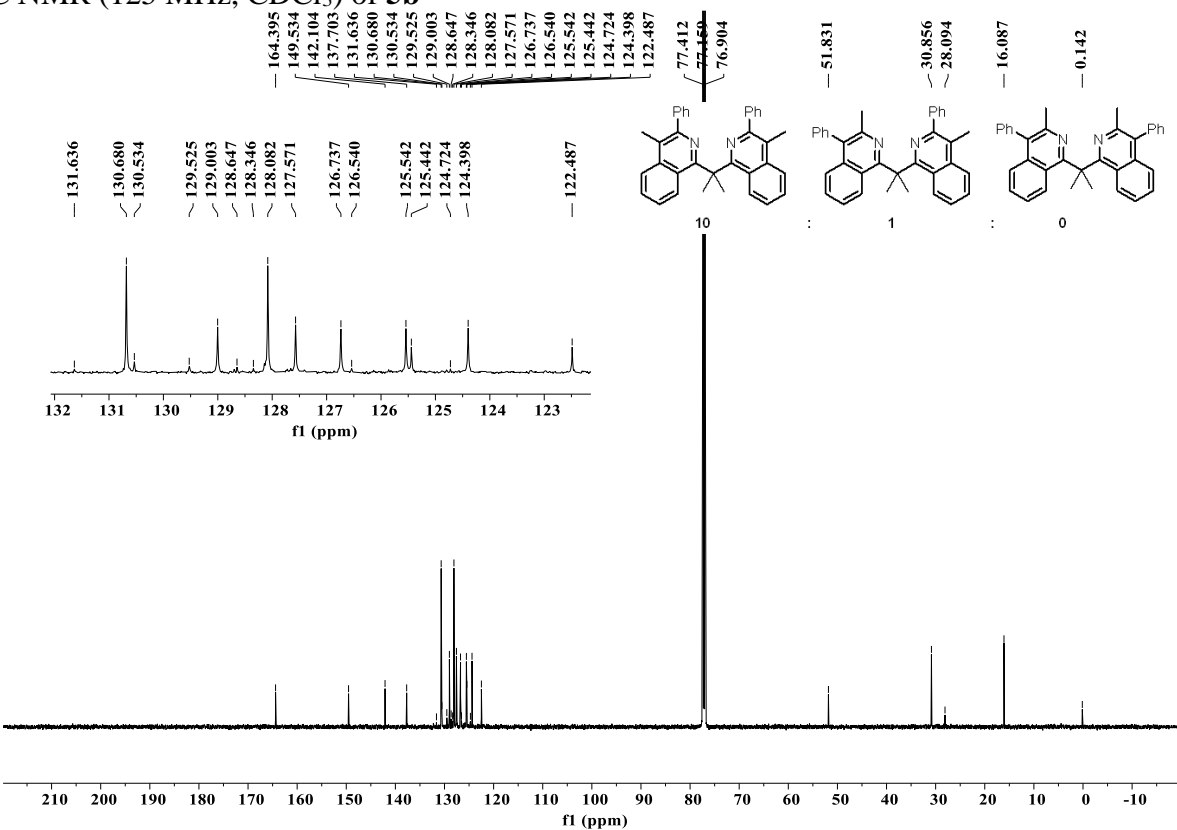

<sup>1</sup>H NMR (500 MHz, CDCl<sub>3</sub>) of **5c**

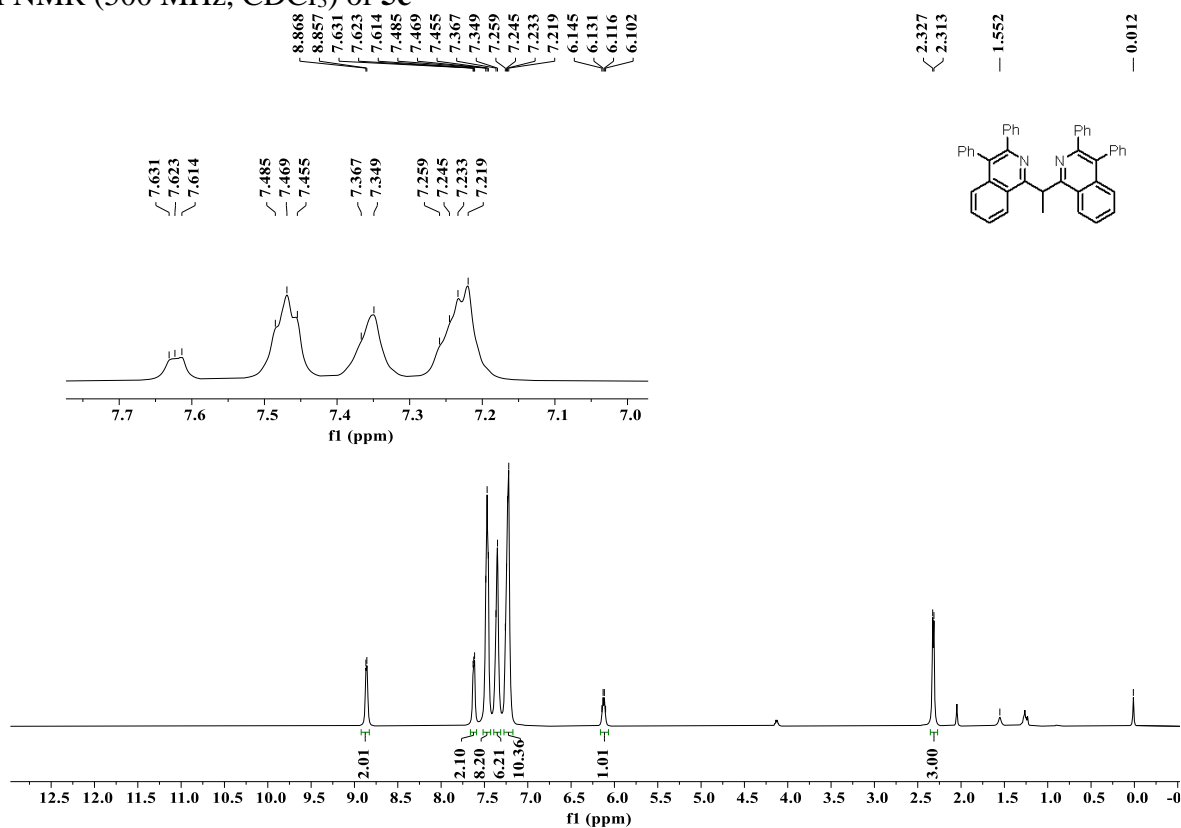

<sup>13</sup>C NMR (125 MHz, CDCl<sub>3</sub>) of **5c**

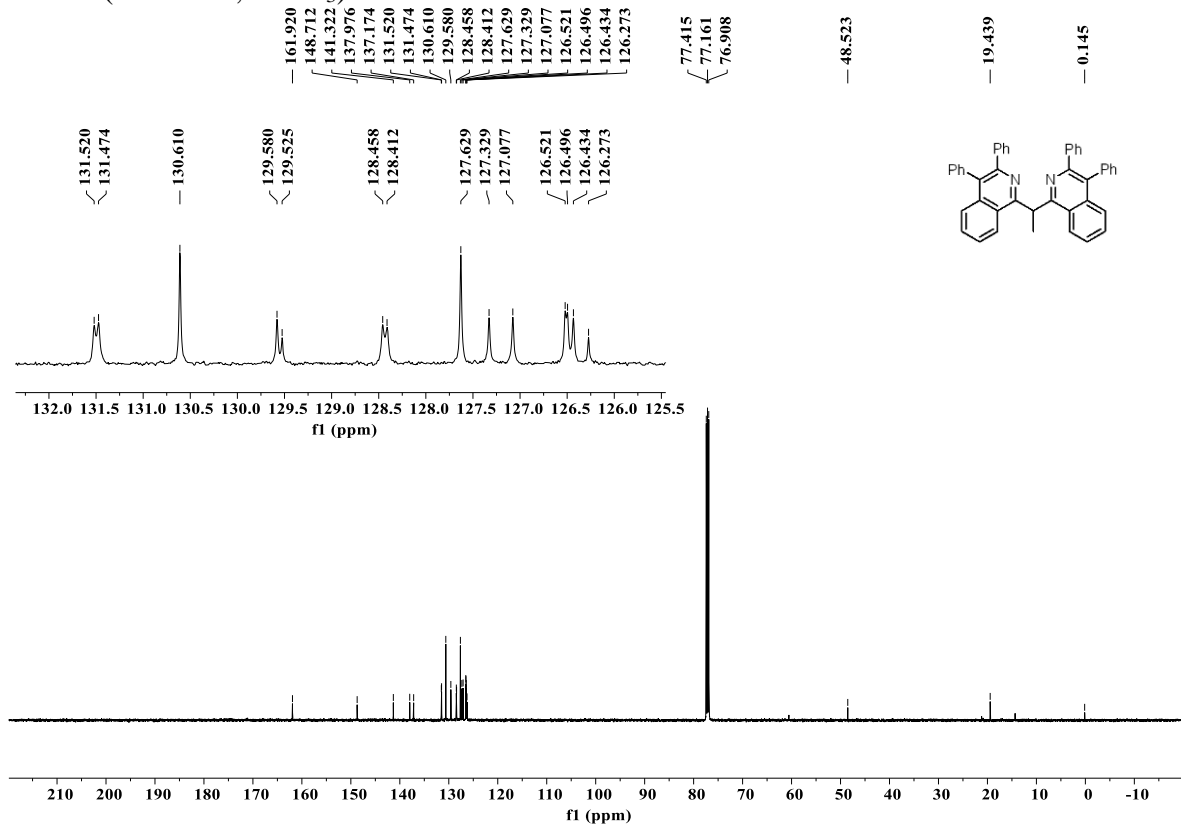

<sup>1</sup>H NMR (500 MHz, CDCl<sub>3</sub>) of **5d**

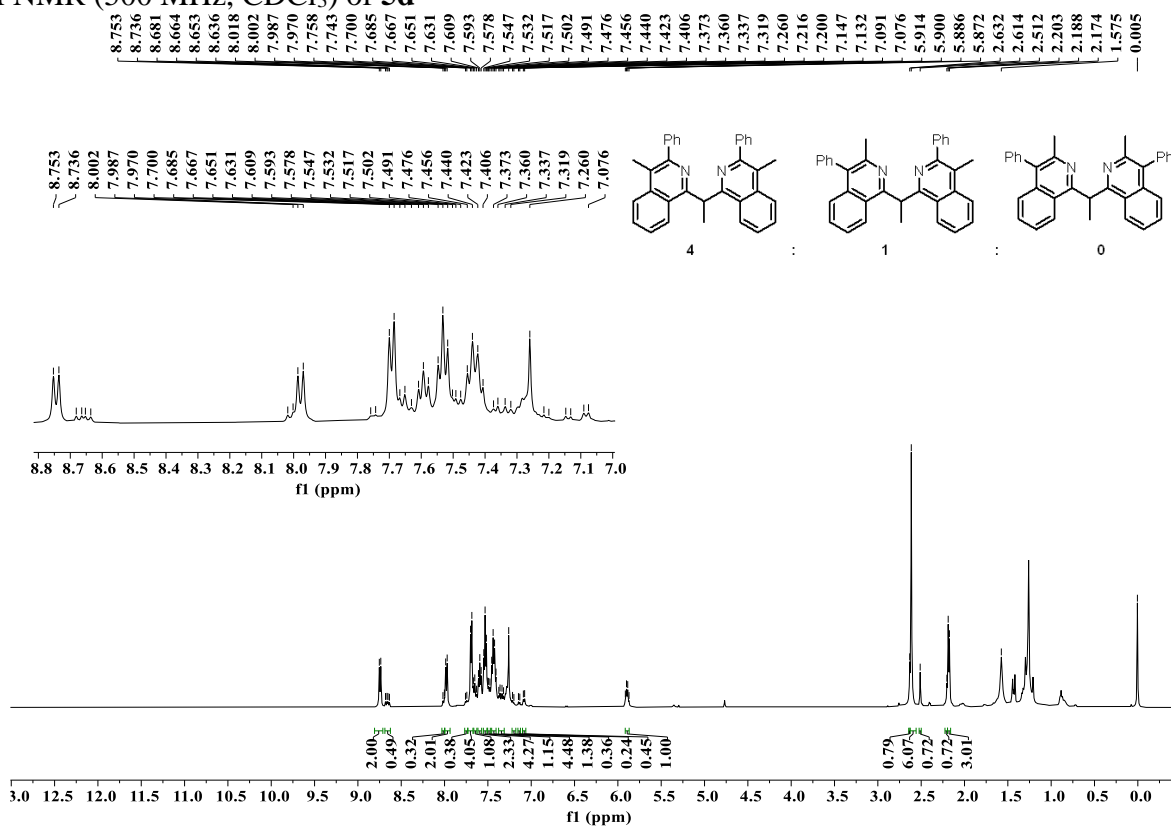

<sup>13</sup>C NMR (125 MHz, CDCl<sub>3</sub>) of **5d**

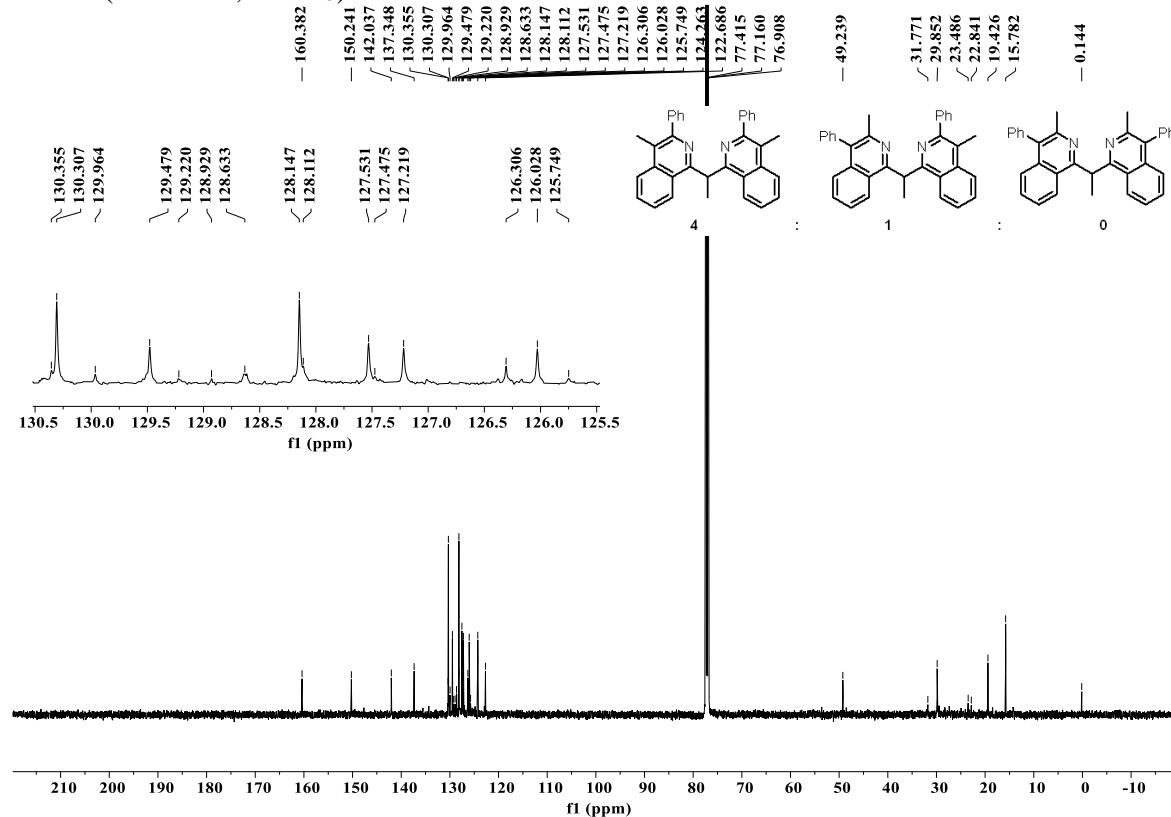

<sup>1</sup>H NMR (500 MHz, CDCl<sub>3</sub>) of **5e**

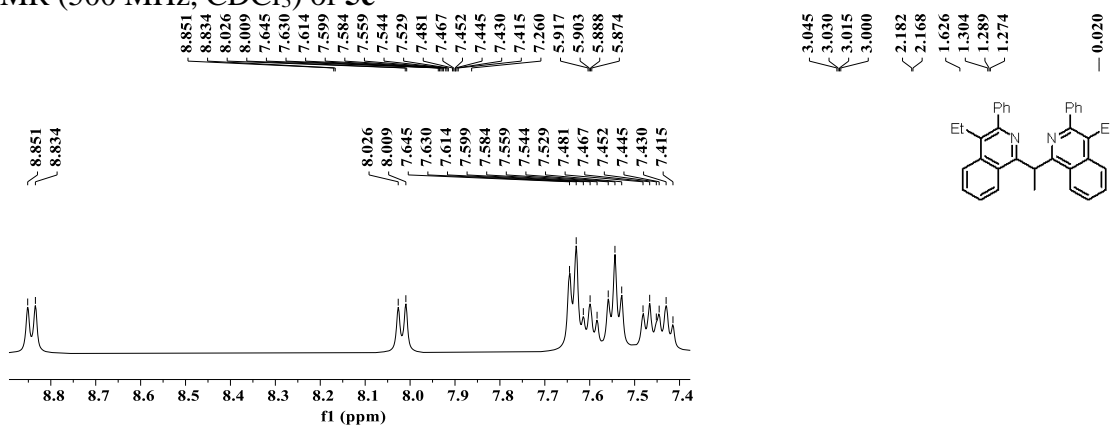

<sup>13</sup>C NMR (125 MHz, CDCl<sub>3</sub>) of **5e**

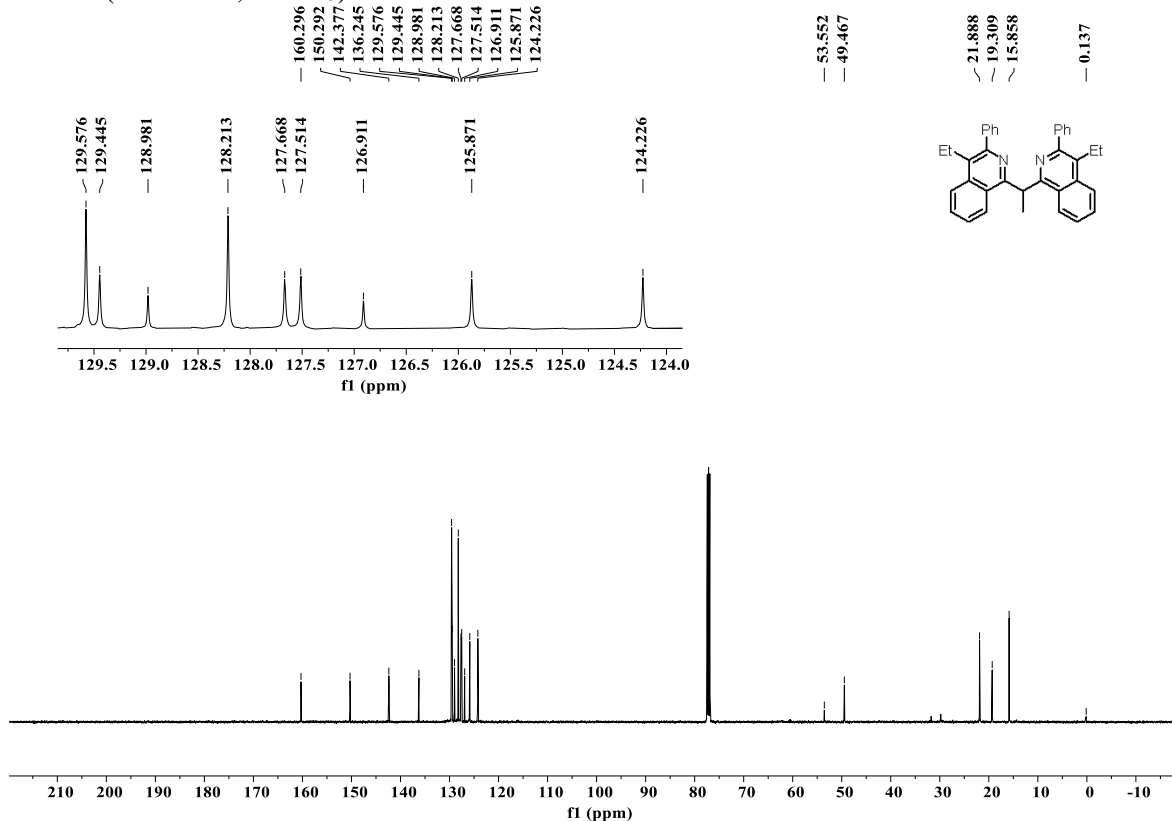

$^1\text{H}$ - $^1\text{H}$  Noesy of **5e**

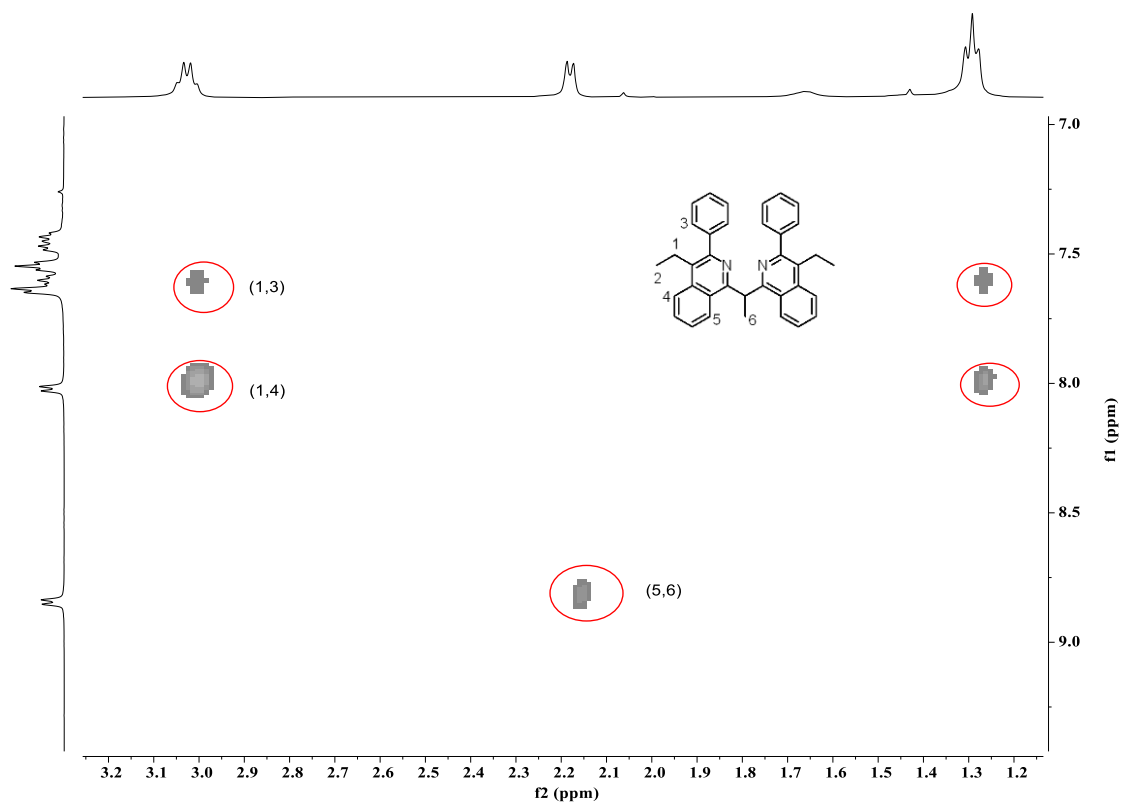

<sup>1</sup>H NMR (500 MHz, CDCl<sub>3</sub>) of **5e'**

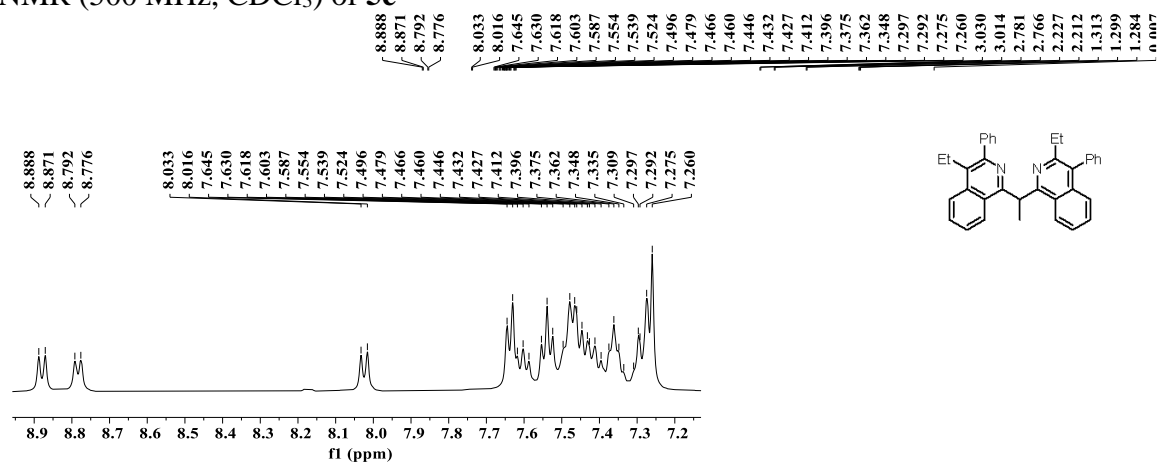

<sup>13</sup>C NMR (125 MHz, CDCl<sub>3</sub>) of **5e'**

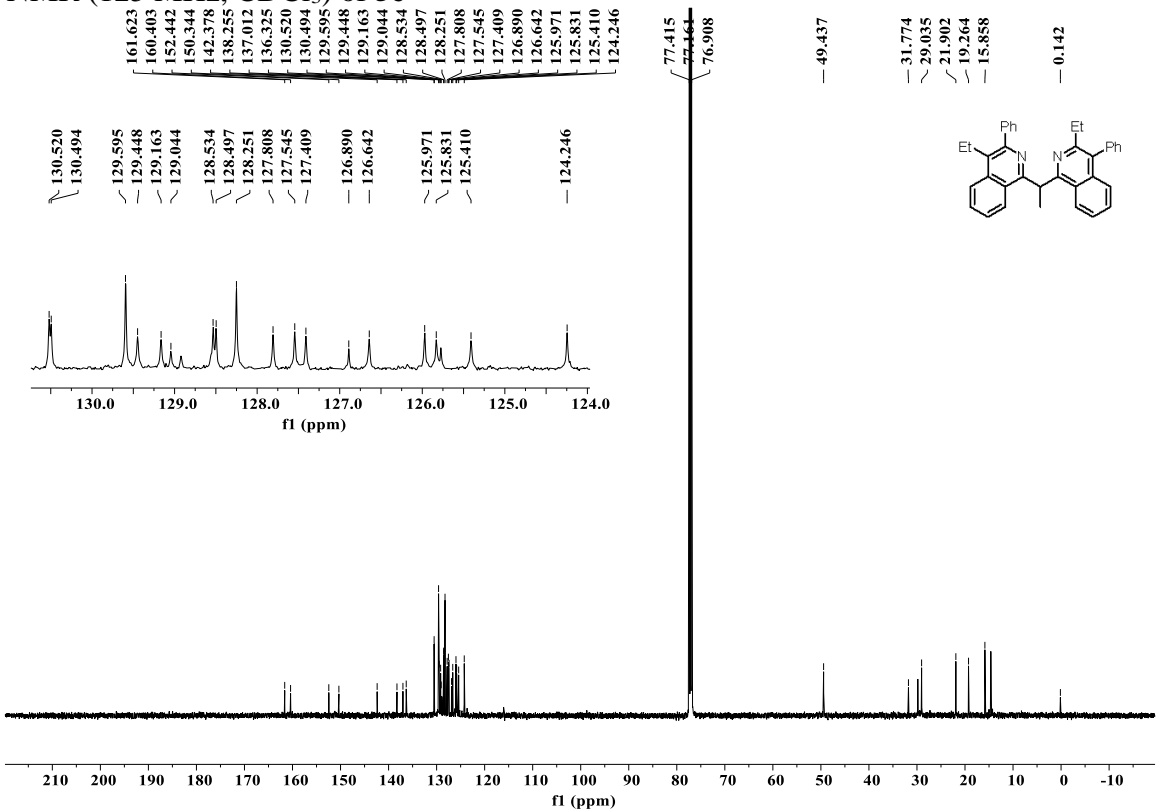

<sup>1</sup>H NMR (500 MHz, CDCl<sub>3</sub>) of **7a**

8.488, 8.471, 8.054, 7.960, 8.038, 7.946, 8.023, 7.929, 7.960, 7.816, 7.946, 7.929, 7.788, 7.816, 7.771, 7.805, 7.788, 7.668, 7.652, 7.771, 7.668, 7.635, 7.622, 7.652, 7.602, 7.635, 7.622, 7.424, 7.602, 7.410, 7.585, 7.352, 7.438, 7.303, 7.424, 7.410, 7.366, 7.260, 7.352, 7.303, 7.338, 7.140, 7.127, 7.288, 7.055, 7.271, 7.040, 7.260, 7.202, 7.202, 6.974, 7.140, 7.127, 7.127, 6.941, 7.055, 6.910, 7.040, 7.025, 6.828, 6.988, 6.974, 6.960, 6.941, 6.926, 6.910, 6.842, 6.828, 6.814, 6.797, 6.794

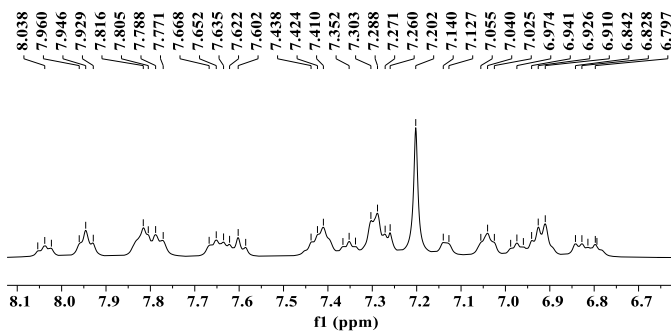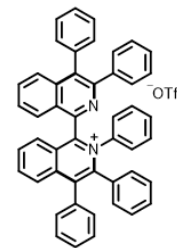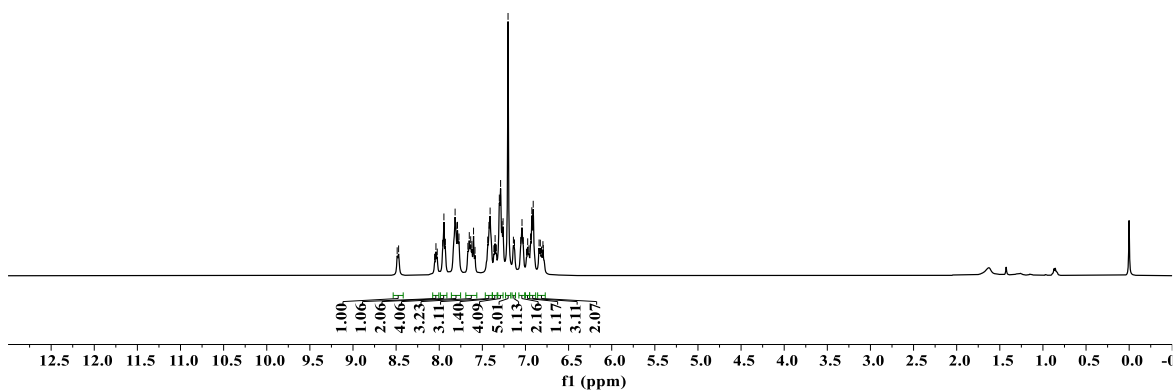

<sup>13</sup>C NMR (125 MHz, CDCl<sub>3</sub>) of **7a**

156.546, 149.871, 149.630, 146.684, 140.518, 140.140, 140.005, 139.866, 137.167, 136.093, 135.895, 133.775, 133.158, 133.059, 132.209, 129.690, 129.176, 128.981, 128.663, 128.491, 128.389, 131.132, 130.900, 130.369, 130.282, 130.091, 129.925, 129.690, 129.176, 128.981, 128.663, 128.491, 128.389, 128.061, 128.041, 127.855, 127.811, 127.774, 127.754, 127.679, 127.320, 127.032, 125.597, 77.160, 76.906

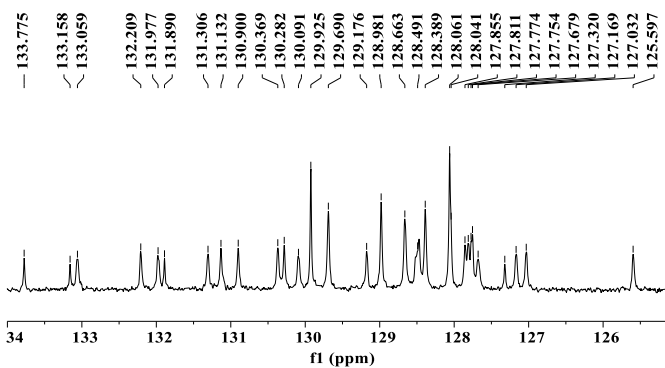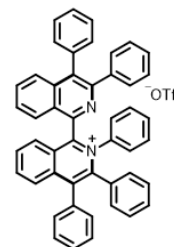

$^{19}\text{F}$  NMR (470 MHz,  $\text{CDCl}_3$ ) of **7a**

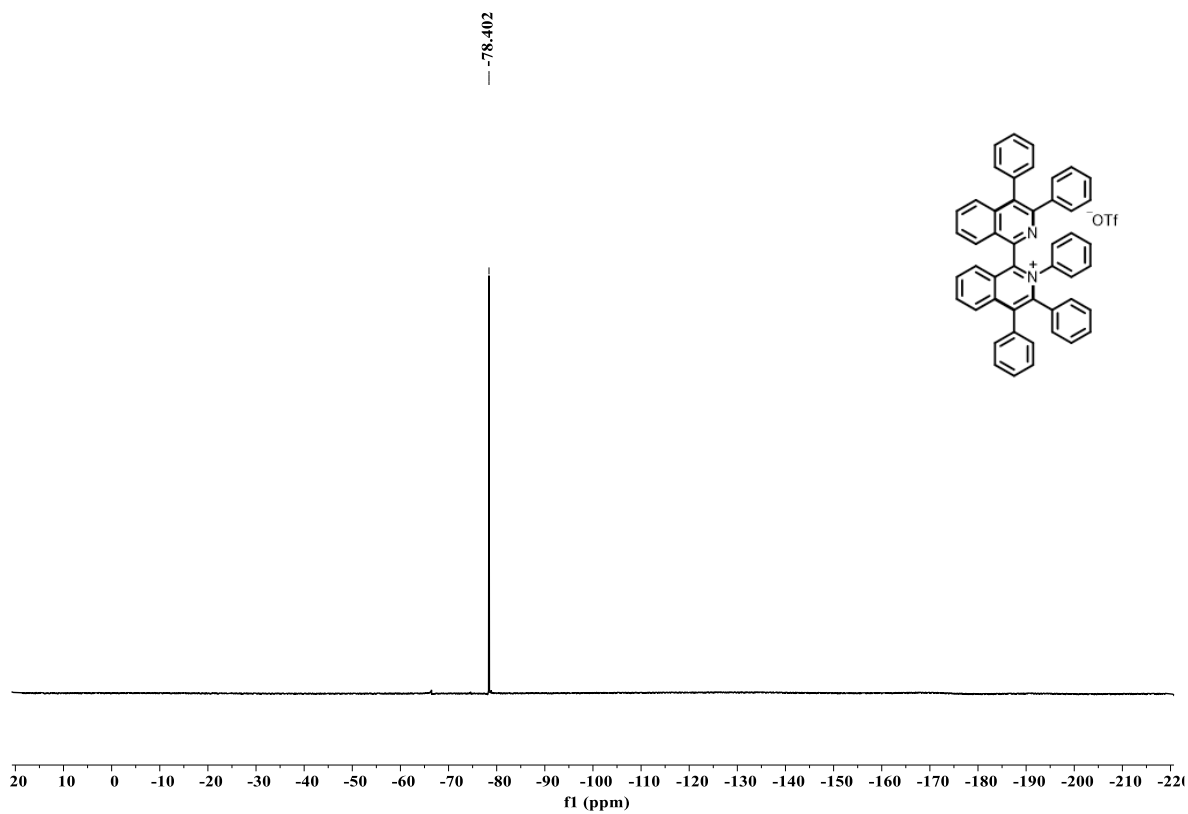



<sup>1</sup>H NMR (500 MHz, CDCl<sub>3</sub>) of **7b**

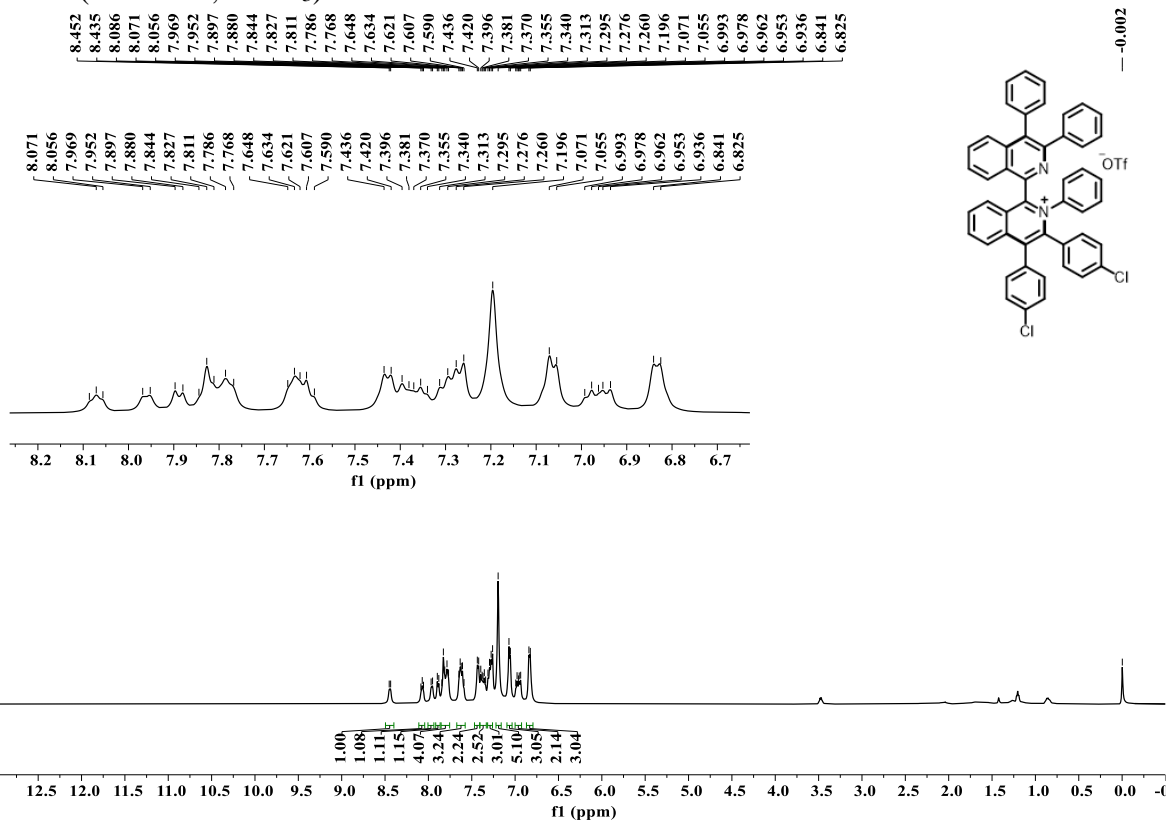

<sup>13</sup>C NMR (125 MHz, CDCl<sub>3</sub>) of **7b**

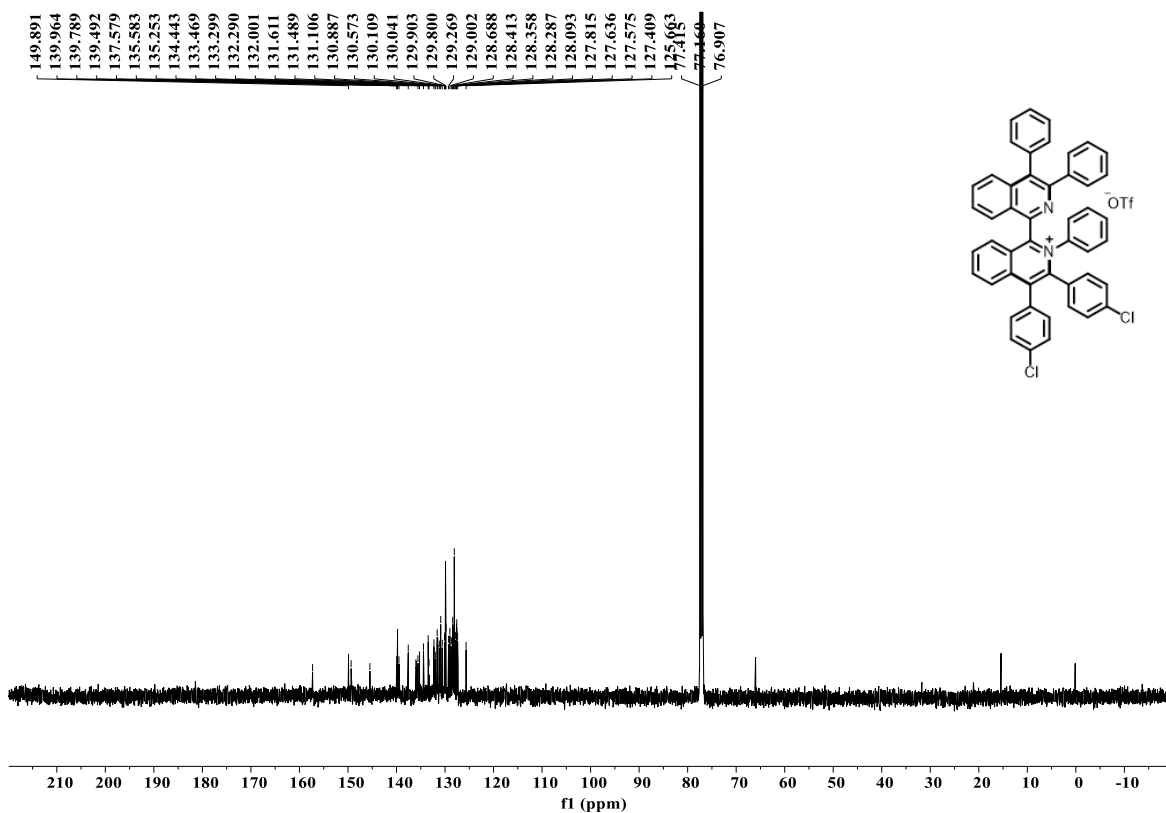

$^{19}\text{F}$  NMR (470 MHz,  $\text{CDCl}_3$ ) of **7b**

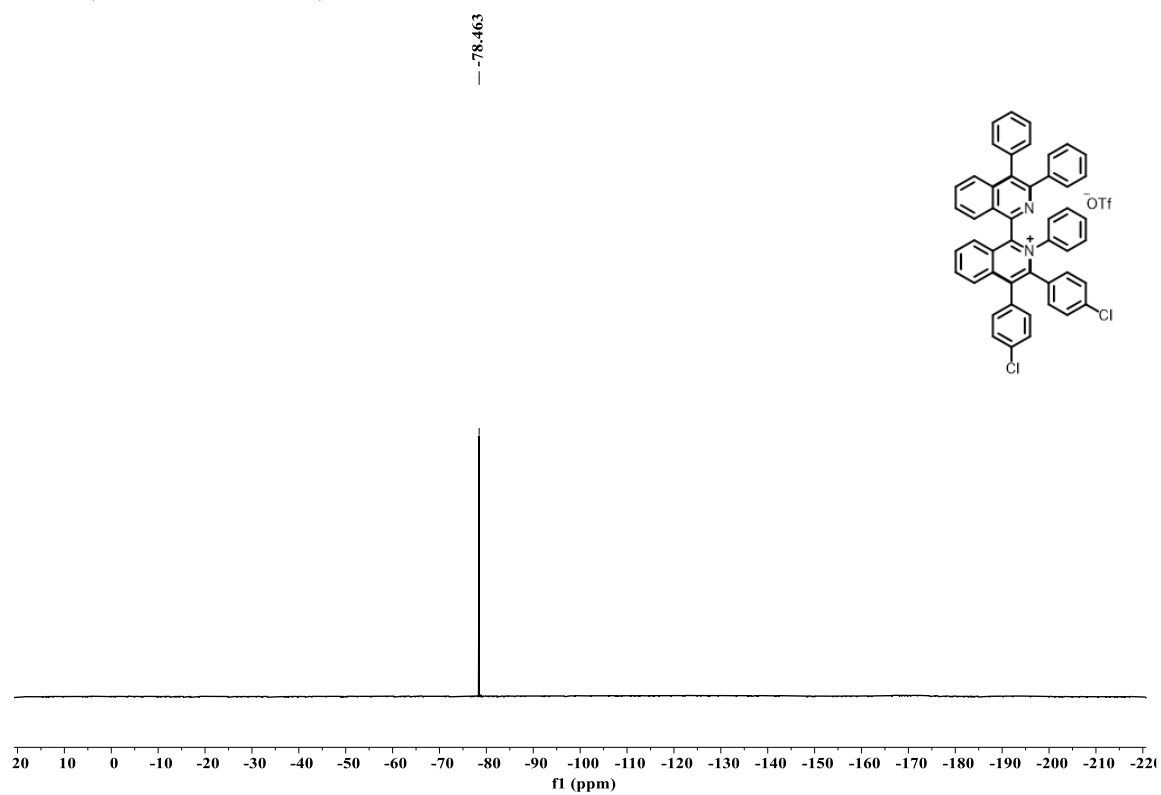



$^{19}\text{F}$  NMR (471 MHz,  $\text{CDCl}_3$ ) of **7c**

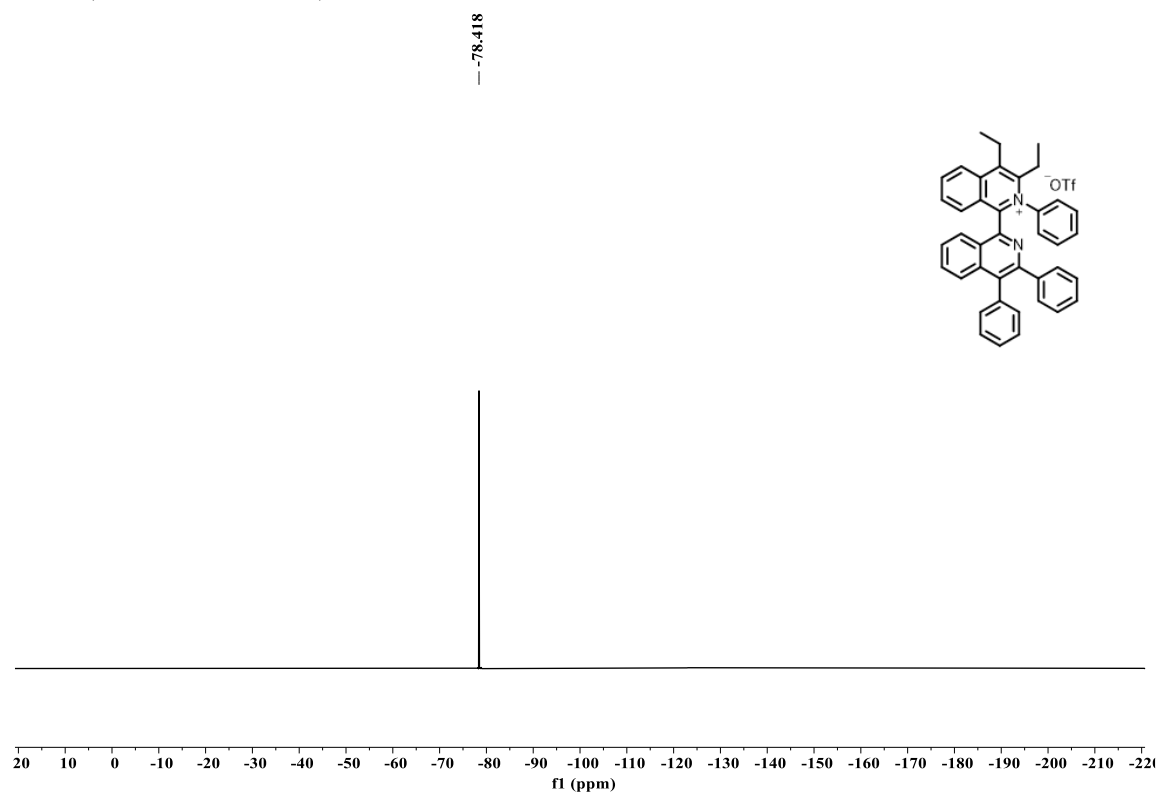

<sup>1</sup>H NMR (500 MHz, CDCl<sub>3</sub>) of **8**

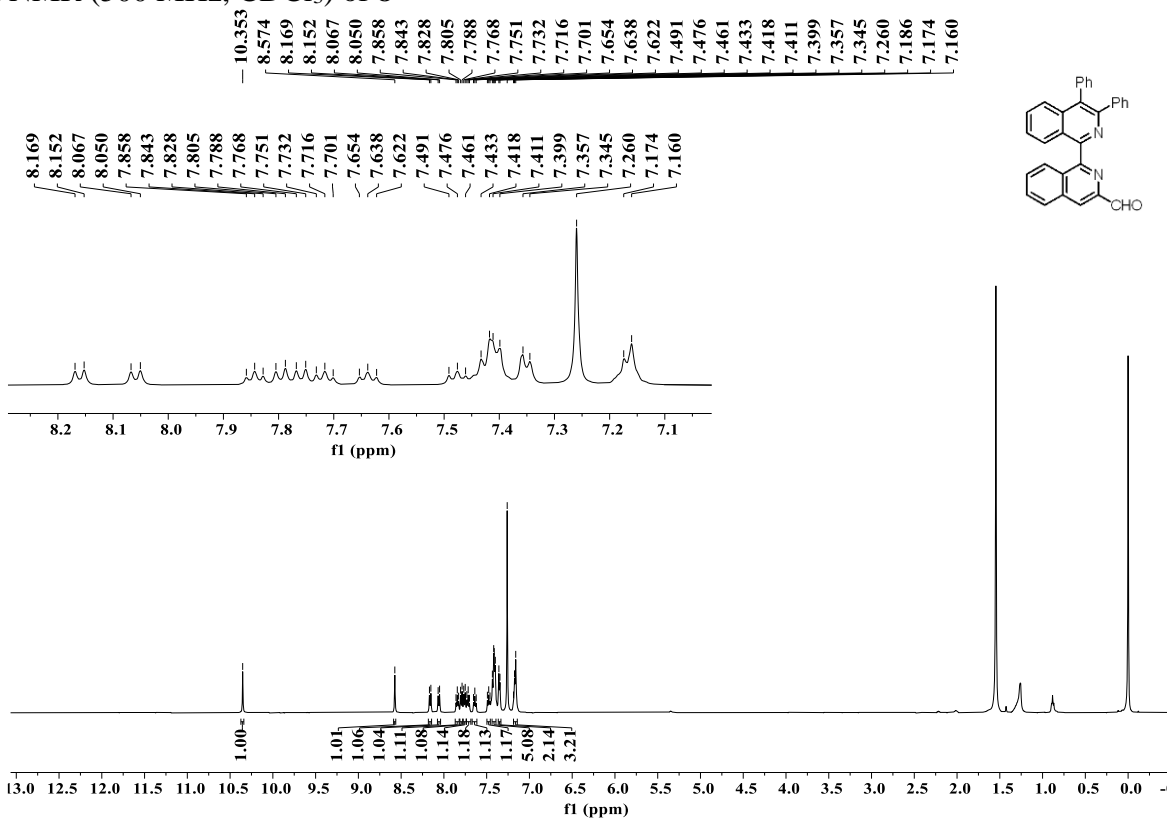

<sup>13</sup>C NMR (125 MHz, CDCl<sub>3</sub>) of **8**

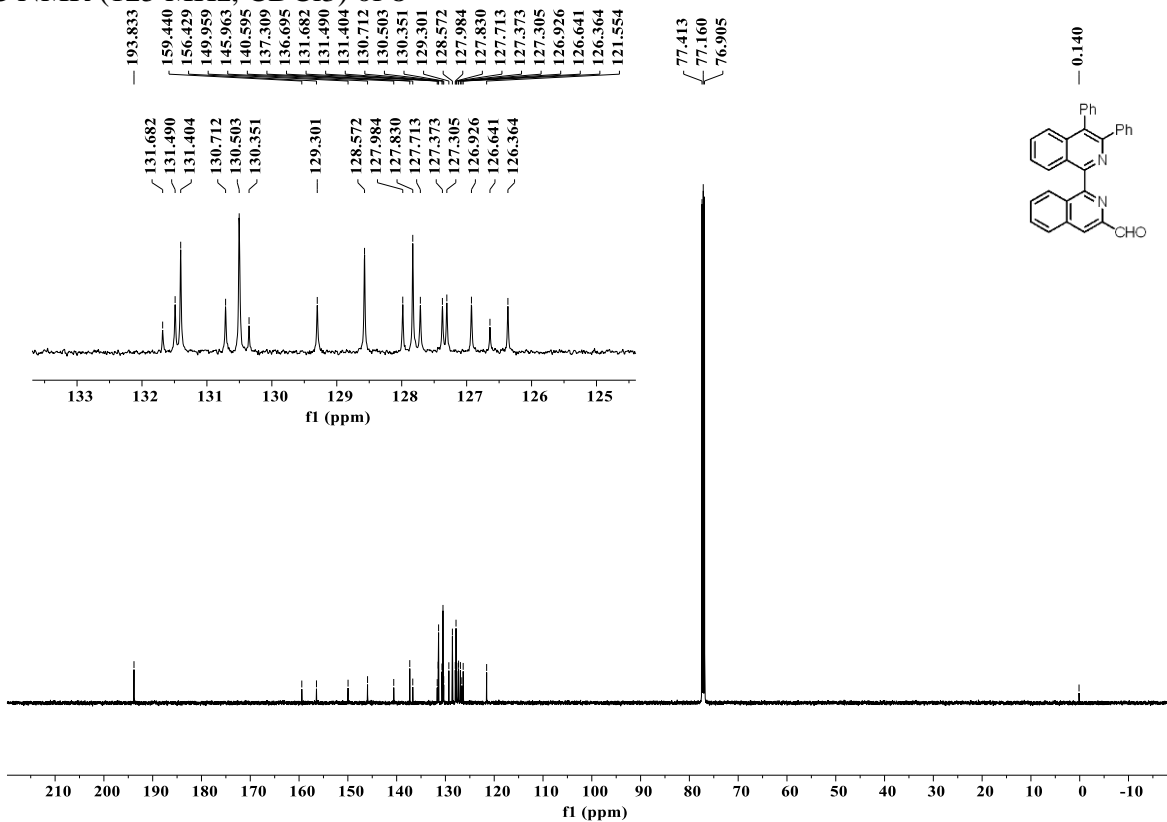

## 11 X-ray crystallographic data

General crystal growing conditions of **Int-C**: X-ray quality single crystal of **Int-C** was grown from the co-solvent of DCM and *n*-hexane (10:1, v/v) at room temperature by slow evaporation for 3 days.

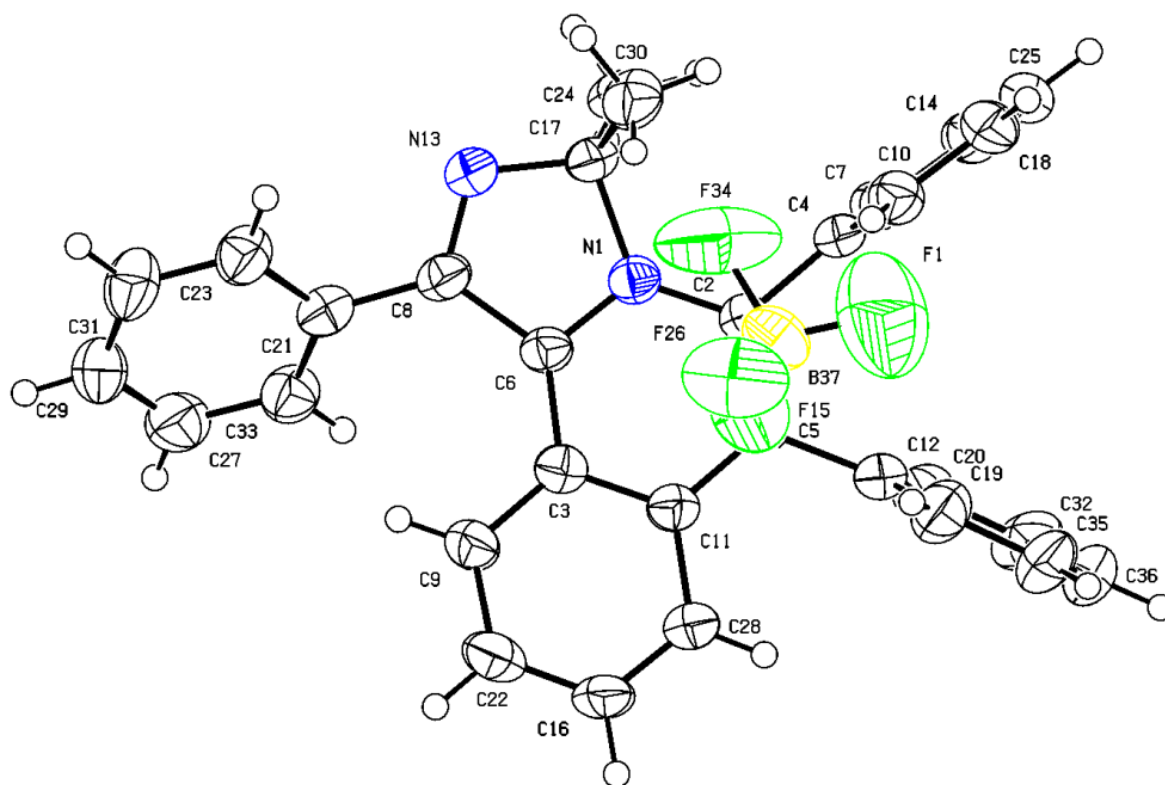

**Figure S18** The molecular structure of **Int-C** (CCDC 2266530). Thermal ellipsoids are shown at the 50% probability level.

**Table S10** Crystal data and structure refinement for *1\_tw*.

|                     |                                                                |
|---------------------|----------------------------------------------------------------|
| Identification code | 1_tw                                                           |
| Empirical formula   | C <sub>31</sub> H <sub>25</sub> BF <sub>4</sub> N <sub>2</sub> |
| Formula weight      | 512.34                                                         |
| Temperature/K       | 260.0                                                          |
| Crystal system      | monoclinic                                                     |
| Space group         | P2 <sub>1</sub> /n                                             |
| a/Å                 | 8.5802(9)                                                      |
| b/Å                 | 19.2499(19)                                                    |
| c/Å                 | 15.3566(17)                                                    |
| α/°                 | 90                                                             |
| β/°                 | 94.856(6)                                                      |

|                                               |                                                             |
|-----------------------------------------------|-------------------------------------------------------------|
| $\gamma/^\circ$                               | 90                                                          |
| Volume/ $\text{\AA}^3$                        | 2527.3(5)                                                   |
| Z                                             | 4                                                           |
| $\rho_{\text{calc}}/\text{g/cm}^3$            | 1.347                                                       |
| $\mu/\text{mm}^{-1}$                          | 0.523                                                       |
| F(000)                                        | 1064.0                                                      |
| Crystal size/ $\text{mm}^3$                   | $0.03 \times 0.02 \times 0.01$                              |
| Radiation                                     | Ga $K\alpha$ ( $\lambda = 1.34139$ )                        |
| 2 $\Theta$ range for data collection/         | 6.42 to 114.274                                             |
| Index ranges                                  | $-10 \leq h \leq 10, -24 \leq k \leq 24, -2 \leq l \leq 19$ |
| Reflections collected                         | 5143                                                        |
| Independent reflections                       | 5143 [ $R_{\text{int}} = ?$ , $R_{\text{sigma}} = 0.0630$ ] |
| Data/restraints/parameters                    | 5143/0/347                                                  |
| Goodness-of-fit on $F^2$                      | 1.116                                                       |
| Final R indexes [ $I \geq 2\sigma(I)$ ]       | $R_1 = 0.1200, wR_2 = 0.3367$                               |
| Final R indexes [all data]                    | $R_1 = 0.1623, wR_2 = 0.3513$                               |
| Largest diff. peak/hole / $e \text{\AA}^{-3}$ | 0.44/-0.44                                                  |

**Table S11 Fractional Atomic Coordinates ( $\times 10^4$ ) and Equivalent Isotropic Displacement Parameters ( $\text{\AA}^2 \times 10^3$ ) for 1\_tw.  $U_{\text{eq}}$  is defined as 1/3 of of the trace of the orthogonalised  $U_{ij}$  tensor.**

| Atom | x        | y        | z        | U(eq)    |
|------|----------|----------|----------|----------|
| N1   | 2734(7)  | 1386(3)  | 8347(4)  | 30.0(13) |
| C2   | 2870(8)  | 1071(3)  | 7545(4)  | 30.7(15) |
| C3   | 2948(8)  | 299(4)   | 9122(4)  | 31.1(15) |
| C4   | 2845(5)  | 1487(2)  | 6725(2)  | 32.1(15) |
| C7   | 1424(5)  | 1605(3)  | 6244(3)  | 38.3(17) |
| C14  | 1386(5)  | 1953(3)  | 5449(3)  | 47(2)    |
| C25  | 2769(7)  | 2183(3)  | 5135(3)  | 51(2)    |
| C18  | 4190(5)  | 2064(3)  | 5617(3)  | 49(2)    |
| C10  | 4228(5)  | 1716(3)  | 6411(3)  | 39.5(18) |
| C5   | 3017(9)  | 364(4)   | 7528(5)  | 33.0(16) |
| C6   | 2714(8)  | 1023(3)  | 9093(5)  | 30.9(15) |
| C8   | 2446(9)  | 1555(4)  | 9779(5)  | 35.8(17) |
| C9   | 3090(10) | -100(4)  | 9901(5)  | 41.7(19) |
| C11  | 3125(9)  | -37(4)   | 8307(5)  | 34.8(16) |
| N13  | 2471(8)  | 2172(3)  | 9474(4)  | 38.6(15) |
| F15  | 6810(70) | 730(30)  | 7980(40) | 96(16)   |
| C16  | 3437(11) | -1131(4) | 9068(6)  | 48(2)    |
| C17  | 2647(10) | 2157(4)  | 8546(5)  | 37.4(17) |

**Table S11 Fractional Atomic Coordinates ( $\times 10^4$ ) and Equivalent Isotropic Displacement Parameters ( $\text{\AA}^2 \times 10^3$ ) for 1\_tw.  $U_{eq}$  is defined as 1/3 of the trace of the orthogonalised  $U_{IJ}$  tensor.**

| Atom | x        | y        | z        | U(eq)    |
|------|----------|----------|----------|----------|
| C22  | 3310(10) | -798(4)  | 9868(5)  | 47(2)    |
| C24  | 1195(11) | 2491(4)  | 8098(6)  | 49(2)    |
| F26  | 9150(60) | 940(30)  | 8500(30) | 98(13)   |
| C28  | 3331(11) | -766(4)  | 8309(5)  | 46(2)    |
| C30  | 4133(10) | 2524(4)  | 8348(5)  | 47(2)    |
| C33  | 1099(6)  | 918(3)   | 10919(3) | 44.8(19) |
| C21  | 2129(6)  | 1434(3)  | 10698(2) | 38.0(17) |
| C23  | 2865(6)  | 1853(2)  | 11346(3) | 46(2)    |
| C31  | 2571(7)  | 1757(3)  | 12214(3) | 57(2)    |
| C29  | 1541(7)  | 1241(3)  | 12434(3) | 55(2)    |
| C27  | 805(6)   | 822(3)   | 11787(3) | 54(2)    |
| F34  | 7700(70) | 1651(19) | 7720(90) | 210(40)  |
| C36  | 3089(9)  | -791(3)  | 5157(3)  | 77(4)    |
| C32  | 1678(7)  | -563(3)  | 5437(4)  | 61(3)    |
| C20  | 1666(5)  | -175(3)  | 6200(4)  | 50(2)    |
| C12  | 3065(6)  | -14(2)   | 6681(3)  | 37.8(17) |
| C19  | 4476(5)  | -242(3)  | 6400(4)  | 54(2)    |
| C35  | 4488(7)  | -631(3)  | 5638(4)  | 65(3)    |
| B37  | 7989(14) | 1048(6)  | 7909(8)  | 58(3)    |
| F1   | 8030(50) | 1260(20) | 7055(18) | 93(12)   |
| F15A | 6800(40) | 548(17)  | 8082(17) | 61(5)    |
| F26A | 9400(40) | 847(12)  | 8360(30) | 114(12)  |
| F1A  | 8440(40) | 830(40)  | 7129(18) | 177(18)  |
| F34A | 7570(30) | 1677(10) | 8300(13) | 87(7)    |

**Table S12 Anisotropic Displacement Parameters ( $\text{\AA}^2 \times 10^3$ ) for 1\_tw. The Anisotropic displacement factor exponent takes the form:  $-2\pi^2[h^2a^{*2}U_{11}+2hka^*b^*U_{12}+\dots]$ .**

| Atom | U <sub>11</sub> | U <sub>22</sub> | U <sub>33</sub> | U <sub>23</sub> | U <sub>13</sub> | U <sub>12</sub> |
|------|-----------------|-----------------|-----------------|-----------------|-----------------|-----------------|
| N1   | 27(3)           | 29(3)           | 33(3)           | -1(2)           | 1(2)            | 3(2)            |
| C2   | 33(4)           | 29(3)           | 30(3)           | -2(3)           | 3(3)            | 4(3)            |
| C3   | 27(4)           | 32(3)           | 34(4)           | 3(3)            | 0(3)            | 2(3)            |
| C4   | 40(4)           | 26(3)           | 31(4)           | 0(3)            | 4(3)            | 2(3)            |
| C7   | 40(4)           | 40(4)           | 34(4)           | 4(3)            | -5(3)           | 1(3)            |
| C14  | 58(6)           | 45(5)           | 35(4)           | 7(3)            | -6(4)           | 3(4)            |
| C25  | 78(7)           | 39(4)           | 38(4)           | 7(3)            | 11(5)           | 1(4)            |
| C18  | 59(6)           | 42(4)           | 48(5)           | 5(4)            | 15(4)           | -5(4)           |
| C10  | 39(4)           | 40(4)           | 39(4)           | 1(3)            | 4(3)            | -3(3)           |
| C5   | 36(4)           | 29(3)           | 35(4)           | -1(3)           | 8(3)            | 1(3)            |



**Table S12 Anisotropic Displacement Parameters ( $\text{\AA}^2 \times 10^3$ ) for 1\_tw. The Anisotropic displacement factor exponent takes the form:  $-2\pi^2[h^2a^*U_{11}+2hka^*b^*U_{12}+\dots]$ .**

| Atom | U <sub>11</sub> | U <sub>22</sub> | U <sub>33</sub> | U <sub>23</sub> | U <sub>13</sub> | U <sub>12</sub> |
|------|-----------------|-----------------|-----------------|-----------------|-----------------|-----------------|
| C6   | 28(4)           | 30(3)           | 34(4)           | 0(3)            | 2(3)            | 4(3)            |
| C8   | 41(4)           | 32(4)           | 34(4)           | -6(3)           | 3(3)            | -3(3)           |
| C9   | 48(5)           | 40(4)           | 38(4)           | 9(3)            | 10(4)           | 7(4)            |
| C11  | 37(4)           | 32(4)           | 35(4)           | 1(3)            | 4(3)            | 6(3)            |
| N13  | 46(4)           | 33(3)           | 38(3)           | -7(3)           | 8(3)            | -1(3)           |
| F15  | 74(18)          | 100(30)         | 110(30)         | 49(17)          | -20(16)         | -42(17)         |
| C16  | 61(6)           | 29(4)           | 55(5)           | 7(4)            | 12(4)           | 12(4)           |
| C17  | 49(5)           | 28(3)           | 35(4)           | -1(3)           | 0(3)            | 1(3)            |
| C22  | 54(5)           | 39(4)           | 47(5)           | 18(4)           | 3(4)            | 8(4)            |
| C24  | 57(5)           | 34(4)           | 55(5)           | -4(4)           | -6(4)           | 17(4)           |
| F26  | 41(17)          | 150(30)         | 100(20)         | -4(18)          | -27(13)         | 10(16)          |
| C28  | 63(6)           | 30(4)           | 46(4)           | 3(3)            | 18(4)           | 6(4)            |
| C30  | 51(5)           | 47(5)           | 45(5)           | -6(4)           | 7(4)            | -15(4)          |
| C33  | 39(5)           | 44(4)           | 53(5)           | -9(4)           | 11(4)           | -7(4)           |
| C21  | 43(4)           | 33(4)           | 39(4)           | -1(3)           | 9(3)            | 3(3)            |
| C23  | 50(5)           | 46(4)           | 43(4)           | -8(4)           | 5(4)            | -8(4)           |
| C31  | 63(6)           | 71(6)           | 39(5)           | -18(4)          | 6(4)            | -11(5)          |
| C29  | 55(6)           | 64(6)           | 49(5)           | 0(4)            | 24(4)           | 0(5)            |
| C27  | 57(6)           | 46(5)           | 62(6)           | 0(4)            | 27(5)           | -4(4)           |
| F34  | 120(40)         | 70(20)          | 400(110)        | 60(40)          | -120(50)        | 20(20)          |
| C36  | 134(11)         | 52(6)           | 45(5)           | -13(4)          | 15(6)           | 0(7)            |
| C32  | 75(7)           | 51(5)           | 53(5)           | -14(4)          | -17(5)          | -3(5)           |
| C20  | 61(6)           | 40(4)           | 49(5)           | -5(4)           | -2(4)           | -3(4)           |
| C12  | 50(5)           | 28(3)           | 35(4)           | 1(3)            | 4(3)            | -1(3)           |
| C19  | 59(6)           | 52(5)           | 53(5)           | -13(4)          | 13(4)           | -2(4)           |
| C35  | 72(7)           | 65(6)           | 61(6)           | -19(5)          | 23(5)           | 7(5)            |
| B37  | 51(7)           | 57(7)           | 67(7)           | 14(6)           | 5(6)            | -10(6)          |
| F1   | 100(20)         | 150(30)         | 37(11)          | 15(14)          | 32(11)          | -4(19)          |
| F15A | 55(8)           | 74(13)          | 54(8)           | 7(9)            | 9(6)            | -24(9)          |
| F26A | 43(11)          | 51(9)           | 240(30)         | 29(12)          | -29(14)         | 4(7)            |
| F1A  | 130(20)         | 310(50)         | 91(13)          | 30(20)          | 55(13)          | -30(30)         |
| F34A | 102(12)         | 60(8)           | 105(12)         | 2(8)            | 44(11)          | 8(7)            |

| Atom | Atom | Length/ $\text{\AA}$ | Atom | Atom | Length/ $\text{\AA}$ |
|------|------|----------------------|------|------|----------------------|
| N1   | C2   | 1.387(9)             | C16  | C28  | 1.356(11)            |
| N1   | C6   | 1.342(9)             | C17  | C24  | 1.514(11)            |
| N1   | C17  | 1.520(9)             | C17  | C30  | 1.511(11)            |
| C2   | C4   | 1.491(7)             | F26  | B37  | 1.31(4)              |
| C2   | C5   | 1.367(9)             | C33  | C21  | 1.3900               |

| Atom | Atom | Length/Å  | Atom | Atom | Length/Å |
|------|------|-----------|------|------|----------|
| C3   | C6   | 1.408(9)  | C33  | C27  | 1.3900   |
| C3   | C9   | 1.418(10) | C21  | C23  | 1.3900   |
| C3   | C11  | 1.428(10) | C23  | C31  | 1.3900   |
| C4   | C7   | 1.3900    | C31  | C29  | 1.3900   |
| C4   | C10  | 1.3900    | C29  | C27  | 1.3900   |
| C7   | C14  | 1.3900    | F34  | B37  | 1.22(3)  |
| C14  | C25  | 1.3900    | F34  | F1   | 1.32(15) |
| C25  | C18  | 1.3900    | C36  | C32  | 1.3900   |
| C18  | C10  | 1.3900    | C36  | C35  | 1.3900   |
| C5   | C11  | 1.420(10) | C32  | C20  | 1.3900   |
| C5   | C12  | 1.493(8)  | C20  | C12  | 1.3900   |
| C6   | C8   | 1.501(9)  | C12  | C19  | 1.3900   |
| C8   | N13  | 1.278(9)  | C19  | C35  | 1.3900   |
| C8   | C21  | 1.479(8)  | B37  | F1   | 1.37(3)  |
| C9   | C22  | 1.359(11) | B37  | F15A | 1.44(3)  |
| C11  | C28  | 1.415(10) | B37  | F26A | 1.40(3)  |
| N13  | C17  | 1.446(9)  | B37  | F1A  | 1.36(4)  |
| F15  | B37  | 1.20(6)   | B37  | F34A | 1.41(2)  |
| C16  | C22  | 1.398(12) |      |      |          |

| Atom | Atom | Atom | Angle/°  | Atom | Atom | Atom | Angle/°  |
|------|------|------|----------|------|------|------|----------|
| C2   | N1   | C17  | 127.9(6) | C24  | C17  | N1   | 112.1(6) |
| C6   | N1   | C2   | 122.6(6) | C30  | C17  | N1   | 111.1(6) |
| C6   | N1   | C17  | 109.4(5) | C30  | C17  | C24  | 112.7(7) |
| N1   | C2   | C4   | 121.3(5) | C9   | C22  | C16  | 120.4(7) |
| C5   | C2   | N1   | 117.8(6) | C16  | C28  | C11  | 120.9(8) |
| C5   | C2   | C4   | 120.9(6) | C21  | C33  | C27  | 120.0    |
| C6   | C3   | C9   | 124.4(7) | C33  | C21  | C8   | 121.1(4) |
| C6   | C3   | C11  | 116.5(6) | C23  | C21  | C8   | 118.9(4) |
| C9   | C3   | C11  | 119.0(6) | C23  | C21  | C33  | 120.0    |
| C7   | C4   | C2   | 119.1(4) | C31  | C23  | C21  | 120.0    |
| C7   | C4   | C10  | 120.0    | C23  | C31  | C29  | 120.0    |
| C10  | C4   | C2   | 120.8(4) | C31  | C29  | C27  | 120.0    |
| C4   | C7   | C14  | 120.0    | C29  | C27  | C33  | 120.0    |
| C7   | C14  | C25  | 120.0    | B37  | F34  | F1   | 65(5)    |
| C14  | C25  | C18  | 120.0    | C32  | C36  | C35  | 120.0    |
| C10  | C18  | C25  | 120.0    | C20  | C32  | C36  | 120.0    |
| C18  | C10  | C4   | 120.0    | C12  | C20  | C32  | 120.0    |
| C2   | C5   | C11  | 121.6(7) | C20  | C12  | C5   | 119.0(5) |
| C2   | C5   | C12  | 120.7(6) | C20  | C12  | C19  | 120.0    |
| C11  | C5   | C12  | 117.7(6) | C19  | C12  | C5   | 120.8(5) |

| Atom | Atom | Atom | Angle/°  | Atom      | Atom | Atom | Angle/°   |     |           |
|------|------|------|----------|-----------|------|------|-----------|-----|-----------|
| N1   | C6   | C3   | 122.0(6) | C12       | C19  | C35  | 120.0     |     |           |
| N1   | C6   | C8   | 104.9(6) | C19       | C35  | C36  | 120.0     |     |           |
| C3   | C6   | C8   | 133.1(7) | F15       | B37  | F26  | 117(4)    |     |           |
| N13  | C8   | C6   | 111.7(6) | F15       | B37  | F34  | 111(4)    |     |           |
| N13  | C8   | C21  | 120.4(6) | F15       | B37  | F1   | 109(3)    |     |           |
| C21  | C8   | C6   | 127.9(6) | F26       | B37  | F1   | 129(3)    |     |           |
| C22  | C9   | C3   | 120.5(7) | F34       | B37  | F26  | 117(4)    |     |           |
| C5   | C11  | C3   | 119.2(6) | F34       | B37  | F1   | 61(8)     |     |           |
| C28  | C11  | C3   | 118.1(7) | F26A      | B37  | F15A | 108.7(19) |     |           |
| C28  | C11  | C5   | 122.7(7) | F26A      | B37  | F34A | 105.5(18) |     |           |
| C8   | N13  | C17  | 110.4(6) | F1A       | B37  | F15A | 102(2)    |     |           |
| C28  | C16  | C22  | 120.9(7) | F1A       | B37  | F26A | 93(3)     |     |           |
| N13  | C17  | N1   | 103.2(5) | F1A       | B37  | F34A | 138(3)    |     |           |
| N13  | C17  | C24  | 106.8(7) | F34A      | B37  | F15A | 106.7(15) |     |           |
| N13  | C17  | C30  | 110.4(6) | F34       | F1   | B37  | 54(3)     |     |           |
| A    | B    | C    | D        | Angle/°   | A    | B    | C         | D   | Angle/°   |
| N1   | C2   | C4   | C7       | -90.9(7)  | C6   | C8   | C21       | C23 | 138.1(7)  |
| N1   | C2   | C4   | C10      | 93.2(7)   | C8   | N13  | C17       | N1  | -0.3(9)   |
| N1   | C2   | C5   | C11      | -3.7(11)  | C8   | N13  | C17       | C24 | 118.0(7)  |
| N1   | C2   | C5   | C12      | 176.0(6)  | C8   | N13  | C17       | C30 | -119.1(7) |
| N1   | C6   | C8   | N13      | -6.2(9)   | C8   | C21  | C23       | C31 | 179.1(6)  |
| N1   | C6   | C8   | C21      | 171.8(7)  | C9   | C3   | C6        | N1  | 173.6(7)  |
| C2   | N1   | C6   | C3       | 4.9(11)   | C9   | C3   | C6        | C8  | -4.8(13)  |
| C2   | N1   | C6   | C8       | -176.3(6) | C9   | C3   | C11       | C5  | -178.7(7) |
| C2   | N1   | C17  | N13      | 178.4(7)  | C9   | C3   | C11       | C28 | 4.2(11)   |
| C2   | N1   | C17  | C24      | 63.9(10)  | C11  | C3   | C6        | N1  | -3.2(11)  |
| C2   | N1   | C17  | C30      | -63.3(9)  | C11  | C3   | C6        | C8  | 178.3(8)  |
| C2   | C4   | C7   | C14      | -175.9(5) | C11  | C3   | C9        | C22 | -3.4(12)  |
| C2   | C4   | C10  | C18      | 175.8(5)  | C11  | C5   | C12       | C20 | 96.9(7)   |
| C2   | C5   | C11  | C3       | 5.2(12)   | C11  | C5   | C12       | C19 | -79.1(7)  |
| C2   | C5   | C11  | C28      | -177.8(8) | N13  | C8   | C21       | C33 | 135.1(6)  |
| C2   | C5   | C12  | C20      | -82.8(8)  | N13  | C8   | C21       | C23 | -44.0(9)  |
| C2   | C5   | C12  | C19      | 101.2(7)  | F15  | B37  | F1        | F34 | 104(4)    |
| C3   | C6   | C8   | N13      | 172.4(8)  | C17  | N1   | C2        | C4  | -4.0(11)  |
| C3   | C6   | C8   | C21      | -9.5(14)  | C17  | N1   | C2        | C5  | 176.4(7)  |
| C3   | C9   | C22  | C16      | 1.5(14)   | C17  | N1   | C6        | C3  | -173.1(7) |
| C3   | C11  | C28  | C16      | -3.3(13)  | C17  | N1   | C6        | C8  | 5.7(8)    |
| C4   | C2   | C5   | C11      | 176.7(6)  | C22  | C16  | C28       | C11 | 1.5(14)   |
| C4   | C2   | C5   | C12      | -3.6(11)  | F26  | B37  | F1        | F34 | -102(5)   |
| C4   | C7   | C14  | C25      | 0.0       | C28  | C16  | C22       | C9  | -0.5(15)  |

| A   | B   | C   | D   | Angle/°   | A   | B   | C   | D   | Angle/°   |
|-----|-----|-----|-----|-----------|-----|-----|-----|-----|-----------|
| C7  | C4  | C10 | C18 | 0.0       | C33 | C21 | C23 | C31 | 0.0       |
| C7  | C14 | C25 | C18 | 0.0       | C21 | C8  | N13 | C17 | -174.3(7) |
| C14 | C25 | C18 | C10 | 0.0       | C21 | C33 | C27 | C29 | 0.0       |
| C25 | C18 | C10 | C4  | 0.0       | C21 | C23 | C31 | C29 | 0.0       |
| C10 | C4  | C7  | C14 | 0.0       | C23 | C31 | C29 | C27 | 0.0       |
| C5  | C2  | C4  | C7  | 88.6(7)   | C31 | C29 | C27 | C33 | 0.0       |
| C5  | C2  | C4  | C10 | -87.2(8)  | C27 | C33 | C21 | C8  | -179.1(6) |
| C5  | C11 | C28 | C16 | 179.7(8)  | C27 | C33 | C21 | C23 | 0.0       |
| C5  | C12 | C19 | C35 | 176.0(5)  | C36 | C32 | C20 | C12 | 0.0       |
| C6  | N1  | C2  | C4  | 178.3(6)  | C32 | C36 | C35 | C19 | 0.0       |
| C6  | N1  | C2  | C5  | -1.3(11)  | C32 | C20 | C12 | C5  | -176.0(5) |
| C6  | N1  | C17 | N13 | -3.7(8)   | C32 | C20 | C12 | C19 | 0.0       |
| C6  | N1  | C17 | C24 | -118.2(7) | C20 | C12 | C19 | C35 | 0.0       |
| C6  | N1  | C17 | C30 | 114.6(7)  | C12 | C5  | C11 | C3  | -174.6(6) |
| C6  | C3  | C9  | C22 | 179.8(8)  | C12 | C5  | C11 | C28 | 2.4(11)   |
| C6  | C3  | C11 | C5  | -1.6(11)  | C12 | C19 | C35 | C36 | 0.0       |
| C6  | C3  | C11 | C28 | -178.8(7) | C35 | C36 | C32 | C20 | 0.0       |
| C6  | C8  | N13 | C17 | 3.9(9)    | F1  | F34 | B37 | F15 | -101(5)   |
| C6  | C8  | C21 | C33 | -42.8(10) | F1  | F34 | B37 | F26 | 122(4)    |

**Table S13 Hydrogen Atom Coordinates ( $\text{\AA}\times 10^4$ ) and Isotropic Displacement Parameters ( $\text{\AA}^2\times 10^3$ ) for *1\_tw*.**

| Atom | x       | y        | z        | U(eq) |
|------|---------|----------|----------|-------|
| H7   | 498.22  | 1452.11  | 6453.51  | 46    |
| H14  | 435.25  | 2032.79  | 5127.17  | 56    |
| H25  | 2744.04 | 2415.43  | 4603.82  | 61    |
| H18  | 5115.81 | 2217.39  | 5406.79  | 59    |
| H10  | 5178.82 | 1636.71  | 6733.14  | 47    |
| H9   | 3032.65 | 117.42   | 10437.7  | 50    |
| H16  | 3595.69 | -1608.38 | 9055.5   | 58    |
| H22  | 3376.93 | -1056.89 | 10381.41 | 56    |
| H24A | 1285.27 | 2510.91  | 7479.9   | 74    |
| H24B | 1084.81 | 2953.04  | 8320.42  | 74    |
| H24C | 292.82  | 2220.82  | 8210.52  | 74    |
| H28  | 3394.4  | -999.1   | 7782.74  | 55    |
| H30A | 5020.42 | 2252.53  | 8565.38  | 71    |
| H30B | 4178.44 | 2971.57  | 8625.46  | 71    |
| H30C | 4144.7  | 2581.85  | 7727.7   | 71    |
| H33  | 607.07  | 638.1    | 10485.4  | 54    |
| H23  | 3554.32 | 2198.48  | 11198.36 | 55    |
| H31  | 3063.5  | 2037.02  | 12647.12 | 69    |

**Table S13 Hydrogen Atom Coordinates ( $\text{\AA} \times 10^4$ ) and Isotropic Displacement Parameters ( $\text{\AA}^2 \times 10^3$ ) for *1\_tw*.**

| <b>Atom</b> | <b>x</b> | <b>y</b> | <b>z</b> | <b>U(eq)</b> |
|-------------|----------|----------|----------|--------------|
| H29         | 1344.46  | 1176.1   | 13015.03 | 66           |
| H27         | 116.23   | 476.63   | 11934.18 | 65           |
| H36         | 3097.03  | -1051.12 | 4646.46  | 92           |
| H32         | 742.49   | -670.65  | 5115.29  | 73           |
| H20         | 722.35   | -22.17   | 6387.7   | 61           |
| H19         | 5411.29  | -134.62  | 6722.47  | 65           |
| H35         | 5431.46  | -783.1   | 5450.06  | 78           |

| <b>Atom</b> | <b>Occupancy</b> | <b>Atom</b> | <b>Occupancy</b> | <b>Atom</b> | <b>Occupancy</b> |
|-------------|------------------|-------------|------------------|-------------|------------------|
| F15         | 0.39(6)          | F26         | 0.39(6)          | F34         | 0.39(6)          |
| F1          | 0.39(6)          | F15A        | 0.61(6)          | F26A        | 0.61(6)          |
| F1A         | 0.61(6)          | F34A        | 0.61(6)          |             |                  |
